# Supplementary material
Source: publisher site journal article supplement (https://www.dovepress.com/get_supplementary_file.php?f=413897.docx)
Supplement: Supplementary file 1 [file get_supplementary_file.php]

**Supplementary materials**

**
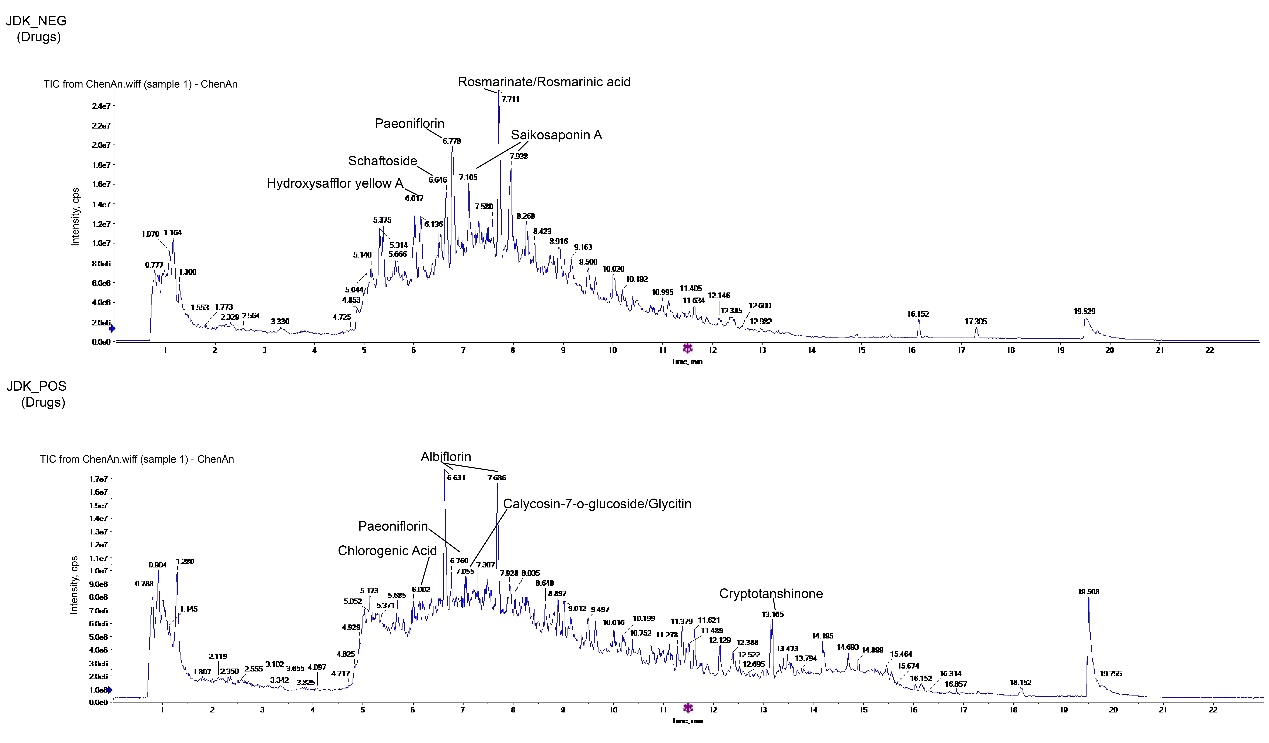
**

**Supplementary Figure 1. UPLC and MS was used to identify drug components in JDK.**

**Supplementary Table 1. Table of active ingredients in JDK for network pharmacological analysis (Positive).**

| **Sample Name** | **Area** | **Height** | **Retention Time** | **Adduct / Charge** | **Formula** | **Found At Mass** | **Library Hit** |
| --- | --- | --- | --- | --- | --- | --- | --- |
| ChenAn | 14440000.00 | 3847000.00 | 6.64 | [M+H]+ | C23H28O11 | 481.17 | Albiflorin |
| ChenAn | 10520000.00 | 2803000.00 | 7.69 | [M+H]+ | C23H28O11 | 481.17 | Albiflorin |
| ChenAn | 5748000.00 | 1534000.00 | 13.17 | [M+H]+ | C19H20O3 | 297.15 | Cryptotanshinone |
| ChenAn | 3618000.00 | 1055000.00 | 7.05 | [M+H]+ | C22H22O10 | 447.13 | Calycosin-7-o-glucoside |
| ChenAn | 3618000.00 | 1055000.00 | 7.05 | [M+H]+ | C22H22O10 | 447.13 | Glycitin |
| ChenAn | 2932000.00 | 664600.00 | 6.13 | [M+H]+ | C16H18O9 | 355.10 | Chlorogenic Acid |
| ChenAn | 2932000.00 | 664600.00 | 6.13 | [M+H]+ | C16H18O9 | 355.10 | Chlorogenic Acid |
| ChenAn | 2717000.00 | 614100.00 | 6.13 | [M+H]+ | C16H18O9 | 355.10 | Chlorogenic acid |
| ChenAn | 2567000.00 | 496600.00 | 6.78 | [M+H]+ | C23H28O11.NH3 | 498.20 | Paeoniflorin +NH3 |
| ChenAn | 2478000.00 | 702900.00 | 14.20 | [M+H]+ | C19H18O3 | 295.13 | Tanshinone IIA |
| ChenAn | 2328000.00 | 403300.00 | 5.16 | [M+H]+ | C9H11NO2 | 166.09 | L-Phenylalanine |
| ChenAn | 2328000.00 | 403300.00 | 5.16 | [M+H]+ | C9H11NO2 | 166.09 | PHENYLALANINE |
| ChenAn | 2285000.00 | 396100.00 | 5.16 | [M+H]+ | C9H11NO2 | 166.09 | Phenprobamate |
| ChenAn | 2285000.00 | 396100.00 | 5.16 | [M+H]+ | C9H11NO2 | 166.09 | Phenylalanine |
| ChenAn | 2137000.00 | 642100.00 | 8.66 | [M+H]+ | C16H12O5 | 285.08 | Macrosporin |
| ChenAn | 2137000.00 | 642100.00 | 8.66 | [M+H]+ | C16H12O5 | 285.08 | Calycosin |
| ChenAn | 2007000.00 | 582200.00 | 1.08 | [M+H]+ | C5H9NO2 | 116.07 | L-Proline |
| ChenAn | 1995000.00 | 579900.00 | 1.08 | [M+H]+ | C5H9NO2 | 116.07 | Proline |
| ChenAn | 1974000.00 | 185400.00 | 2.33 | [M+H]+ | C5H7NO3 | 130.05 | OXOPROLINE |
| ChenAn | 1974000.00 | 185400.00 | 2.33 | [M+H]+ | C5H7NO3 | 130.05 | PYROGLUTAMATE |
| ChenAn | 1974000.00 | 185400.00 | 2.33 | [M+H]+ | C5H7NO3 | 130.05 | Pyroglutamic acid |
| ChenAn | 1974000.00 | 185400.00 | 2.33 | [M+H]+ | C5H7NO3 | 130.05 | Pyrrolidonecarboxylic acid |
| ChenAn | 1935000.00 | 592000.00 | 8.04 | [M+H]+ | C22H22O9 | 431.13 | Ononin |
| ChenAn | 1781000.00 | 677900.00 | 0.91 | [M+H]+ | C6H14N4O2 | 175.12 | ARGININE |
| ChenAn | 1781000.00 | 677900.00 | 0.91 | [M+H]+ | C6H14N4O2 | 175.12 | L-Arginine |
| ChenAn | 1773000.00 | 491900.00 | 11.38 | [M+H]+ | C24H40O4 | 393.29 | DEOXYCHOLATE |
| ChenAn | 1773000.00 | 491900.00 | 11.38 | [M+H]+ | C24H40O4 | 393.29 | Hyodeoxycholic Acid |
| ChenAn | 1773000.00 | 491900.00 | 11.38 | [M+H]+ | C24H40O4 | 393.29 | Hyodeoxycholic Acid |
| ChenAn | 1773000.00 | 491900.00 | 11.38 | [M+H]+ | C24H40O4 | 393.29 | URSODEOXYCHOLATE |
| ChenAn | 1770000.00 | 666600.00 | 0.91 | [M+H]+ | C6H14N4O2 | 175.12 | L(+)-Arginine |
| ChenAn | 1675000.00 | 418800.00 | 5.69 | [M+H]+ | C11H12N2O2 | 205.10 | L-Tryptophan |
| ChenAn | 1568000.00 | 415200.00 | 5.69 | [M+H]+ | C11H9NO2 | 188.07 | Indoleacrylic acid |
| ChenAn | 1525000.00 | 429300.00 | 12.14 | [M+H]+ | C18H14O3 | 279.10 | Dihydrotanshinone I |
| ChenAn | 1517000.00 | 436900.00 | 8.90 | [M+H]+ | C30H32O12.NH3 | 602.22 | Benzoylpaeoniflorin +NH3 |
| ChenAn | 1445000.00 | 420100.00 | 4.93 | [M+H]+ | C10H13N5O4 | 268.10 | ADENOSINE |
| ChenAn | 1444000.00 | 92380.00 | 1.95 | [M+H]+ | C6H13NO2 | 132.10 | Alloisoleucine |
| ChenAn | 1444000.00 | 92380.00 | 1.95 | [M+H]+ | C6H13NO2 | 132.10 | Alloisoleucine |
| ChenAn | 1444000.00 | 92380.00 | 1.95 | [M+H]+ | C6H13NO2 | 132.10 | ISOLEUCINE |
| ChenAn | 1444000.00 | 92380.00 | 1.95 | [M+H]+ | C6H13NO2 | 132.10 | ISOLEUCINE |
| ChenAn | 1444000.00 | 92380.00 | 1.95 | [M+H]+ | C6H13NO2 | 132.10 | L-Alloisoleucine |
| ChenAn | 1444000.00 | 92380.00 | 1.95 | [M+H]+ | C6H13NO2 | 132.10 | L-Alloisoleucine |
| ChenAn | 1444000.00 | 92380.00 | 1.95 | [M+H]+ | C6H13NO2 | 132.10 | LEUCINE |
| ChenAn | 1444000.00 | 92380.00 | 1.95 | [M+H]+ | C6H13NO2 | 132.10 | LEUCINE |
| ChenAn | 1444000.00 | 92380.00 | 1.95 | [M+H]+ | C6H13NO2 | 132.10 | L-Isoleucine |
| ChenAn | 1444000.00 | 92380.00 | 1.95 | [M+H]+ | C6H13NO2 | 132.10 | L-Isoleucine |
| ChenAn | 1444000.00 | 92380.00 | 1.95 | [M+H]+ | C6H13NO2 | 132.10 | L-Leucine |
| ChenAn | 1444000.00 | 92380.00 | 1.95 | [M+H]+ | C6H13NO2 | 132.10 | L-Leucine |
| ChenAn | 1444000.00 | 92380.00 | 1.95 | [M+H]+ | C6H13NO2 | 132.10 | L-Norleucine |
| ChenAn | 1444000.00 | 92380.00 | 1.95 | [M+H]+ | C6H13NO2 | 132.10 | L-Norleucine |
| ChenAn | 1444000.00 | 92380.00 | 1.95 | [M+H]+ | C6H13NO2 | 132.10 | NORLEUCINE |
| ChenAn | 1444000.00 | 92380.00 | 1.95 | [M+H]+ | C6H13NO2 | 132.10 | NORLEUCINE |
| ChenAn | 1432000.00 | 91640.00 | 1.95 | [M+H]+ | C6H13NO2 | 132.10 | Leucine |
| ChenAn | 1432000.00 | 91640.00 | 1.95 | [M+H]+ | C6H13NO2 | 132.10 | Leucine |
| ChenAn | 1432000.00 | 91640.00 | 1.95 | [M+H]+ | C6H13NO2 | 132.10 | Isoleucine |
| ChenAn | 1432000.00 | 91640.00 | 1.95 | [M+H]+ | C6H13NO2 | 132.10 | Isoleucine |
| ChenAn | 1424000.00 | 446300.00 | 11.63 | [M+H]+ | C19H20O3 | 297.15 | Cryptotanshinone |
| ChenAn | 1397000.00 | 406600.00 | 4.93 | [M+H]+ | C10H13N5O4 | 268.10 | Adenosine |
| ChenAn | 1348000.00 | 389500.00 | 8.24 | [M+H]+ | C28H32O14 | 593.19 | Linarin |
| ChenAn | 1345000.00 | 248300.00 | 6.56 | [M+H]+ | C27H30O16 | 611.16 | Rutin |
| ChenAn | 1215000.00 | 91690.00 | 1.54 | [M+H]+ | C6H13NO2 | 132.10 | Alloisoleucine |
| ChenAn | 1215000.00 | 91690.00 | 1.54 | [M+H]+ | C6H13NO2 | 132.10 | ISOLEUCINE |
| ChenAn | 1215000.00 | 91690.00 | 1.54 | [M+H]+ | C6H13NO2 | 132.10 | L-Alloisoleucine |
| ChenAn | 1215000.00 | 91690.00 | 1.54 | [M+H]+ | C6H13NO2 | 132.10 | LEUCINE |
| ChenAn | 1215000.00 | 91690.00 | 1.54 | [M+H]+ | C6H13NO2 | 132.10 | L-Isoleucine |
| ChenAn | 1215000.00 | 91690.00 | 1.54 | [M+H]+ | C6H13NO2 | 132.10 | L-Leucine |
| ChenAn | 1215000.00 | 91690.00 | 1.54 | [M+H]+ | C6H13NO2 | 132.10 | L-Norleucine |
| ChenAn | 1215000.00 | 91690.00 | 1.54 | [M+H]+ | C6H13NO2 | 132.10 | NORLEUCINE |
| ChenAn | 1207000.00 | 91080.00 | 1.54 | [M+H]+ | C6H13NO2 | 132.10 | Leucine |
| ChenAn | 1207000.00 | 91080.00 | 1.54 | [M+H]+ | C6H13NO2 | 132.10 | Isoleucine |
| ChenAn | 1207000.00 | 91080.00 | 1.54 | [M+H]+ | C6H13NO2 | 132.10 | Isoleucine |
| ChenAn | 1135000.00 | 311400.00 | 1.31 | [M+H]+ | C5H7NO3 | 130.05 | OXOPROLINE |
| ChenAn | 1135000.00 | 311400.00 | 1.31 | [M+H]+ | C5H7NO3 | 130.05 | PYROGLUTAMATE |
| ChenAn | 1135000.00 | 311400.00 | 1.31 | [M+H]+ | C5H7NO3 | 130.05 | Pyroglutamic acid |
| ChenAn | 1135000.00 | 311400.00 | 1.31 | [M+H]+ | C5H7NO3 | 130.05 | Pyrrolidonecarboxylic acid |
| ChenAn | 1119000.00 | 236300.00 | 5.64 | [M+H]+ | C16H18O9 | 355.10 | Chlorogenic Acid |
| ChenAn | 1119000.00 | 236300.00 | 5.64 | [M+H]+ | C16H18O9 | 355.10 | Chlorogenic Acid |
| ChenAn | 1111000.00 | 345900.00 | 9.96 | [M+H]+ | C16H12O4 | 269.08 | Formononetin |
| ChenAn | 1100000.00 | 233000.00 | 7.14 | [M+H]+ | C21H20O12 | 465.10 | Isoquercitrin |
| ChenAn | 1100000.00 | 233000.00 | 7.14 | [M+H]+ | C21H20O12 | 465.10 | Hyperin |
| ChenAn | 1096000.00 | 306500.00 | 6.96 | [M+H]+ | C27H30O16 | 611.16 | Rutin |
| ChenAn | 1062000.00 | 196400.00 | 6.56 | [M+H]+ | C27H30O16 | 611.16 | Rutin |
| ChenAn | 1035000.00 | 267100.00 | 7.57 | [M+H]+ | C25H24O12 | 517.13 | 1,4-Dicaffeoylquinic Acid (Cynarin) |
| ChenAn | 1035000.00 | 267100.00 | 7.57 | [M+H]+ | C25H24O12 | 517.13 | 1,5-DCQA 1,5-Dicaffeoylquinic acid |
| ChenAn | 1035000.00 | 267100.00 | 7.57 | [M+H]+ | C25H24O12 | 517.13 | 3,4-DCQA Isochlorogenic acid B |
| ChenAn | 1035000.00 | 267100.00 | 7.57 | [M+H]+ | C25H24O12 | 517.13 | 3,5-Dicaffeoyl quinic acid |
| ChenAn | 1035000.00 | 267100.00 | 7.57 | [M+H]+ | C25H24O12 | 517.13 | 3,5-DCQA Isochlorogenic acid A |
| ChenAn | 1035000.00 | 267100.00 | 7.57 | [M+H]+ | C25H24O12 | 517.13 | 4,5-DCQA Isochlorogenic acid C |
| ChenAn | 1035000.00 | 267100.00 | 7.57 | [M+H]+ | C25H24O12 | 517.13 | Isochlorogenic acid A |
| ChenAn | 1035000.00 | 217700.00 | 5.64 | [M+H]+ | C16H18O9 | 355.10 | Chlorogenic acid |
| ChenAn | 993200.00 | 249400.00 | 7.69 | [M+H]+ | C23H28O11.NH3 | 498.20 | Paeoniflorin +NH3 |
| ChenAn | 962800.00 | 165100.00 | 13.80 | [M+H]+ | C6H4[CO2(CH2)3CH3]2 | 279.16 | Dibutyl phthalate |
| ChenAn | 950400.00 | 264900.00 | 7.69 | [M+H]+ | C10H12O4 | 197.08 | Cantharidin |
| ChenAn | 934100.00 | 235400.00 | 12.98 | [M+H]+ | C18H30O2 | 279.23 | Alpha-Linolenic acid |
| ChenAn | 929600.00 | 92650.00 | 1.43 | [M+H]+ | C9H11NO3 | 182.08 | L-Tyrosine |
| ChenAn | 929600.00 | 92650.00 | 1.43 | [M+H]+ | C9H11NO3 | 182.08 | L-Tyrosine |
| ChenAn | 929600.00 | 92650.00 | 1.43 | [M+H]+ | C9H11NO3 | 182.08 | o-Tyrosine |
| ChenAn | 929600.00 | 92650.00 | 1.43 | [M+H]+ | C9H11NO3 | 182.08 | o-Tyrosine |
| ChenAn | 929600.00 | 92650.00 | 1.43 | [M+H]+ | C9H11NO3 | 182.08 | TYROSINE |
| ChenAn | 929600.00 | 92650.00 | 1.43 | [M+H]+ | C9H11NO3 | 182.08 | TYROSINE |
| ChenAn | 897400.00 | 174100.00 | 13.80 | [M+H]+ | C6H4[CO2CH2CH(CH3)2]2 | 279.16 | DIISOBUTYL PHTHALATE |
| ChenAn | 821100.00 | 239000.00 | 7.49 | [M+H]+ | C28H34O15 | 611.20 | Hesperidin |
| ChenAn | 809500.00 | 187600.00 | 6.77 | [M+H]+ | C9H10O2 | 151.08 | 4-Ethylbenzoic Acid |
| ChenAn | 809500.00 | 187600.00 | 6.77 | [M+H]+ | C9H10O2 | 151.08 | Hydrocinnamic acid |
| ChenAn | 809500.00 | 187600.00 | 6.77 | [M+H]+ | C9H10O2 | 151.08 | Hydrocinnamic acid |
| ChenAn | 794200.00 | 184400.00 | 6.77 | [M+H]+ | C9H10O2 | 151.08 | Hydrocinnamic acid |
| ChenAn | 773700.00 | 231500.00 | 4.99 | [M+H]+ | C10H13N5O5 | 284.10 | Guanosine |
| ChenAn | 705000.00 | 137300.00 | 9.15 | [M+H]+ | C18H26O2 | 275.20 | a-Nortestosteron |
| ChenAn | 705000.00 | 137300.00 | 9.15 | [M+H]+ | C18H26O2 | 275.20 | Nandrolon |
| ChenAn | 705000.00 | 137300.00 | 9.15 | [M+H]+ | C18H26O2 | 275.20 | Nandrolone |
| ChenAn | 698300.00 | 203700.00 | 9.66 | [M+H]+ | C30H32O12.NH3 | 602.22 | Benzoylpaeoniflorin +NH3 |
| ChenAn | 696900.00 | 216400.00 | 10.13 | [M+H]+ | C17H16O5 | 301.11 | 3-Hydroxy-9,10-Dimethoxypterocarpan |
| ChenAn | 671000.00 | 65430.00 | 2.79 | [M+H]+ | C6H13NO2 | 132.10 | Alloisoleucine |
| ChenAn | 671000.00 | 65430.00 | 2.79 | [M+H]+ | C6H13NO2 | 132.10 | ISOLEUCINE |
| ChenAn | 671000.00 | 65430.00 | 2.79 | [M+H]+ | C6H13NO2 | 132.10 | L-Alloisoleucine |
| ChenAn | 671000.00 | 65430.00 | 2.79 | [M+H]+ | C6H13NO2 | 132.10 | LEUCINE |
| ChenAn | 671000.00 | 65430.00 | 2.79 | [M+H]+ | C6H13NO2 | 132.10 | L-Isoleucine |
| ChenAn | 671000.00 | 65430.00 | 2.79 | [M+H]+ | C6H13NO2 | 132.10 | L-Leucine |
| ChenAn | 671000.00 | 65430.00 | 2.79 | [M+H]+ | C6H13NO2 | 132.10 | L-Norleucine |
| ChenAn | 671000.00 | 65430.00 | 2.79 | [M+H]+ | C6H13NO2 | 132.10 | NORLEUCINE |
| ChenAn | 670200.00 | 58350.00 | 2.46 | [M+H]+ | C10H13N5O4 | 268.10 | ADENOSINE |
| ChenAn | 664100.00 | 64850.00 | 2.79 | [M+H]+ | C6H13NO2 | 132.10 | Leucine |
| ChenAn | 664100.00 | 64850.00 | 2.79 | [M+H]+ | C6H13NO2 | 132.10 | Isoleucine |
| ChenAn | 664100.00 | 64850.00 | 2.79 | [M+H]+ | C6H13NO2 | 132.10 | Isoleucine |
| ChenAn | 650800.00 | 196300.00 | 1.02 | [M+H]+ | C5H11NO2 | 118.09 | 5-AMINOPENTANOATE |
| ChenAn | 650800.00 | 196300.00 | 1.02 | [M+H]+ | C5H11NO2 | 118.09 | BETAINE |
| ChenAn | 650800.00 | 196300.00 | 1.02 | [M+H]+ | C5H11NO2 | 118.09 | N-Methyl-a-aminoisobutyric acid |
| ChenAn | 637800.00 | 150300.00 | 13.57 | [M+H]+ | C18H14O3 | 279.10 | Dihydrotanshinone I |
| ChenAn | 636500.00 | 194800.00 | 1.02 | [M+H]+ | C5H11NO2 | 118.09 | Betaine |
| ChenAn | 636200.00 | 194600.00 | 8.30 | [M+H]+ | C17H16O5 | 301.11 | 3-Hydroxy-9,10-Dimethoxypterocarpan |
| ChenAn | 634600.00 | 55480.00 | 2.46 | [M+H]+ | C10H13N5O4 | 268.10 | Adenosine |
| ChenAn | 630500.00 | 186000.00 | 7.49 | [M+H]+ | C28H34O15 | 611.20 | Neohesperidin |
| ChenAn | 630500.00 | 186000.00 | 7.49 | [M+H]+ | C28H34O15 | 611.20 | Hesperidin |
| ChenAn | 603600.00 | 143000.00 | 1.24 | [M+H]+ | C18H32O16 | 505.18 | Maltotriose |
| ChenAn | 603600.00 | 143000.00 | 1.24 | [M+H]+ | C18H32O16 | 505.18 | Raffinose |
| ChenAn | 590800.00 | 167700.00 | 11.39 | [M+H]+ | C24H40O4 | 393.29 | Hyodeoxycholic Acid |
| ChenAn | 589900.00 | 175900.00 | 10.07 | [M+H]+ | C12H14O2 | 191.11 | Ligustilide |
| ChenAn | 587800.00 | 201300.00 | 4.98 | [M+H]+ | C10H13N5O5 | 284.10 | Guanosine |
| ChenAn | 583000.00 | 66580.00 | 7.50 | [M+H]+ | C23H28O11 | 481.17 | Albiflorin |
| ChenAn | 581300.00 | 164200.00 | 13.15 | [M+H]+ | C18H12O3 | 277.09 | Tanshinone I |
| ChenAn | 569700.00 | 211700.00 | 1.13 | [M+H]+ | C7H7NO2 | 138.05 | 3-Pyridylacetic acid |
| ChenAn | 569700.00 | 211700.00 | 1.13 | [M+H]+ | C7H7NO2 | 138.05 | 4-AMINOBENZOATE |
| ChenAn | 569700.00 | 211700.00 | 1.13 | [M+H]+ | C7H7NO2 | 138.05 | ANTHRANILATE |
| ChenAn | 569700.00 | 211700.00 | 1.13 | [M+H]+ | C7H7NO2 | 138.05 | p-Aminobenzoic acid |
| ChenAn | 569700.00 | 211700.00 | 1.13 | [M+H]+ | C7H7NO2 | 138.05 | TRIGONELLINE |
| ChenAn | 562700.00 | 209200.00 | 1.13 | [M+H]+ | H2NC6H4CO2H | 138.05 | 4-Aminobenzoic acid |
| ChenAn | 562700.00 | 209200.00 | 1.13 | [M+H]+ | C7H7NO2 | 138.05 | Trigonelline |
| ChenAn | 561200.00 | 147700.00 | 6.64 | [M+H]+ | C10H12O4 | 197.08 | Cantharidin |
| ChenAn | 545000.00 | 162700.00 | 0.99 | [M+H]+ | C8H20NO6P | 258.11 | Glycerophosphocholine |
| ChenAn | 543200.00 | 113000.00 | 6.52 | [M+H]+ | C27H30O15 | 595.17 | Glucosylvitexin |
| ChenAn | 542600.00 | 149600.00 | 12.14 | [M+H]+ | C12H14O2 | 191.11 | Ligustilide |
| ChenAn | 499100.00 | 79710.00 | 6.90 | [M+H]+ | C21H20O12 | 465.10 | Isoquercitrin |
| ChenAn | 499100.00 | 79710.00 | 6.90 | [M+H]+ | C21H20O12 | 465.10 | Hyperin |
| ChenAn | 484000.00 | 141300.00 | 1.28 | [M+H]+ | C6H11NO2 | 130.09 | PIPECOLATE |
| ChenAn | 484000.00 | 141300.00 | 1.28 | [M+H]+ | C6H11NO2 | 130.09 | Pipecolic acid |
| ChenAn | 481700.00 | 84550.00 | 5.29 | [M+H]+ | C15H24O10.NH3 | 382.17 | Harpagide +NH3 |
| ChenAn | 464500.00 | 80380.00 | 10.48 | [M+H]+ | C30H46O3 | 455.35 | Betulonicacid |
| ChenAn | 458200.00 | 47990.00 | 3.10 | [M+H]+ | C9H11NO3 | 182.08 | L-Tyrosine |
| ChenAn | 458200.00 | 47990.00 | 3.10 | [M+H]+ | C9H11NO3 | 182.08 | o-Tyrosine |
| ChenAn | 458200.00 | 47990.00 | 3.10 | [M+H]+ | C9H11NO3 | 182.08 | TYROSINE |
| ChenAn | 457400.00 | 137600.00 | 7.26 | [M+H]+ | C27H30O15 | 595.17 | Aempferol-3-O-rutinoside |
| ChenAn | 455100.00 | 137600.00 | 14.90 | [M+H]+ | C18H30O2 | 279.23 | Alpha-Linolenic acid |
| ChenAn | 455100.00 | 137600.00 | 14.90 | [M+H]+ | C18H30O2 | 279.23 | GAMMA-LINOLENATE |
| ChenAn | 446400.00 | 115300.00 | 7.30 | [M+H]+ | C28H32O16 | 625.18 | Isorhamnetin-3-O-neohespeidoside |
| ChenAn | 446400.00 | 115300.00 | 7.30 | [M+H]+ | C28H32O16 | 625.18 | Narcissoside |
| ChenAn | 424200.00 | 92300.00 | 7.71 | [M+H]+ | C18H16O8 | 361.09 | ROSMARINATE |
| ChenAn | 408600.00 | 149000.00 | 1.24 | [M+H]+ | C7H13NO2 | 144.10 | Stachydrine hydrochloride |
| ChenAn | 405600.00 | 21110.00 | 1.81 | [M+H]+ | C10H12N5O7P | 346.06 | CYCLIC GMP |
| ChenAn | 405600.00 | 21110.00 | 1.81 | [M+H]+ | C10H12N5O7P | 346.06 | CYCLIC GMP |
| ChenAn | 404600.00 | 98310.00 | 7.18 | [M+H]+ | C21H18O12 | 463.09 | Luteolin-7-O-β-D-glucuronide |
| ChenAn | 404600.00 | 98310.00 | 7.18 | [M+H]+ | C21H18O12 | 463.09 | Scutellarin |
| ChenAn | 394000.00 | 113400.00 | 16.86 | [M+H]+ | CH3(CH2)16CONH2 | 284.29 | Octadecanamide |
| ChenAn | 392900.00 | 66010.00 | 6.92 | [M+H]+ | C15H10O7 | 303.05 | Quercetin |
| ChenAn | 388500.00 | 129000.00 | 1.28 | [M+H]+ | C5H5N5 | 136.06 | ADENINE |
| ChenAn | 388500.00 | 106400.00 | 0.95 | [M+H]+ | C5H9NO4 | 148.06 | GLUTAMATE |
| ChenAn | 388500.00 | 106400.00 | 0.95 | [M+H]+ | C5H9NO4 | 148.06 | L-Glutamic acid |
| ChenAn | 385900.00 | 28350.00 | 1.44 | [M+H]+ | C9H8O3 | 165.05 | 4-COUMARATE |
| ChenAn | 385900.00 | 28350.00 | 1.44 | [M+H]+ | C9H8O3 | 165.05 | 4-COUMARATE |
| ChenAn | 383200.00 | 101600.00 | 6.53 | [M+H]+ | C25H24O12 | 517.13 | 1,4-Dicaffeoylquinic Acid (Cynarin) |
| ChenAn | 383200.00 | 101600.00 | 6.53 | [M+H]+ | C25H24O12 | 517.13 | 1,5-DCQA 1,5-Dicaffeoylquinic acid |
| ChenAn | 383200.00 | 101600.00 | 6.53 | [M+H]+ | C25H24O12 | 517.13 | 3,4-DCQA Isochlorogenic acid B |
| ChenAn | 383200.00 | 101600.00 | 6.53 | [M+H]+ | C25H24O12 | 517.13 | 3,5-Dicaffeoyl quinic acid |
| ChenAn | 383200.00 | 101600.00 | 6.53 | [M+H]+ | C25H24O12 | 517.13 | 3,5-DCQA Isochlorogenic acid A |
| ChenAn | 383200.00 | 101600.00 | 6.53 | [M+H]+ | C25H24O12 | 517.13 | 4,5-DCQA Isochlorogenic acid C |
| ChenAn | 383200.00 | 101600.00 | 6.53 | [M+H]+ | C25H24O12 | 517.13 | Isochlorogenic acid A |
| ChenAn | 383100.00 | 127200.00 | 1.28 | [M+H]+ | C5H5N5 | 136.06 | ADENINE |
| ChenAn | 383100.00 | 127200.00 | 1.28 | [M+H]+ | C5H5N5 | 136.06 | Adenine |
| ChenAn | 377300.00 | 104400.00 | 0.95 | [M+H]+ | C5H9NO4 | 148.06 | Glutamic acid |
| ChenAn | 372400.00 | 101800.00 | 13.32 | [M+H]+ | C30H46O4 | 471.35 | Glycyrrhetinic acid |
| ChenAn | 372400.00 | 101800.00 | 13.32 | [M+H]+ | C30H46O4 | 471.35 | Glycyrrhetinic acid |
| ChenAn | 364600.00 | 62040.00 | 6.92 | [M+H]+ | C15H10O7 | 303.05 | Morin hydrate |
| ChenAn | 364600.00 | 62040.00 | 6.92 | [M+H]+ | C15H10O7 | 303.05 | Quercetin |
| ChenAn | 346300.00 | 113800.00 | 4.98 | [M+H]+ | C5H5N5O | 152.06 | GUANINE |
| ChenAn | 345900.00 | 101200.00 | 11.09 | [M+H]+ | C16H12O4 | 269.08 | Formononetin |
| ChenAn | 338300.00 | 87890.00 | 13.32 | [M+H]+ | C30H46O4 | 471.35 | Glycyrrhetinic acid |
| ChenAn | 298600.00 | 75120.00 | 10.77 | [M+H]+ | C18H39NO2 | 302.31 | SPHINGANINE |
| ChenAn | 294100.00 | 84060.00 | 8.42 | [M+H]+ | C9H10O3 | 167.07 | Paeonol |
| ChenAn | 289100.00 | 86070.00 | 6.42 | [M+H]+ | C17H20N4O6 | 377.15 | Riboflavin |
| ChenAn | 288300.00 | 90010.00 | 10.23 | [M+H]+ | C17H18O5 | 303.12 | Isomucronulatol |
| ChenAn | 274500.00 | 33650.00 | 1.41 | [M+H]+ | C7H11NO5 | 190.07 | N-ACETYLGLUTAMATE |
| ChenAn | 274500.00 | 33650.00 | 1.41 | [M+H]+ | C7H11NO5 | 190.07 | N-Acetylglutamic acid |
| ChenAn | 272500.00 | 73490.00 | 0.96 | [M+H]+ | C6H14O6 | 183.09 | Galactitol |
| ChenAn | 272500.00 | 73490.00 | 0.96 | [M+H]+ | C6H14O6 | 183.09 | Mannitol |
| ChenAn | 272500.00 | 73490.00 | 0.96 | [M+H]+ | C6H14O6 | 183.09 | Sorbitol |
| ChenAn | 267500.00 | 71780.00 | 0.96 | [M+H]+ | C6H14O6 | 183.09 | D-Sorbitol |
| ChenAn | 265000.00 | 78700.00 | 6.42 | [M+H]+ | C17H20N4O6 | 377.15 | Vitamin B2 |
| ChenAn | 264300.00 | 39610.00 | 6.53 | [M+H]+ | C18H16O8 | 361.09 | ROSMARINATE |
| ChenAn | 258400.00 | 56130.00 | 1.18 | [M+H]+ | C6H6O3 | 127.04 | Maltol |
| ChenAn | 255900.00 | 62550.00 | 10.77 | [M+H]+ | C16H12O5 | 285.08 | Genkwanin |
| ChenAn | 255900.00 | 62550.00 | 10.77 | [M+H]+ | C16H12O5 | 285.08 | Acacetin |
| ChenAn | 255900.00 | 62550.00 | 10.77 | [M+H]+ | C16H12O5 | 285.08 | Glycetein |
| ChenAn | 253900.00 | 62050.00 | 10.77 | [M+H]+ | C16H13ClN2O | 285.08 | Mazindol |
| ChenAn | 252800.00 | 74340.00 | 8.61 | [M+H]+ | C22H22O10 | 447.13 | Calycosin-7-o-glucoside |
| ChenAn | 252800.00 | 74340.00 | 8.61 | [M+H]+ | C22H22O10 | 447.13 | Glycitin |
| ChenAn | 249400.00 | 56220.00 | 9.43 | [M+H]+ | C16H12O6 | 301.07 | Kaempferide |
| ChenAn | 249400.00 | 56220.00 | 9.43 | [M+H]+ | C16H12O6 | 301.07 | Kaempferide |
| ChenAn | 249400.00 | 56220.00 | 9.43 | [M+H]+ | C16H12O6 | 301.07 | Hydroxygenkwanin |
| ChenAn | 249400.00 | 56220.00 | 9.43 | [M+H]+ | C16H12O6 | 301.07 | Diosmetin |
| ChenAn | 247700.00 | 55500.00 | 1.17 | [M+H]+ | C6H6O3 | 127.04 | 2,3-Dimethylmaleic anhydride |
| ChenAn | 247700.00 | 55500.00 | 1.17 | [M+H]+ | C6H6O3 | 127.04 | 5-Hydroxymethylfurfural |
| ChenAn | 244100.00 | 46570.00 | 5.35 | [M+H]+ | C9H17NO5 | 220.12 | PANTOTHENATE |
| ChenAn | 244100.00 | 46570.00 | 5.35 | [M+H]+ | C9H17NO5 | 220.12 | Pantothenic acid |
| ChenAn | 241200.00 | 27830.00 | 4.84 | [M+H]+ | C6H8O4 | 145.05 | 3-Hexenedioic acid |
| ChenAn | 237400.00 | 36050.00 | 1.76 | [M+H]+ | C5H5N5 | 136.06 | ADENINE |
| ChenAn | 237400.00 | 36050.00 | 1.76 | [M+H]+ | C5H5N5 | 136.06 | Adenine |
| ChenAn | 228700.00 | 55920.00 | 7.46 | [M+H]+ | C21H20O11 | 449.11 | Luteoloside |
| ChenAn | 228700.00 | 55920.00 | 7.46 | [M+H]+ | C21H20O11 | 449.11 | Cyanidin-3-O-glucoside |
| ChenAn | 228700.00 | 55920.00 | 7.46 | [M+H]+ | C21H20O11 | 449.11 | Astragalin |
| ChenAn | 228400.00 | 32340.00 | 2.12 | [M+H]+ | C6H8O7 | 193.03 | Citric acid |
| ChenAn | 220400.00 | 42250.00 | 6.56 | [M+H]+ | C28H34O15 | 611.22 | Hesperidin |
| ChenAn | 218700.00 | 49580.00 | 9.66 | [M+H]+ | C30H46O3 | 455.35 | Betulonicacid |
| ChenAn | 217900.00 | 42830.00 | 10.96 | [M+H]+ | C18H26O2 | 275.20 | a-Nortestosteron |
| ChenAn | 217900.00 | 42830.00 | 10.96 | [M+H]+ | C18H26O2 | 275.20 | Nandrolon |
| ChenAn | 217900.00 | 42830.00 | 10.96 | [M+H]+ | C18H26O2 | 275.20 | Nandrolone |
| ChenAn | 217800.00 | 63320.00 | 7.38 | [M+H]+ | C10H10O4 | 195.06 | FERULATE |
| ChenAn | 217800.00 | 63320.00 | 7.38 | [M+H]+ | C10H10O4 | 195.06 | Isoferulic acid |
| ChenAn | 217800.00 | 63320.00 | 7.38 | [M+H]+ | C10H10O4 | 195.06 | trans-Ferulic acid |
| ChenAn | 211900.00 | 61640.00 | 7.38 | [M+H]+ | C10H10O4 | 195.06 | Isoferulic acid |
| ChenAn | 211900.00 | 61640.00 | 7.38 | [M+H]+ | C10H10O4 | 195.06 | Ferulic Acid |
| ChenAn | 203100.00 | 50350.00 | 4.87 | [M+H]+ | C10H12N5O7P | 346.05 | CYCLIC GMP |
| ChenAn | 189600.00 | 51190.00 | 7.74 | [M+H]+ | C21H18O12 | 463.09 | Luteolin-7-O-β-D-glucuronide |
| ChenAn | 189600.00 | 51190.00 | 7.74 | [M+H]+ | C21H18O12 | 463.09 | Scutellarin |
| ChenAn | 188300.00 | 17610.00 | 4.07 | [M+H]+ | C10H12N5O6P | 330.06 | CYCLIC AMP |
| ChenAn | 183000.00 | 45230.00 | 1.18 | [M+H]+ | C12H22O11 | 343.12 | Alpha-Lactose |
| ChenAn | 183000.00 | 45230.00 | 1.18 | [M+H]+ | C12H22O11 | 343.12 | LACTOSE |
| ChenAn | 181000.00 | 51830.00 | 14.02 | [M+H]+ | C24H28O4 | 381.21 | Levistilide A |
| ChenAn | 180700.00 | 46480.00 | 6.11 | [M+H]+ | (HO)2C6H3CHO | 139.04 | Protocatechuic Aldehyde |
| ChenAn | 178300.00 | 48720.00 | 8.42 | [M+H]+ | C9H8O2 | 149.06 | Cinnamic acid |
| ChenAn | 177900.00 | 56550.00 | 9.66 | [M+H]+ | C41H68O14 | 785.47 | Astragaloside Ⅳ |
| ChenAn | 177200.00 | 45690.00 | 6.11 | [M+H]+ | C7H6O3 | 139.04 | Protocatechuic aldehyde |
| ChenAn | 177000.00 | 29440.00 | 5.35 | [M+H]+ | CH3OC6H4CO2H | 153.05 | Anisic acid |
| ChenAn | 177000.00 | 29440.00 | 5.35 | [M+H]+ | C8H8O3 | 153.05 | Phenoxyacetic acid |
| ChenAn | 177000.00 | 29440.00 | 5.35 | [M+H]+ | C8H8O3 | 153.05 | Phenoxyacetic acid |
| ChenAn | 175500.00 | 44290.00 | 7.49 | [M+H]+ | C22H24O10 | 449.14 | Licoagroside D |
| ChenAn | 174300.00 | 31850.00 | 5.49 | [M+H]+ | C17H24O11.NH3 | 422.17 | Deacetyl asperulosidic acid methyl ester +NH3 |
| ChenAn | 174300.00 | 31850.00 | 5.49 | [M+H]+ | C17H24O11.NH3 | 422.17 | Gardenoside +NH3 |
| ChenAn | 173900.00 | 16380.00 | 4.07 | [M+H]+ | C10H12N5O6P | 330.06 | Adenosine 2,3-cyclic phosphate |
| ChenAn | 173900.00 | 16380.00 | 4.07 | [M+H]+ | C10H12N5O6P | 330.06 | cAMP |
| ChenAn | 170300.00 | 32940.00 | 1.35 | [M+H]+ | C9H12N2O6 | 245.08 | URIDINE |
| ChenAn | 158100.00 | 39710.00 | 8.80 | [M+H]+ | C10H14O | 151.11 | (+)-(S)-Carvone |
| ChenAn | 158100.00 | 39710.00 | 8.80 | [M+H]+ | [(CH3)2CH]C6H3(CH3)OH | 151.11 | Thymol |
| ChenAn | 157200.00 | 44530.00 | 7.60 | [M+H]+ | C21H18O11 | 447.09 | Apigenin 7-O-beta-D-glucuronide |
| ChenAn | 156600.00 | 43480.00 | 7.42 | [M+H]+ | C10H8O4 | 193.05 | Isoscopoletin |
| ChenAn | 156600.00 | 43480.00 | 7.42 | [M+H]+ | C10H8O4 | 193.05 | Scopoletin |
| ChenAn | 156600.00 | 43480.00 | 7.42 | [M+H]+ | C10H8O4 | 193.05 | Isoscopolamine |
| ChenAn | 155300.00 | 48040.00 | 11.32 | [M+H]+ | C12H16O2 | 193.12 | 3-N-butyl-4,5-dihydrophthalide |
| ChenAn | 152700.00 | 39100.00 | 8.81 | [M+H]+ | C10H14O | 151.11 | #NAME? |
| ChenAn | 147400.00 | 23770.00 | 6.56 | [M+H]+ | C21H20O11 | 449.11 | Quercitrin |
| ChenAn | 147400.00 | 23770.00 | 6.56 | [M+H]+ | C21H20O11 | 449.11 | Quercetin 7-rhamnoside; Vincetoxicoside B |
| ChenAn | 147400.00 | 23770.00 | 6.56 | [M+H]+ | C21H20O11 | 449.11 | Rhodionin |
| ChenAn | 144200.00 | 34060.00 | 7.51 | [M+H]+ | C16H12O7 | 317.07 | Isorhamnetin |
| ChenAn | 144100.00 | 40690.00 | 15.16 | [M+H]+ | C30H46O3 | 455.35 | Betulonicacid |
| ChenAn | 143100.00 | 23510.00 | 5.29 | [M+H]+ | C6H6O3 | 127.04 | Maltol |
| ChenAn | 142800.00 | 41760.00 | 11.77 | [M+H]+ | C18H30O2 | 279.23 | GAMMA-LINOLENATE |
| ChenAn | 139400.00 | 31470.00 | 6.48 | [M+H]+ | C13H20O3 | 225.15 | METHYL JASMONATE |
| ChenAn | 139300.00 | 44660.00 | 1.28 | [M+H]+ | C5H11N3O2 | 146.09 | 4-GUANIDINOBUTANOATE |
| ChenAn | 139300.00 | 44660.00 | 1.28 | [M+H]+ | C5H11N3O2 | 146.09 | 4-Guanidinobutanoic acid |
| ChenAn | 132400.00 | 36390.00 | 6.50 | [M+H]+ | C9H8O4 | 181.05 | Caffeic acid |
| ChenAn | 131400.00 | 39050.00 | 8.04 | [M+H]+ | C16H12O4 | 269.08 | Formononetin |
| ChenAn | 131100.00 | 38810.00 | 6.16 | [M+H]+ | C15H14O6 | 291.09 | Epicatechin |
| ChenAn | 130300.00 | 32460.00 | 10.61 | [M+H]+ | C6H4[CO2CH2CH(CH3)2]2 | 279.16 | DIISOBUTYL PHTHALATE |
| ChenAn | 129900.00 | 34660.00 | 10.88 | [M+H]+ | C18H16O7 | 345.10 | Lysionotin |
| ChenAn | 129600.00 | 24040.00 | 8.90 | [M+H]+ | C10H10O3 | 179.07 | 4-Methoxycinnamic acid |
| ChenAn | 128800.00 | 22880.00 | 5.29 | [M+H]+ | C6H6O3 | 127.04 | 5-Hydroxymethylfurfural |
| ChenAn | 126600.00 | 31620.00 | 8.93 | [M+H]+ | C30H46O3 | 455.35 | Betulonicacid |
| ChenAn | 122400.00 | 6436.00 | 2.69 | [M+H]+ | C16H22O11.NH3 | 408.15 | 10-Deacetylasperulosidic acid +NH3 |
| ChenAn | 121800.00 | 10670.00 | 14.04 | [M+H]+ | C6H4[CO2CH2CH(CH3)2]2 | 279.16 | DIISOBUTYL PHTHALATE |
| ChenAn | 121200.00 | 33510.00 | 6.43 | [M+H]+ | (CH3)2CCHCH2CH2C(CH3)CHCHO | 153.13 | cis-Citral |
| ChenAn | 121200.00 | 33510.00 | 6.43 | [M+H]+ | C10H16O | 153.13 | Camphor; |
| ChenAn | 121200.00 | 33510.00 | 6.43 | [M+H]+ | C10H16O | 153.13 | Pulegone |
| ChenAn | 120500.00 | 30540.00 | 10.61 | [M+H]+ | C6H4[CO2(CH2)3CH3]2 | 279.16 | Dibutyl phthalate |
| ChenAn | 119400.00 | 36180.00 | 6.16 | [M+H]+ | C15H14O6 | 291.09 | Epicatechine |
| ChenAn | 119400.00 | 36180.00 | 6.16 | [M+H]+ | C15H14O6 | 291.09 | Catechin |
| ChenAn | 119400.00 | 36180.00 | 6.16 | [M+H]+ | C15H14O6 | 291.09 | Epicatechin |
| ChenAn | 117600.00 | 22530.00 | 9.46 | [M+H]+ | C15H24O2 | 237.19 | Curdione |
| ChenAn | 117600.00 | 22530.00 | 9.46 | [M+H]+ | C15H24O2 | 237.19 | Curcumol |
| ChenAn | 116900.00 | 28440.00 | 17.48 | [M+H]+ | C24H38O4 | 391.28 | BIS(2-ETHYLHEXYL)PHTHALATE |
| ChenAn | 113700.00 | 25620.00 | 11.53 | [M+H]+ | (CH3)2CCHCH2CH2C(CH3)CHCHO | 153.13 | cis-Citral |
| ChenAn | 113700.00 | 25620.00 | 11.53 | [M+H]+ | C10H16O | 153.13 | Camphor; |
| ChenAn | 113700.00 | 25620.00 | 11.53 | [M+H]+ | C10H16O | 153.13 | Pulegone |
| ChenAn | 113400.00 | 33750.00 | 7.14 | [M+H]+ | C9H8O3 | 165.05 | 4-COUMARATE |
| ChenAn | 112900.00 | 31670.00 | 7.33 | [M+H]+ | C27H30O14 | 579.17 | Rhoifolin |
| ChenAn | 112900.00 | 31670.00 | 7.33 | [M+H]+ | C27H30O14 | 579.17 | Rhoifolin |
| ChenAn | 112300.00 | 35780.00 | 6.21 | [M+H]+ | C10H7NH2 | 144.08 | 1-NAPHTHYLAMINE |
| ChenAn | 110500.00 | 30520.00 | 14.23 | [M+H]+ | C15H24 | 205.20 | Patchouli alcohol (loss H20) |
| ChenAn | 109900.00 | 14470.00 | 2.13 | [M+H]+ | C10H14N5O7P | 348.07 | Adenosine monophosphate |
| ChenAn | 106600.00 | 10280.00 | 3.38 | [M+H]+ | C9H12N2O6 | 245.08 | URIDINE |
| ChenAn | 106500.00 | 23230.00 | 8.62 | [M+H]+ | C15H10O6 | 287.05 | Kaempferol |
| ChenAn | 106500.00 | 23230.00 | 8.62 | [M+H]+ | C15H10O6 | 287.05 | Luteolin |
| ChenAn | 106400.00 | 19650.00 | 6.78 | [M+H]+ | C10H8O2 | 161.06 | 6-Methylcoumarin |
| ChenAn | 102600.00 | 28620.00 | 8.42 | [M+H]+ | C17H18O5 | 303.12 | Isomucronulatol |
| ChenAn | 99470.00 | 11420.00 | 5.39 | [M+H]+ | C7H11NO3 | 158.08 | N-ACETYLPROLINE |
| ChenAn | 99150.00 | 10820.00 | 2.73 | [M+H]+ | C7H11NO5 | 190.07 | N-ACETYLGLUTAMATE |
| ChenAn | 99150.00 | 10820.00 | 2.73 | [M+H]+ | C7H11NO5 | 190.07 | N-Acetylglutamic acid |
| ChenAn | 98560.00 | 27120.00 | 8.22 | [M+H]+ | C20H17NO4 | 336.12 | Berberine hydrochloride |
| ChenAn | 98090.00 | 12440.00 | 11.56 | [M+H]+ | C30H48O5 | 489.36 | Asiatic acid |
| ChenAn | 97550.00 | 11280.00 | 5.39 | [M+H]+ | C7H11NO3 | 158.08 | N-Acetyl-L-proline |
| ChenAn | 96610.00 | 8469.00 | 14.34 | [M+H]+ | C6H4[CO2(CH2)3CH3]2 | 279.16 | Dibutyl phthalate |
| ChenAn | 96250.00 | 29980.00 | 13.93 | [M+H]+ | C24H28O4.NH3 | 398.23 | Levistilide A +NH4 |
| ChenAn | 96050.00 | 23210.00 | 10.92 | [M+H]+ | C17H19NO4 | 302.15 | Noroxycodone |
| ChenAn | 95840.00 | 23570.00 | 7.26 | [M+H]+ | C30H26O13 | 595.17 | Tiliroside |
| ChenAn | 92380.00 | 4622.00 | 3.86 | [M+H]+ | C6H6O3 | 127.04 | Maltol |
| ChenAn | 91520.00 | 28200.00 | 7.99 | [M+H]+ | C21H18O11 | 447.09 | Apigenin 7-O-beta-D-glucuronide |
| ChenAn | 91440.00 | 23640.00 | 4.93 | [M+H]+ | C5H5N5 | 136.06 | ADENINE |
| ChenAn | 90570.00 | 27600.00 | 0.95 | [M+H]+ | C4H9NO2 | 104.07 | 2-AMINOISOBUTYRATE |
| ChenAn | 90570.00 | 27600.00 | 0.95 | [M+H]+ | C4H9NO2 | 104.07 | AMINOISOBUTANOATE |
| ChenAn | 90570.00 | 27600.00 | 0.95 | [M+H]+ | C2H5CH(NH2)CO2H | 104.07 | DL-2-Aminobutyric acid |
| ChenAn | 90380.00 | 24140.00 | 6.70 | [M+H]+ | C22H28O11 | 469.17 | Prim-O-glucosylcimifugin |
| ChenAn | 90020.00 | 16780.00 | 7.71 | [M+H]+ | C9H8O4 | 181.05 | Caffeic acid |
| ChenAn | 89600.00 | 16650.00 | 5.46 | [M+H]+ | C8H11NO3 | 170.08 | 6-HYDROXYDOPAMINE |
| ChenAn | 89600.00 | 16650.00 | 5.46 | [M+H]+ | C8H11NO3 | 170.08 | NORADRENALINE |
| ChenAn | 89600.00 | 16650.00 | 5.46 | [M+H]+ | C8H11NO3 | 170.08 | Pyridoxine_ |
| ChenAn | 87600.00 | 24800.00 | 8.89 | [M+H]+ | (CH3)2CCHCH2CH2C(CH3)CHCHO | 153.13 | cis-Citral |
| ChenAn | 87600.00 | 24800.00 | 8.89 | [M+H]+ | C10H16O | 153.13 | Camphor; |
| ChenAn | 87600.00 | 24800.00 | 8.89 | [M+H]+ | C10H16O | 153.13 | Pulegone |
| ChenAn | 87070.00 | 26430.00 | 0.95 | [M+H]+ | (CH3)2C(NH2)COOH | 104.07 | 2-Aminoisobutyric Acid |
| ChenAn | 87070.00 | 26430.00 | 0.95 | [M+H]+ | CH3CH(NH2)CH2COOH | 104.07 | 3-Aminobutyric acid |
| ChenAn | 87070.00 | 26430.00 | 0.95 | [M+H]+ | C4H9NO2 | 104.07 | N-Methyl-L-alanine |
| ChenAn | 86590.00 | 23420.00 | 4.93 | [M+H]+ | C5H5N5 | 136.06 | ADENINE |
| ChenAn | 86590.00 | 23420.00 | 4.93 | [M+H]+ | C5H5N5 | 136.06 | Adenine |
| ChenAn | 85350.00 | 16110.00 | 5.46 | [M+H]+ | C8H11NO3 | 170.08 | Pyridoxine_ |
| ChenAn | 83210.00 | 24550.00 | 12.79 | [M+H]+ | C18H30O2 | 279.23 | GAMMA-LINOLENATE |
| ChenAn | 83150.00 | 24470.00 | 6.69 | [M+H]+ | C20H42O11NH3 | 476.31 | PEG-10mer Ammonium adduct |
| ChenAn | 82480.00 | 9579.00 | 5.15 | [M+H]+ | C16H18O9 | 355.10 | Chlorogenic acid |
| ChenAn | 81530.00 | 22490.00 | 8.64 | [M+H]+ | C15H10O7 | 303.05 | Quercetin |
| ChenAn | 80850.00 | 22700.00 | 5.81 | [M+H]+ | C22H30N6O4S | 475.22 | Sildenafil |
| ChenAn | 79980.00 | 12340.00 | 10.03 | [M+H]+ | C18H26O2 | 275.20 | a-Nortestosteron |
| ChenAn | 79980.00 | 12340.00 | 10.03 | [M+H]+ | C18H26O2 | 275.20 | Nandrolon |
| ChenAn | 79980.00 | 12340.00 | 10.03 | [M+H]+ | C18H26O2 | 275.20 | Nandrolon |
| ChenAn | 78200.00 | 8192.00 | 5.00 | [M+H]+ | C11H15NO2 | 194.12 | BDB |
| ChenAn | 77890.00 | 21050.00 | 11.65 | [M+H]+ | C19H26O2 | 287.20 | Androstenedione |
| ChenAn | 77890.00 | 21050.00 | 11.65 | [M+H]+ | C19H26O2 | 287.20 | Androstenedione |
| ChenAn | 77890.00 | 17270.00 | 7.17 | [M+H]+ | C10H14O2 | 167.11 | Perillic acid |
| ChenAn | 77890.00 | 5792.00 | 12.85 | [M+H]+ | C5H9NO | 100.08 | 1-Methyl-2-pyrrolidone |
| ChenAn | 77540.00 | 11680.00 | 12.74 | [M+H]+ | C18H26O2 | 275.20 | a-Nortestosteron |
| ChenAn | 77540.00 | 11680.00 | 12.74 | [M+H]+ | C18H26O2 | 275.20 | Nandrolone |
| ChenAn | 77290.00 | 21350.00 | 15.47 | [M+H]+ | C30H48O3 | 457.37 | Ursolic Acid |
| ChenAn | 77290.00 | 21350.00 | 15.47 | [M+H]+ | C30H48O3 | 457.37 | Betulinic acid |
| ChenAn | 75990.00 | 20680.00 | 7.28 | [M+H]+ | C27H32O14 | 581.19 | Narirutin |
| ChenAn | 75710.00 | 6874.00 | 3.32 | [M+H]+ | C9H10O2 | 151.08 | 4-Ethylbenzoic Acid |
| ChenAn | 75700.00 | 21160.00 | 8.64 | [M+H]+ | C15H10O7 | 303.05 | Morin hydrate |
| ChenAn | 75700.00 | 21160.00 | 8.64 | [M+H]+ | C15H10O7 | 303.05 | Quercetin |
| ChenAn | 75390.00 | 10540.00 | 1.81 | [M+H]+ | C5H5N5O | 152.06 | GUANINE |
| ChenAn | 74990.00 | 24330.00 | 1.28 | [M+H]+ | C7H15NO2 | 146.12 | DEOXYCARNITINE |
| ChenAn | 74990.00 | 24330.00 | 1.28 | [M+H]+ | C7H15NO2 | 146.12 | DEOXYCARNITINE |
| ChenAn | 74090.00 | 22740.00 | 1.28 | [M+H]+ | C6H11NO3 | 146.07 | 4-Acetamidobutyric Acid |
| ChenAn | 74090.00 | 22740.00 | 1.28 | [M+H]+ | C6H11NO3 | 146.07 | 4-Acetamidobutyric Acid |
| ChenAn | 73390.00 | 21910.00 | 6.08 | [M+H]+ | CH3(CH2)7NH2 | 130.16 | Octylamine |
| ChenAn | 73200.00 | 19000.00 | 8.51 | [M+H]+ | C10H12O | 149.10 | Anise oil |
| ChenAn | 73170.00 | 15260.00 | 6.04 | [M+H]+ | C10H7NO3 | 190.05 | KYNURENATE |
| ChenAn | 73140.00 | 17780.00 | 6.53 | [M+H]+ | C18H38O10NH3 | 432.28 | PEG-9mer Ammonium adduct |
| ChenAn | 73020.00 | 16720.00 | 7.26 | [M+H]+ | C9H10O2 | 151.07 | Hydrocinnamic acid |
| ChenAn | 72780.00 | 20560.00 | 8.61 | [M+H]+ | C15H10O6 | 287.05 | Kaempferol |
| ChenAn | 72780.00 | 20560.00 | 8.61 | [M+H]+ | C15H10O6 | 287.05 | Luteolin |
| ChenAn | 72770.00 | 17780.00 | 6.45 | [M+H]+ | C8H6O3 | 151.04 | 2-Carboxybenzaldehyde |
| ChenAn | 72370.00 | 20070.00 | 11.65 | [M+H]+ | C19H26O2 | 287.20 | Androstenedione |
| ChenAn | 71780.00 | 4509.00 | 14.05 | [M+H]+ | C4H8O2 | 89.06 | ACETOIN |
| ChenAn | 71780.00 | 4509.00 | 14.05 | [M+H]+ | C4H8O2 | 89.06 | BUTANOATE |
| ChenAn | 71780.00 | 4509.00 | 14.05 | [M+H]+ | C4H8O2 | 89.06 | ISOBUTYRATE |
| ChenAn | 71410.00 | 17420.00 | 1.29 | [M+H]+ | C10H14N5O7P | 348.07 | Adenosine monophosphate |
| ChenAn | 70620.00 | 23060.00 | 8.13 | [M+H]+ | C12H16O4 | 225.11 | Senkyunolide I |
| ChenAn | 70390.00 | 8012.00 | 3.42 | [M+H]+ | C10H14N5O7P | 348.07 | Adenosine monophosphate |
| ChenAn | 70300.00 | 19550.00 | 10.44 | [M+H]+ | C13H22O3 | 227.16 | Methyl dihydrojasmonate |
| ChenAn | 70160.00 | 18890.00 | 6.44 | [M+H]+ | C10H18O2 | 171.14 | Linalool oxide |
| ChenAn | 70090.00 | 17760.00 | 8.81 | [M+H]+ | C16H12O6 | 301.07 | Tectorigenin |
| ChenAn | 68210.00 | 10080.00 | 5.20 | [M+H]+ | C10H14N2O5 | 243.10 | THYMIDINE |
| ChenAn | 67230.00 | 18880.00 | 9.24 | [M+H]+ | C15H10O5 | 271.06 | Genistein |
| ChenAn | 67200.00 | 19710.00 | 7.20 | [M+H]+ | HOC6H4CO2CH3 | 153.05 | Methylparaben |
| ChenAn | 66920.00 | 7525.00 | 14.09 | [M+H]+ | C5H9NO | 100.08 | 1-Methyl-2-pyrrolidone |
| ChenAn | 66300.00 | 19430.00 | 1.17 | [M+H]+ | C6H5NO2 | 124.04 | NICOTINATE |
| ChenAn | 66300.00 | 19430.00 | 1.17 | [M+H]+ | C6H5NO2 | 124.04 | Nicotinic acid |
| ChenAn | 66270.00 | 19320.00 | 1.17 | [M+H]+ | C6H5NO2 | 124.04 | Isonicotinic acid |
| ChenAn | 66270.00 | 19320.00 | 1.17 | [M+H]+ | C6H5NO2 | 124.04 | Nicotinic acid |
| ChenAn | 66030.00 | 10280.00 | 5.15 | [M+H]+ | C9H8O2 | 149.06 | Cinnamic acid |
| ChenAn | 66030.00 | 10280.00 | 5.15 | [M+H]+ | C9H8O2 | 149.06 | trans-Cinnamic acid |
| ChenAn | 65180.00 | 22610.00 | 1.13 | [M+H]+ | C8H18N4O2 | 203.15 | N,N-DIMETHYLARGININE |
| ChenAn | 65180.00 | 22610.00 | 1.13 | [M+H]+ | C8H18N4O2 | 203.15 | N,N-DIMETHYL-ARGININE |
| ChenAn | 64410.00 | 13520.00 | 8.61 | [M+H]+ | (CH3)2CCHCH2CH2C(CH3)CHCHO | 153.13 | cis-Citral |
| ChenAn | 64410.00 | 13520.00 | 8.61 | [M+H]+ | C10H16O | 153.13 | Camphor; |
| ChenAn | 64410.00 | 13520.00 | 8.61 | [M+H]+ | C10H16O | 153.13 | Pulegone |
| ChenAn | 64260.00 | 18320.00 | 9.24 | [M+H]+ | C15H10O5 | 271.06 | Apigenin |
| ChenAn | 64260.00 | 18320.00 | 9.24 | [M+H]+ | C15H10O5 | 271.06 | Galangin |
| ChenAn | 64110.00 | 16930.00 | 10.61 | [M+H]+ | C15H22N2O3 | 279.16 | Tolycaine |
| ChenAn | 64010.00 | 8880.00 | 3.38 | [M+H]+ | C4H4N2O2 | 113.03 | URACIL |
| ChenAn | 63790.00 | 16470.00 | 7.30 | [M+H]+ | C16H12O7 | 317.07 | Isorhamnetin |
| ChenAn | 63730.00 | 19280.00 | 7.20 | [M+H]+ | CH3C6H3(OH)CO2H | 153.05 | 3-Methylsalicylic acid |
| ChenAn | 63450.00 | 15020.00 | 4.95 | [M+H]+ | C16H22O11.NH3 | 408.15 | 10-Deacetylasperulosidic acid +NH3 |
| ChenAn | 63340.00 | 11130.00 | 6.49 | [M+H]+ | C10H14O2 | 167.11 | Perillic acid |
| ChenAn | 63010.00 | 19020.00 | 6.80 | [M+H]+ | C19H21N7O6 | 444.18 | DIHYDROFOLATE |
| ChenAn | 62430.00 | 5807.00 | 2.31 | [M+H]+ | C7H13NO2 | 144.10 | Stachydrine hydrochloride |
| ChenAn | 62250.00 | 17950.00 | 15.56 | [M+H]+ | C18H32O2 | 281.25 | LINOLEATE |
| ChenAn | 61890.00 | 9847.00 | 5.15 | [M+H]+ | C9H8O2 | 149.06 | Cinnamic acid |
| ChenAn | 60370.00 | 17760.00 | 6.97 | [M+H]+ | C15H12O5 | 273.08 | Naringenin |
| ChenAn | 60190.00 | 13980.00 | 4.97 | [M+H]+ | C10H13N5O3 | 252.11 | DEOXYADENOSINE |
| ChenAn | 59920.00 | 3064.00 | 1.70 | [M+H]+ | C10H12O4 | 197.08 | Cantharidin |
| ChenAn | 59870.00 | 5552.00 | 14.05 | [M+H]+ | C15H22N2O3 | 279.16 | Tolycaine |
| ChenAn | 59570.00 | 18680.00 | 1.13 | [M+H]+ | C6H6N2O2 | 139.06 | UROCANATE |
| ChenAn | 59570.00 | 18680.00 | 1.13 | [M+H]+ | C6H6N2O2 | 139.06 | Urocanic acid |
| ChenAn | 59490.00 | 9029.00 | 5.20 | [M+H]+ | C10H14N2O5 | 243.10 | THYMIDINE |
| ChenAn | 58830.00 | 8214.00 | 7.29 | [M+H]+ | C16H18O9 | 355.11 | Chlorogenic Acid |
| ChenAn | 58830.00 | 8214.00 | 7.29 | [M+H]+ | C16H18O9 | 355.11 | Chlorogenic Acid |
| ChenAn | 58120.00 | 17570.00 | 9.42 | [M+H]+ | C16H14O6 | 303.09 | Hesperetin |
| ChenAn | 58020.00 | 9954.00 | 5.36 | [M+H]+ | C9H10O2 | 151.08 | 4-Ethylbenzoic Acid |
| ChenAn | 57250.00 | 15980.00 | 8.42 | [M+H]+ | C23H28O10 | 465.17 | Isomucronulatol-7-O-glucoside |
| ChenAn | 57130.00 | 18310.00 | 5.64 | [M+H]+ | C11H15N5O3S | 298.10 | METHYLTHIOADENOSINE |
| ChenAn | 57100.00 | 10500.00 | 5.85 | [M+H]+ | C15H16O9 | 341.09 | Esculin |
| ChenAn | 57100.00 | 10500.00 | 5.85 | [M+H]+ | C15H16O9 | 341.09 | Esculin hydrate |
| ChenAn | 56910.00 | 14840.00 | 11.92 | [M+H]+ | HOC6H4CO2(CH2)3CH3 | 195.10 | Butylparaben |
| ChenAn | 56830.00 | 9241.00 | 6.56 | [M+H]+ | C9H6O2 | 147.04 | Coumarin |
| ChenAn | 55540.00 | 4637.00 | 3.80 | [M+H]+ | C6H6O3 | 127.04 | 2,3-Dimethylmaleic anhydride |
| ChenAn | 55540.00 | 4637.00 | 3.80 | [M+H]+ | C6H6O3 | 127.04 | 5-Hydroxymethylfurfural |
| ChenAn | 55370.00 | 15960.00 | 7.49 | [M+H]+ | C16H14O6 | 303.09 | Hesperetin |
| ChenAn | 54850.00 | 14730.00 | 6.86 | [M+H]+ | C12H14O2 | 191.11 | Ligustilide |
| ChenAn | 54280.00 | 17370.00 | 5.64 | [M+H]+ | C11H15N5O3S | 298.10 | 5-Methylthioadenosine |
| ChenAn | 54120.00 | 6501.00 | 12.29 | [M+H]+ | C5H9NO | 100.08 | 1-Methyl-2-pyrrolidone |
| ChenAn | 54060.00 | 13820.00 | 5.85 | [M+H]+ | C30H26O12 | 579.15 | Procyanidin B2 |
| ChenAn | 53970.00 | 11250.00 | 6.44 | [M+H]+ | CH3C6H4CH(CH3)2 | 135.12 | p-Cymene |
| ChenAn | 53460.00 | 16690.00 | 8.92 | [M+H]+ | C9H8O2 | 149.06 | Cinnamic acid |
| ChenAn | 53460.00 | 16690.00 | 8.92 | [M+H]+ | C9H8O2 | 149.06 | trans-Cinnamic acid |
| ChenAn | 52810.00 | 14230.00 | 10.24 | [M+H]+ | C10H14O | 151.11 | (+)-(S)-Carvone |
| ChenAn | 52810.00 | 14230.00 | 10.24 | [M+H]+ | [(CH3)2CH]C6H3(CH3)OH | 151.11 | Thymol |
| ChenAn | 52600.00 | 16180.00 | 6.84 | [M+H]+ | C22H46O12NH3 | 520.33 | PEG-11mer Ammonium adduct |
| ChenAn | 52560.00 | 6354.00 | 1.38 | [M+H]+ | C5H4N4O2 | 153.04 | XANTHINE |
| ChenAn | 51970.00 | 5537.00 | 11.98 | [M+H]+ | C6H4[CO2(CH2)3CH3]2 | 279.16 | Dibutyl phthalate |
| ChenAn | 51770.00 | 8828.00 | 9.24 | [M+H]+ | C15H24O3 | 253.18 | 15-Hydroxyculmorone |
| ChenAn | 51580.00 | 14180.00 | 10.24 | [M+H]+ | C10H14O | 151.11 | #NAME? |
| ChenAn | 51260.00 | 13850.00 | 5.69 | [M+H]+ | C6H6O4 | 143.03 | Kojic acid |
| ChenAn | 50730.00 | 10870.00 | 12.31 | [M+H]+ | C30H48O5 | 489.36 | Asiatic acid |
| ChenAn | 50430.00 | 16300.00 | 8.92 | [M+H]+ | C9H8O2 | 149.06 | Cinnamic acid |
| ChenAn | 50190.00 | 12860.00 | 6.36 | [M+H]+ | C12H14O2 | 191.11 | Ligustilide |
| ChenAn | 50070.00 | 5540.00 | 1.88 | [M+H]+ | C6H5NO2 | 124.04 | Isonicotinic acid |
| ChenAn | 50070.00 | 5540.00 | 1.88 | [M+H]+ | C6H5NO2 | 124.04 | Nicotinic acid |
| ChenAn | 49830.00 | 10090.00 | 13.29 | [M+H]+ | C30H48O4 | 473.36 | Corosolic acid |
| ChenAn | 48710.00 | 8603.00 | 7.62 | [M+H]+ | C10H18O2 | 171.14 | Linalool oxide |
| ChenAn | 48520.00 | 6553.00 | 5.39 | [M+H]+ | C8H8O4 | 169.05 | 3,4-DIHYDROXYPHENYLACETATE |
| ChenAn | 48520.00 | 6553.00 | 5.39 | [M+H]+ | C8H8O4 | 169.05 | 3,4-DIHYDROXYPHENYLACETATE |
| ChenAn | 48520.00 | 6553.00 | 5.39 | [M+H]+ | C8H8O4 | 169.05 | HOMOGENTISATE |
| ChenAn | 48520.00 | 6553.00 | 5.39 | [M+H]+ | C8H8O4 | 169.05 | HOMOGENTISATE |
| ChenAn | 48320.00 | 7953.00 | 5.28 | [M+H]+ | C9H12O4 | 185.08 | 4-HYDROXY-3-METHOXYPHENYLGLYCOL |
| ChenAn | 47600.00 | 14040.00 | 6.06 | [M+H]+ | C17H24O9.NH3 | 390.17 | Syringin +NH3 |
| ChenAn | 47600.00 | 14040.00 | 6.06 | [M+H]+ | C17H24O9.NH3 | 390.17 | Syringin +NH3 |
| ChenAn | 47600.00 | 14040.00 | 6.06 | [M+H]+ | C17H24O9.NH3 | 390.17 | Syringa vulgaris + NH3 |
| ChenAn | 47600.00 | 14040.00 | 6.06 | [M+H]+ | C17H24O9.NH3 | 390.17 | Syringa vulgaris + NH3 |
| ChenAn | 47090.00 | 3635.00 | 11.83 | [M+H]+ | HOCH2CH2CH(OH)CH2OH | 107.07 | 1,2,4-Butanetriol |
| ChenAn | 46980.00 | 13890.00 | 7.52 | [M+H]+ | C11H10O5 | 223.06 | 8-hydroxy-6,7-dimethoxycoumarin |
| ChenAn | 46980.00 | 13890.00 | 7.52 | [M+H]+ | C11H10O5 | 223.06 | Isofraxidin |
| ChenAn | 46760.00 | 12910.00 | 13.56 | [M+H]+ | C30H48O4 | 473.36 | Corosolic acid |
| ChenAn | 46260.00 | 10150.00 | 5.81 | [M+H]+ | C18H22O11 | 415.12 | Asperuloside |
| ChenAn | 46030.00 | 11390.00 | 6.46 | [M+H]+ | C13H22O3 | 227.16 | Methyl dihydrojasmonate |
| ChenAn | 45580.00 | 8996.00 | 6.05 | [M+H]+ | C10H8O2 | 161.06 | 6-Methylcoumarin |
| ChenAn | 45430.00 | 7089.00 | 5.82 | [M+H]+ | C9H6O2 | 147.04 | Coumarin |
| ChenAn | 45270.00 | 6297.00 | 5.39 | [M+H]+ | C8H8O4 | 169.05 | Griffonilide |
| ChenAn | 45270.00 | 6297.00 | 5.39 | [M+H]+ | C8H8O4 | 169.05 | Griffonilide |
| ChenAn | 45080.00 | 12750.00 | 5.63 | [M+H]+ | C8H8O2 | 137.06 | o-Toluic acid |
| ChenAn | 45010.00 | 3642.00 | 4.55 | [M+H]+ | C10H12O4 | 197.08 | Cantharidin |
| ChenAn | 44850.00 | 5252.00 | 2.13 | [M+H]+ | C6H6N2O | 123.05 | NICOTINAMIDE |
| ChenAn | 44850.00 | 5252.00 | 2.13 | [M+H]+ | C6H6N2O | 123.05 | Nicotinamide |
| ChenAn | 44750.00 | 7555.00 | 5.35 | [M+H]+ | C11H22N2O4S | 279.14 | Pantetheine |
| ChenAn | 44660.00 | 6554.00 | 5.35 | [M+H]+ | C6H4[CO2CH2CH(CH3)2]2 | 279.16 | DIISOBUTYL PHTHALATE |
| ChenAn | 44640.00 | 7462.00 | 6.18 | [M+H]+ | C12H24O11 | 345.14 | Maltitol |
| ChenAn | 44150.00 | 13680.00 | 6.48 | [M+H]+ | C9H6O4 | 179.03 | Daphnetin |
| ChenAn | 44150.00 | 13680.00 | 6.48 | [M+H]+ | C9H6O4 | 179.03 | Esculetin |
| ChenAn | 43970.00 | 7501.00 | 5.35 | [M+H]+ | C14H18N2O4 | 279.13 | Oxadixyl |
| ChenAn | 43900.00 | 5467.00 | 1.88 | [M+H]+ | C6H5NO2 | 124.04 | NICOTINATE |
| ChenAn | 43900.00 | 5467.00 | 1.88 | [M+H]+ | C6H5NO2 | 124.04 | Nicotinic acid |
| ChenAn | 43900.00 | 5467.00 | 1.88 | [M+H]+ | C6H5NO2 | 124.04 | Picolinic acid |
| ChenAn | 43680.00 | 15460.00 | 19.48 | [M+H]+ | C11H15NO2 | 194.12 | BDB |
| ChenAn | 43640.00 | 7616.00 | 5.28 | [M+H]+ | C9H12O4 | 185.08 | Asperlactone |
| ChenAn | 43640.00 | 7616.00 | 5.28 | [M+H]+ | C9H12O4 | 185.08 | Aspyrone |
| ChenAn | 42960.00 | 9739.00 | 4.93 | [M+H]+ | C10H14N5O7P | 348.07 | Adenosine monophosphate |
| ChenAn | 42600.00 | 9844.00 | 7.86 | [M+H]+ | C10H12O2 | 165.09 | Isoeugenol |
| ChenAn | 42480.00 | 10560.00 | 6.58 | [M+H]+ | C26H28O14 | 565.15 | Schaftoside |
| ChenAn | 41880.00 | 11130.00 | 6.33 | [M+H]+ | C9H10O3 | 167.07 | 3-(2-HYDROXYPHENYL)PROPANOATE |
| ChenAn | 41880.00 | 11130.00 | 6.33 | [M+H]+ | (HO)C6H4CO2C2H5 | 167.07 | Ethylsalicylate |
| ChenAn | 41550.00 | 4157.00 | 4.03 | [M+H]+ | C10H14N5O8P | 364.07 | GUANOSINE MONOPHOSPHATE |
| ChenAn | 41270.00 | 11500.00 | 11.44 | [M+H]+ | C15H10O4 | 255.07 | Chrysophanol |
| ChenAn | 41270.00 | 11500.00 | 11.44 | [M+H]+ | C15H10O4 | 255.07 | Daidzein |
| ChenAn | 41270.00 | 11500.00 | 11.44 | [M+H]+ | C15H10O4 | 255.07 | Chrysophanol |
| ChenAn | 40470.00 | 5830.00 | 7.77 | [M+H]+ | C15H22O3 | 251.16 | Nardosinone |
| ChenAn | 40420.00 | 3709.00 | 7.93 | [M+H]+ | C15H22N2O3 | 279.16 | Tolycaine |
| ChenAn | 40230.00 | 8684.00 | 13.18 | [M+H]+ | C24H28O4.NH3 | 398.23 | Levistilide A +NH4 |
| ChenAn | 39910.00 | 11260.00 | 4.98 | [M+H]+ | C10H13N5O3 | 252.11 | Cordycepin |
| ChenAn | 39890.00 | 11020.00 | 6.84 | [M+H]+ | C15H10O6 | 287.06 | Kaempferol |
| ChenAn | 39890.00 | 11020.00 | 6.84 | [M+H]+ | C15H10O6 | 287.06 | Luteolin |
| ChenAn | 39860.00 | 10950.00 | 10.32 | [M+H]+ | C29H37NO5 | 480.27 | Cytochalasin B |
| ChenAn | 39860.00 | 10950.00 | 10.32 | [M+H]+ | C29H37NO5 | 480.27 | Cytochalasin B |
| ChenAn | 39780.00 | 13520.00 | 1.22 | [M+H]+ | C7H7NO3 | 154.05 | 3-AMINO-4-HYDROXYBENZOATE |
| ChenAn | 39780.00 | 13520.00 | 1.22 | [M+H]+ | C7H7NO3 | 154.05 | 3-AMINO-5-HYDROXYBENZOATE |
| ChenAn | 39100.00 | 8355.00 | 8.49 | [M+H]+ | C15H24O2 | 237.18 | Curdione |
| ChenAn | 39100.00 | 8355.00 | 8.49 | [M+H]+ | C15H24O2 | 237.18 | Curcumol |
| ChenAn | 39090.00 | 13400.00 | 1.22 | [M+H]+ | H2NC6H3(OH)CO2H | 154.05 | 4-Aminosalicylic acid |
| ChenAn | 39090.00 | 13400.00 | 1.22 | [M+H]+ | C7H7NO3 | 154.05 | 5-Aminosalicylic_acid |
| ChenAn | 38750.00 | 10670.00 | 6.33 | [M+H]+ | C9H10O3 | 167.07 | Paeonol |
| ChenAn | 38590.00 | 11820.00 | 7.33 | [M+H]+ | C16H18O6 | 307.12 | Cimifugin |
| ChenAn | 38080.00 | 5077.00 | 2.13 | [M+H]+ | C6H6N2O | 123.05 | Isonicotinamide |
| ChenAn | 38080.00 | 5077.00 | 2.13 | [M+H]+ | C6H6N2O | 123.05 | Niacinamide |
| ChenAn | 38080.00 | 5077.00 | 2.13 | [M+H]+ | C6H6N2O | 123.05 | NICOTINAMIDE |
| ChenAn | 38060.00 | 7025.00 | 5.25 | [M+H]+ | C6H14N4O2 | 175.12 | ARGININE |
| ChenAn | 38060.00 | 7025.00 | 5.25 | [M+H]+ | C6H14N4O2 | 175.12 | L-Arginine |
| ChenAn | 37400.00 | 11060.00 | 6.54 | [M+H]+ | C8H8O4 | 169.05 | Vanillic acid |
| ChenAn | 37090.00 | 5910.00 | 5.22 | [M+H]+ | C8H10O4 | 171.06 | 3,4-DIHYDROXYPHENYLGLYCOL |
| ChenAn | 37060.00 | 2649.00 | 4.50 | [M+H]+ | C9H9NO | 148.08 | 3-METHYL-2-OXINDOLE |
| ChenAn | 36610.00 | 9168.00 | 9.18 | [M+H]+ | C15H12O5 | 273.08 | Naringenin |
| ChenAn | 36530.00 | 10020.00 | 6.84 | [M+H]+ | C15H10O6 | 287.06 | Kaempferol |
| ChenAn | 36530.00 | 10020.00 | 6.84 | [M+H]+ | C15H10O6 | 287.06 | Luteolin |
| ChenAn | 36180.00 | 3698.00 | 2.48 | [M+H]+ | C5H4N4O | 137.05 | 6-Hydroxypurine |
| ChenAn | 36080.00 | 3686.00 | 2.48 | [M+H]+ | C5H4N4O | 137.05 | HYPOXANTHINE |
| ChenAn | 36070.00 | 9053.00 | 5.69 | [M+H]+ | C10H7NH2 | 144.08 | 1-NAPHTHYLAMINE |
| ChenAn | 36040.00 | 8033.00 | 11.13 | [M+H]+ | C15H24O2 | 237.18 | Curdione |
| ChenAn | 36040.00 | 8033.00 | 11.13 | [M+H]+ | C15H24O2 | 237.18 | Curcumol |
| ChenAn | 35790.00 | 4223.00 | 6.85 | [M+H]+ | CH3C6H4CH(CH3)2 | 135.12 | p-Cymene |
| ChenAn | 35270.00 | 4561.00 | 5.49 | [M+H]+ | C10H7NO4 | 206.04 | XANTHURENATE |
| ChenAn | 34810.00 | 10580.00 | 6.97 | [M+H]+ | C10H12O | 149.10 | Anise oil |
| ChenAn | 34790.00 | 3099.00 | 14.39 | [M+H]+ | C4H8O2 | 89.06 | ACETOIN |
| ChenAn | 34790.00 | 3099.00 | 14.39 | [M+H]+ | C4H8O2 | 89.06 | BUTANOATE |
| ChenAn | 34790.00 | 3099.00 | 14.39 | [M+H]+ | C4H8O2 | 89.06 | ISOBUTYRATE |
| ChenAn | 34660.00 | 9924.00 | 7.85 | [M+H]+ | C9H7NO | 146.06 | 4-Hydroxyquinoline |
| ChenAn | 34430.00 | 5282.00 | 5.22 | [M+H]+ | C8H10O4 | 171.06 | Penicillic acid |
| ChenAn | 34300.00 | 5183.00 | 5.29 | [M+H]+ | C8H16N2O3 | 189.12 | Glycyl-L-leucine |
| ChenAn | 33910.00 | 9314.00 | 5.72 | [M+H]+ | C9H10ClNO2 | 200.05 | 2-Chloro-L-phenylalanine |
| ChenAn | 33410.00 | 6678.00 | 5.25 | [M+H]+ | C6H14N4O2 | 175.12 | L(+)-Arginine |
| ChenAn | 31690.00 | 9052.00 | 7.09 | [M+H]+ | C11H6O3 | 187.04 | Angelicin |
| ChenAn | 31690.00 | 9052.00 | 7.09 | [M+H]+ | C11H6O3 | 187.04 | Psoralen |
| ChenAn | 31620.00 | 9771.00 | 7.38 | [M+H]+ | C20H19NO5 | 354.13 | Protopine |
| ChenAn | 31620.00 | 9771.00 | 7.38 | [M+H]+ | C20H19NO5 | 354.13 | Protopine |
| ChenAn | 31400.00 | 8871.00 | 10.19 | [M+H]+ | CH3CO2CH2CH2CHCHC2H5 | 143.11 | Cis-3-Hexenylacetate |
| ChenAn | 31300.00 | 10580.00 | 1.25 | [M+H]+ | C5H5NO | 96.04 | 2-HYDROXYPYRIDINE |
| ChenAn | 31200.00 | 4644.00 | 10.65 | [M+H]+ | C15H22O3 | 251.16 | Nardosinone |
| ChenAn | 29460.00 | 5066.00 | 7.13 | [M+H]+ | C13H20O3 | 225.15 | METHYL JASMONATE |
| ChenAn | 29390.00 | 6781.00 | 6.48 | [M+H]+ | C10H12O | 149.10 | Anise oil |
| ChenAn | 29290.00 | 5134.00 | 7.29 | [M+H]+ | C16H18O9 | 355.11 | Chlorogenic acid |
| ChenAn | 28970.00 | 8229.00 | 7.02 | [M+H]+ | C29H36O15.NH3 | 642.24 | IsoActeoside +NH3 |
| ChenAn | 28970.00 | 8229.00 | 7.02 | [M+H]+ | C29H36O15.NH3 | 642.24 | Acteoside +NH3 |
| ChenAn | 28970.00 | 8229.00 | 7.02 | [M+H]+ | C29H36O15.NH3 | 642.24 | A Forsythoside A +NH3 |
| ChenAn | 28720.00 | 8376.00 | 5.75 | [M+H]+ | C14H20O7.NH3 | 318.15 | Salidroside +NH3 |
| ChenAn | 28210.00 | 7992.00 | 8.75 | [M+H]+ | C22H24O10 | 449.14 | Licoagroside D |
| ChenAn | 28170.00 | 4844.00 | 12.71 | [M+H]+ | C16H30O2 | 255.23 | PALMITOLEATE |
| ChenAn | 27840.00 | 3652.00 | 5.46 | [M+H]+ | C25H24O12 | 517.15 | 1,4-Dicaffeoylquinic Acid (Cynarin) |
| ChenAn | 27840.00 | 3652.00 | 5.46 | [M+H]+ | C25H24O12 | 517.15 | 1,5-DCQA 1,5-Dicaffeoylquinic acid |
| ChenAn | 27840.00 | 3652.00 | 5.46 | [M+H]+ | C25H24O12 | 517.15 | 3,4-DCQA Isochlorogenic acid B |
| ChenAn | 27840.00 | 3652.00 | 5.46 | [M+H]+ | C25H24O12 | 517.15 | 3,5-Dicaffeoyl quinic acid |
| ChenAn | 27840.00 | 3652.00 | 5.46 | [M+H]+ | C25H24O12 | 517.15 | 3,5-DCQA Isochlorogenic acid A |
| ChenAn | 27840.00 | 3652.00 | 5.46 | [M+H]+ | C25H24O12 | 517.15 | 4,5-DCQA Isochlorogenic acid C |
| ChenAn | 27840.00 | 3652.00 | 5.46 | [M+H]+ | C25H24O12 | 517.15 | Isochlorogenic acid A |
| ChenAn | 27600.00 | 7683.00 | 13.95 | [M+H]+ | C18H30O2 | 279.23 | GAMMA-LINOLENATE |
| ChenAn | 27210.00 | 2757.00 | 4.03 | [M+H]+ | C14H13F4N3O2S | 364.07 | Flufenacet |
| ChenAn | 26820.00 | 7777.00 | 6.33 | [M+H]+ | C35H46O20.NH3 | 804.29 | Echinacoside +NH3 |
| ChenAn | 26620.00 | 3909.00 | 3.38 | [M+H]+ | C6H8O2 | 113.06 | SORBATE |
| ChenAn | 26550.00 | 5715.00 | 7.51 | [M+H]+ | C21H20O12 | 465.10 | Isoquercitrin |
| ChenAn | 26550.00 | 5715.00 | 7.51 | [M+H]+ | C21H20O12 | 465.10 | Hyperin |
| ChenAn | 26450.00 | 6059.00 | 10.34 | [M+H]+ | C15H18O2 | 231.14 | Dehydrocostus lactone |
| ChenAn | 26450.00 | 6059.00 | 10.34 | [M+H]+ | C15H18O2 | 231.14 | Atractylenolide I |
| ChenAn | 26370.00 | 3136.00 | 5.40 | [M+H]+ | C10H14O | 151.11 | #NAME? |
| ChenAn | 26050.00 | 4432.00 | 6.65 | [M+H]+ | HOC6H2(OCH3)2CO2H | 199.06 | Syringic Acid |
| ChenAn | 25380.00 | 5804.00 | 9.06 | [M+H]+ | C41H68O14 | 785.47 | Astragaloside Ⅳ |
| ChenAn | 25120.00 | 1819.00 | 12.13 | [M+H]+ | C15H24O2 | 237.19 | Curdione |
| ChenAn | 24910.00 | 5918.00 | 4.98 | [M+H]+ | C8H8O2 | 137.06 | PHENYL ACETATE |
| ChenAn | 24860.00 | 4466.00 | 1.82 | [M+H]+ | C8H16N4O3 | 217.13 | Nα-Acetyl-L-arginine |
| ChenAn | 24750.00 | 6299.00 | 8.50 | [M+H]+ | C15H12O4 | 257.08 | Isoliquiritigenin |
| ChenAn | 24750.00 | 6299.00 | 8.50 | [M+H]+ | C15H12O4 | 257.08 | Liquiritigenin |
| ChenAn | 24670.00 | 4123.00 | 4.93 | [M+H]+ | C10H12N5O6P | 330.06 | CYCLIC AMP |
| ChenAn | 24310.00 | 7492.00 | 8.20 | [M+H]+ | C15H22O4 | 267.16 | Aspterric acid |
| ChenAn | 24310.00 | 7492.00 | 8.20 | [M+H]+ | C15H22O4 | 267.16 | Sambucinol |
| ChenAn | 24250.00 | 5833.00 | 4.98 | [M+H]+ | C5H4N4O | 137.05 | HYPOXANTHINE |
| ChenAn | 23880.00 | 4362.00 | 3.07 | [M+H]+ | C5H4N4O2 | 153.04 | XANTHINE |
| ChenAn | 23830.00 | 5491.00 | 9.34 | [M+H]+ | C15H10O6 | 287.06 | Kaempferol |
| ChenAn | 23830.00 | 5491.00 | 9.34 | [M+H]+ | C15H10O6 | 287.06 | Luteolin |
| ChenAn | 23700.00 | 3648.00 | 19.81 | [M+H]+ | C5H9NO | 100.08 | 1-Methyl-2-pyrrolidone |
| ChenAn | 23160.00 | 5383.00 | 11.92 | [M+H]+ | C9H10O3 | 167.07 | Ethyl 4-hydroxybenzoate |
| ChenAn | 23150.00 | 5610.00 | 8.22 | [M+H]+ | C31H40O15 | 653.24 | Epimeredinoside A |
| ChenAn | 22850.00 | 3322.00 | 5.40 | [M+H]+ | C10H14O | 151.11 | (+)-(S)-Carvone |
| ChenAn | 22740.00 | 7674.00 | 6.60 | [M+H]+ | C22H22O11 | 463.12 | Pratensein-7-O-glucoside |
| ChenAn | 22730.00 | 4793.00 | 10.51 | [M+H]+ | C14H22O4 | 255.16 | Palitantin |
| ChenAn | 22620.00 | 5117.00 | 9.34 | [M+H]+ | C15H10O6 | 287.06 | Kaempferol |
| ChenAn | 22620.00 | 5117.00 | 9.34 | [M+H]+ | C15H10O6 | 287.06 | Luteolin |
| ChenAn | 22470.00 | 4470.00 | 7.62 | [M+H]+ | C13H22O3 | 227.16 | Methyl dihydrojasmonate |
| ChenAn | 22430.00 | 6877.00 | 11.73 | [M+H]+ | C16H25NO3 | 280.20 | Moxisylyte |
| ChenAn | 22000.00 | 4443.00 | 9.25 | [M+H]+ | C14H22O4 | 255.16 | Palitantin |
| ChenAn | 21990.00 | 3711.00 | 4.93 | [M+H]+ | C10H12N5O6P | 330.06 | Adenosine 2,3-cyclic phosphate |
| ChenAn | 21990.00 | 3711.00 | 4.93 | [M+H]+ | C10H12N5O6P | 330.06 | cAMP |
| ChenAn | 21680.00 | 4381.00 | 6.52 | [M+H]+ | C21H20O12 | 465.10 | Isoquercitrin |
| ChenAn | 21680.00 | 4381.00 | 6.52 | [M+H]+ | C21H20O12 | 465.10 | Hyperin |
| ChenAn | 21510.00 | 5718.00 | 9.84 | [M+H]+ | C42H62O16 | 823.41 | Glycyrrhizic acid ammonium salt |
| ChenAn | 21360.00 | 6155.00 | 8.15 | [M+H]+ | C12H14O2 | 191.11 | Ligustilide |
| ChenAn | 21190.00 | 4177.00 | 7.17 | [M+H]+ | C14H6O8 | 303.01 | Ellagic acid |
| ChenAn | 21100.00 | 2975.00 | 9.80 | [M+H]+ | C4H8O2 | 89.06 | ACETOIN |
| ChenAn | 21100.00 | 2975.00 | 9.80 | [M+H]+ | C4H8O2 | 89.06 | BUTANOATE |
| ChenAn | 21100.00 | 2975.00 | 9.80 | [M+H]+ | C4H8O2 | 89.06 | ISOBUTYRATE |
| ChenAn | 20950.00 | 4117.00 | 10.44 | [M+H]+ | C13H24O4 | 245.17 | 1,11-Undecanedicarboxylic acid |
| ChenAn | 20760.00 | 3871.00 | 1.76 | [M+H]+ | C4H5N3O | 112.05 | CYTOSINE |
| ChenAn | 20130.00 | 5436.00 | 18.08 | [M+H]+ | CH3(CH2)16CONH2 | 284.29 | Octadecanamide |
| ChenAn | 20010.00 | 5277.00 | 12.98 | [M+H]+ | C18H32O2 | 281.24 | LINOLEATE |
| ChenAn | 19910.00 | 6181.00 | 5.08 | [M+H]+ | C6H9NOS | 144.05 | 4-Methyl-5-thiazoleethanol |
| ChenAn | 19420.00 | 5775.00 | 6.23 | [M+H]+ | C16H27NO5 | 314.20 | Heliotrin |
| ChenAn | 19320.00 | 2429.00 | 6.87 | [M+H]+ | C10H14O | 151.11 | #NAME? |
| ChenAn | 18920.00 | 1547.00 | 9.85 | [M+H]+ | C15H22N2O3 | 279.16 | Tolycaine |
| ChenAn | 18500.00 | 3862.00 | 7.95 | [M+H]+ | C9H14O | 139.11 | 2-n-Pentylfuran |
| ChenAn | 18500.00 | 3862.00 | 7.95 | [M+H]+ | C9H14O | 139.11 | ISOPHORONE |
| ChenAn | 18080.00 | 1103.00 | 3.59 | [M+H]+ | C8H8O3 | 153.06 | Phenoxyacetic acid |
| ChenAn | 18080.00 | 1103.00 | 3.59 | [M+H]+ | C8H8O3 | 153.06 | Phenoxyacetic acid |
| ChenAn | 17770.00 | 4399.00 | 8.75 | [M+H]+ | C12H16O2 | 193.12 | 3-N-butyl-4,5-dihydrophthalide |
| ChenAn | 17600.00 | 1652.00 | 10.63 | [M+H]+ | HOCH2CH2CH(OH)CH2OH | 107.07 | 1,2,4-Butanetriol |
| ChenAn | 17590.00 | 3272.00 | 8.15 | [M+H]+ | C10H16 | 137.13 | carene |
| ChenAn | 17590.00 | 3272.00 | 8.15 | [M+H]+ | C10H16 | 137.13 | gamma-Terpinene |
| ChenAn | 17220.00 | 2971.00 | 17.52 | [M+H]+ | C24H40O4 | 393.30 | Hyodeoxycholic Acid |
| ChenAn | 17220.00 | 2971.00 | 17.52 | [M+H]+ | C24H40O4 | 393.30 | Hyodeoxycholic Acid |
| ChenAn | 17100.00 | 5254.00 | 4.98 | [M+H]+ | C5H4N4O | 137.05 | 6-Hydroxypurine |
| ChenAn | 16870.00 | 1779.00 | 3.10 | [M+H]+ | C7H6O2 | 123.04 | 4-HYDROXYBENZALDEHYDE |
| ChenAn | 16650.00 | 4598.00 | 7.77 | [M+H]+ | C12H10N4O2 | 243.09 | LUMICHROME |
| ChenAn | 16500.00 | 2870.00 | 8.55 | [M+H]+ | C13H22O3 | 227.16 | Methyl dihydrojasmonate |
| ChenAn | 15940.00 | 4700.00 | 10.84 | [M+H]+ | C21H22O8 | 403.14 | Nobiletin |
| ChenAn | 15940.00 | 3853.00 | 7.99 | [M+H]+ | C31H40O15.NH3 | 670.27 | Cistanoside D +NH4 |
| ChenAn | 15620.00 | 3447.00 | 5.21 | [M+H]+ | C9H7NO | 146.06 | 4-Hydroxyquinoline |
| ChenAn | 15620.00 | 3447.00 | 5.21 | [M+H]+ | C9H7NO | 146.06 | 8-Hydroxyquinoline |
| ChenAn | 15570.00 | 1777.00 | 2.08 | [M+H]+ | H2NC6H4OH | 110.06 | 4-aminophenol |
| ChenAn | 15570.00 | 1777.00 | 2.08 | [M+H]+ | C6H7NO | 110.06 | Hydroxymethylpyridine |
| ChenAn | 15240.00 | 3758.00 | 11.72 | [M+H]+ | C16H26O2 | 251.20 | Sclareolide |
| ChenAn | 15000.00 | 4299.00 | 16.60 | [M+H]+ | CH3(CH2)16CONH2 | 284.29 | Octadecanamide |
| ChenAn | 15000.00 | 1759.00 | 2.08 | [M+H]+ | H2NC6H4OH | 110.06 | 4-aminophenol |
| ChenAn | 14940.00 | 1960.00 | 2.61 | [M+H]+ | C8H11NO3 | 170.08 | PYRIDOXINE |
| ChenAn | 14940.00 | 1960.00 | 2.61 | [M+H]+ | C8H11NO3 | 170.08 | Vitamin B6 |
| ChenAn | 14260.00 | 1717.00 | 6.91 | [M+H]+ | C11H12O4 | 209.08 | Pyrenocine A |
| ChenAn | 14090.00 | 2101.00 | 2.43 | [M+H]+ | C10H14N5O8P | 364.07 | Guanosine monophosphate |
| ChenAn | 13260.00 | 2539.00 | 17.53 | [M+H]+ | C24H40O4 | 393.30 | Hyodeoxycholic Acid |
| ChenAn | 12520.00 | 2044.00 | 9.80 | [M+H]+ | C15H24O3 | 253.18 | 15-Hydroxyculmorone |
| ChenAn | 12350.00 | 3028.00 | 5.20 | [M+H]+ | C8H7NO | 134.06 | Indoxyl |
| ChenAn | 12260.00 | 2031.00 | 6.24 | [M+H]+ | [HOC6H3(OCH3)CHCHCO]2CH2 | 369.14 | Curcumin |
| ChenAn | 12260.00 | 2031.00 | 6.24 | [M+H]+ | C21H20O6 | 369.14 | Curcumin |
| ChenAn | 12030.00 | 2066.00 | 6.36 | [M+H]+ | C11H14O5 | 227.09 | Genipin |
| ChenAn | 12010.00 | 1252.00 | 6.42 | [M+H]+ | C9H12O2 | 153.09 | 2,6,6-Trimethyl-2-cyclohexene-1,4-dione |
| ChenAn | 11450.00 | 3538.00 | 6.70 | [M+H]+ | C9H6O4 | 179.03 | Daphnetin |
| ChenAn | 11450.00 | 3538.00 | 6.70 | [M+H]+ | C9H6O4 | 179.03 | Esculetin |
| ChenAn | 11180.00 | 2307.00 | 6.38 | [M+H]+ | C8H10O4 | 171.06 | 3,4-DIHYDROXYPHENYLGLYCOL |
| ChenAn | 11040.00 | 903.50 | 4.52 | [M+H]+ | C8H11NO3 | 170.08 | 6-HYDROXYDOPAMINE |
| ChenAn | 11040.00 | 903.50 | 4.52 | [M+H]+ | C8H11NO3 | 170.08 | NORADRENALINE |
| ChenAn | 11030.00 | 3172.00 | 6.80 | [M+H]+ | C10H8O5 | 209.04 | Fraxetin |
| ChenAn | 10960.00 | 760.50 | 3.66 | [M+H]+ | C6H7N5 | 150.08 | 3-METHYLADENINE |
| ChenAn | 10960.00 | 760.50 | 3.66 | [M+H]+ | C6H7N5 | 150.08 | 6-Methyladenine |
| ChenAn | 10960.00 | 760.50 | 3.66 | [M+H]+ | C6H7N5 | 150.08 | 9-Methyladenine |
| ChenAn | 10910.00 | 1994.00 | 7.39 | [M+H]+ | C11H10O4 | 207.07 | 6,7-Dimethoxycoumarin |
| ChenAn | 10890.00 | 3310.00 | 13.89 | [M+H]+ | C26H30O8 | 471.20 | Limonin |
| ChenAn | 10470.00 | 1179.00 | 1.62 | [M+H]+ | C8H8O | 121.06 | PHENYLACETALDEHYDE |
| ChenAn | 10470.00 | 1179.00 | 1.62 | [M+H]+ | C8H8O | 121.06 | PHENYLACETALDEHYDE |
| ChenAn | 10230.00 | 1588.00 | 11.65 | [M+H]+ | C15H22O | 219.17 | alpha-Cyperone |
| ChenAn | 10230.00 | 1588.00 | 11.65 | [M+H]+ | C15H22O | 219.17 | Germacrone;  (3E,7E)-3,7-dimethyl-10-propan-2-ylidenecyclodeca-3,7-dien-1-one |
| ChenAn | 10230.00 | 1588.00 | 11.65 | [M+H]+ | C15H22O | 219.17 | Aristolone |
| ChenAn | 10090.00 | 2569.00 | 9.76 | [M+H]+ | C15H12O4 | 257.08 | Isoliquiritigenin |
| ChenAn | 10090.00 | 2569.00 | 9.76 | [M+H]+ | C15H12O4 | 257.08 | Liquiritigenin |
| ChenAn | 9632.00 | 2750.00 | 5.95 | [M+H]+ | C6H8O2 | 113.06 | SORBATE |
| ChenAn | 9519.00 | 2746.00 | 5.95 | [M+H]+ | CH3CHCHCHCHCOOH | 113.06 | Sorbic acid |
| ChenAn | 9354.00 | 2295.00 | 15.39 | [M+H]+ | C16H30O2 | 255.23 | PALMITOLEATE |
| ChenAn | 9298.00 | 2617.00 | 11.41 | [M+H]+ | C41H64O13.NH3 | 782.47 | Momordin Ic +NH3 |
| ChenAn | 8551.00 | 1663.00 | 13.92 | [M+H]+ | C30H46O4 | 471.35 | Glycyrrhetinic acid |
| ChenAn | 8534.00 | 1686.00 | 9.17 | [M+H]+ | CH3OCO(CH2)7COOCH3 | 217.14 | Dimethyl azelate |
| ChenAn | 8139.00 | 2155.00 | 14.25 | [M+H]+ | C20H30O2 | 303.23 | Kaurenoic acid |
| ChenAn | 7745.00 | 981.60 | 3.25 | [M+H]+ | C10H14N5O6P | 332.08 | Deoxyadenosine monophosphate |
| ChenAn | 7744.00 | 782.10 | 2.72 | [M+H]+ | C5H9NO4 | 148.06 | Glutamic acid |
| ChenAn | 7712.00 | 1035.00 | 19.40 | [M+H]+ | C10H16 | 137.13 | carene |
| ChenAn | 7712.00 | 1035.00 | 19.40 | [M+H]+ | C10H16 | 137.13 | gamma-Terpinene |
| ChenAn | 7507.00 | 2067.00 | 12.03 | [M+H]+ | C15H20O2 | 233.15 | Costunolide |
| ChenAn | 7234.00 | 1685.00 | 6.10 | [M+H]+ | C6H6O2 | 111.04 | HYDROQUINONE |
| ChenAn | 6680.00 | 963.80 | 3.50 | [M+H]+ | C6H6O4 | 143.03 | cis,cis-Muconic acid |
| ChenAn | 6680.00 | 963.80 | 3.50 | [M+H]+ | C6H6O4 | 143.03 | Kojic acid |
| ChenAn | 6363.00 | 1387.00 | 13.41 | [M+H]+ | CH3SCH2CH2CHO | 105.03 | 3-(Methylthio)propionaldehyde |
| ChenAn | 6340.00 | 599.80 | 19.40 | [M+H]+ | (CH3)2CCHCOCH3 | 99.08 | MESITYL OXIDE |
| ChenAn | 6216.00 | 880.80 | 19.06 | [M+H]+ | C35H59NO13 | 702.41 | Leucomycin |
| ChenAn | 6045.00 | 800.50 | 9.40 | [M+H]+ | C15H24 | 205.20 | Patchouli alcohol (loss H20) |
| ChenAn | 5492.00 | 483.50 | 3.06 | [M+H]+ | C10H7NO2 | 174.06 | 2-QUINOLINECARBOXYLATE |
| ChenAn | 5492.00 | 483.50 | 3.06 | [M+H]+ | C10H7NO2 | 174.06 | 4-QUINOLINECARBOXYLATE |
| ChenAn | 5474.00 | 388.10 | 17.06 | [M+H]+ | C6H8O | 97.06 | 2,5-Dimethylfuran |
| ChenAn | 5382.00 | 866.80 | 11.52 | [M+H]+ | C6H4(CH3)2 | 107.08 | 1,4-Xylene |
| ChenAn | 5382.00 | 866.80 | 11.52 | [M+H]+ | C6H4(CH3)2 | 107.08 | m-Xylene |
| ChenAn | 5382.00 | 866.80 | 11.52 | [M+H]+ | C6H4(CH3)2 | 107.08 | o-Xylene |
| ChenAn | 5372.00 | 1752.00 | 15.05 | [M+H]+ | CH3(CH2)10COOC2H5 | 229.22 | Ethyl dodecanoate |
| ChenAn | 5355.00 | 490.50 | 4.42 | [M+H]+ | C10H7NO2 | 174.05 | 4-QUINOLINECARBOXYLATE |
| ChenAn | 5067.00 | 781.80 | 6.35 | [M+H]+ | C9H8O2 | 149.06 | cinnamic acid |
| ChenAn | 5041.00 | 906.70 | 7.61 | [M+H]+ | C12H16O2 | 193.12 | 3-N-butyl-4,5-dihydrophthalide |
| ChenAn | 4575.00 | 441.20 | 19.39 | [M+H]+ | C6H10O | 99.08 | Cyclohexanone |
| ChenAn | 4518.00 | 370.80 | 3.01 | [M+H]+ | H2NC6H3(OH)CO2H | 154.05 | 4-Aminosalicylic acid |
| ChenAn | 4518.00 | 370.80 | 3.01 | [M+H]+ | H2NC6H3(OH)CO2H | 154.05 | 4-Aminosalicylic acid |
| ChenAn | 4518.00 | 370.80 | 3.01 | [M+H]+ | C7H7NO3 | 154.05 | 5-Aminosalicylic_acid |
| ChenAn | 4518.00 | 370.80 | 3.01 | [M+H]+ | C7H7NO3 | 154.05 | 5-Aminosalicylic_acid |
| ChenAn | 4355.00 | 427.70 | 2.21 | [M+H]+ | C9H13N3O4 | 228.09 | DEOXYCYTIDINE |
| ChenAn | 4347.00 | 388.00 | 3.03 | [M+H]+ | C7H7NO3 | 154.05 | 3-HYDROXYANTHRANILATE |
| ChenAn | 4347.00 | 388.00 | 3.03 | [M+H]+ | C7H7NO3 | 154.05 | 3-HYDROXYANTHRANILATE |
| ChenAn | 4154.00 | 767.70 | 6.91 | [M+H]+ | C11H14O5 | 227.09 | Genipin |
| ChenAn | 4096.00 | 445.60 | 4.53 | [M+H]+ | C6H11NO3 | 146.08 | 4-Acetamidobutyric Acid |
| ChenAn | 4053.00 | 1034.00 | 10.91 | [M+H]+ | C14H17Cl2NO2 | 302.08 | Fenhexamid |
| ChenAn | 3952.00 | 429.20 | 8.06 | [M+H]+ | C16H26N2O2 | 279.20 | Alypin |
| ChenAn | 3879.00 | 400.80 | 3.00 | [M+H]+ | C5H9NO3 | 132.07 | 5-AMINOLEVULINATE |
| ChenAn | 3879.00 | 400.80 | 3.00 | [M+H]+ | C5H9NO3 | 132.07 | CIS-4-HYDROXY-D-PROLINE |
| ChenAn | 3879.00 | 400.80 | 3.00 | [M+H]+ | C5H9NO3 | 132.07 | cis-4-Hydroxyproline |
| ChenAn | 3879.00 | 400.80 | 3.00 | [M+H]+ | C5H9NO3 | 132.07 | N-ACETYLALANINE |
| ChenAn | 3879.00 | 400.80 | 3.00 | [M+H]+ | C5H9NO3 | 132.07 | TRANS-4-HYDROXY-L-PROLINE |
| ChenAn | 3682.00 | 640.30 | 7.70 | [M+H]+ | C11H8O3 | 189.05 | 1-HYDROXY-2-NAPHTHOATE |
| ChenAn | 3453.00 | 305.00 | 9.14 | [M+H]+ | C19H30O3 | 307.23 | Epioxandrolone |
| ChenAn | 3193.00 | 372.50 | 5.02 | [M+H]+ | C10H15NO | 166.12 | Hordenine |
| ChenAn | 2417.00 | 259.20 | 3.03 | [M+H]+ | C5H9NO3 | 132.07 | TRANS-4-HYDROXY-L-PROLINE |
| ChenAn | 1975.00 | 298.40 | 11.17 | [M+H]+ | C15H24 | 205.20 | Patchouli alcohol (loss H20) |
| ChenAn | 1632.00 | 276.90 | 6.43 | [M+H]+ | C11H22O | 171.17 | 2-UNDECANONE |
| ChenAn | 1465.00 | 205.40 | 18.34 | [M+H]+ | C6H10O | 99.08 | Cyclohexanone |
| ChenAn | 1465.00 | 205.40 | 18.34 | [M+H]+ | C6H10O | 99.08 | Cyclohexanone |
| ChenAn | 729.00 | 129.20 | 10.00 | [M+H]+ | (CH3)2CCHCH2CH2C(CH3)CHCH2CH2C(CH3)CHCH2OH | 223.20 | Farnesol |
| ChenAn | 703.80 | 118.10 | 12.41 | [M+H]+ | C30H50O2 | 443.39 | Betulin |
| ChenAn | 703.80 | 118.10 | 12.41 | [M+H]+ | C30H50O2 | 443.39 | Betulin |
| ChenAn | 640.00 | 107.20 | 19.67 | [M+H]+ | C5H13O14P3 | 390.97 | PHOSPHORIBOSYL PYROPHOSPHATE |
| ChenAn | 493.00 | 101.20 | 13.50 | [M+H]+ | C4H12N2 | 89.11 | PUTRESCINE |

**Supplementary Table 2. Table of active ingredients in JDK for network pharmacological analysis (Negative).**

| **Sample Name** | **Area** | **Height** | **Retention Time** | **Adduct / Charge** | **Formula** | **Found At Mass** | **Library Hit** |
| --- | --- | --- | --- | --- | --- | --- | --- |
| ChenAn | 14150000.00 | 2879000.00 | 6.78 | [M-H]- | C23H28O11.HCOOH | 525.16 | Paeoniflorin +HCOOH |
| ChenAn | 13960000.00 | 2730000.00 | 6.01 | [M-H]- | C27H32O16 | 611.16 | Hydroxysafflor yellow A |
| ChenAn | 10430000.00 | 2292000.00 | 7.71 | [M-H]- | C18H16O8 | 359.08 | ROSMARINATE |
| ChenAn | 9818000.00 | 2178000.00 | 7.71 | [M-H]- | C18H16O8 | 359.08 | Rosmarinic acid |
| ChenAn | 8319000.00 | 678700.00 | 2.11 | [M-H]- | C6H8O7 | 191.02 | CITRATE |
| ChenAn | 8319000.00 | 678700.00 | 2.11 | [M-H]- | C6H8O7 | 191.02 | Citric acid |
| ChenAn | 8113000.00 | 661500.00 | 2.11 | [M-H]- | HOC(COOH)(CH2COOH)2 | 191.02 | CITRATE |
| ChenAn | 8113000.00 | 661500.00 | 2.11 | [M-H]- | C6H8O7 | 191.02 | Citric acid |
| ChenAn | 7212000.00 | 924600.00 | 7.52 | [M-H]- | C36H30O16 | 717.15 | Salvianolic acid B |
| ChenAn | 6361000.00 | 1338000.00 | 8.05 | [M-H]- | C36H30O16 | 717.15 | Salvianolic acid B |
| ChenAn | 6346000.00 | 1345000.00 | 6.14 | [M-H]- | C16H18O9 | 353.09 | Chlorogenic Acid |
| ChenAn | 6346000.00 | 1345000.00 | 6.14 | [M-H]- | C16H18O9 | 353.09 | Chlorogenic Acid |
| ChenAn | 6004000.00 | 1447000.00 | 8.27 | [M-H]- | C26H22O10 | 493.11 | Salvianolic acid A |
| ChenAn | 5957000.00 | 1071000.00 | 5.65 | [M-H]- | C16H18O9 | 353.09 | Chlorogenic Acid |
| ChenAn | 5957000.00 | 1071000.00 | 5.65 | [M-H]- | C16H18O9 | 353.09 | Chlorogenic Acid |
| ChenAn | 5902000.00 | 1254000.00 | 6.14 | [M-H]- | C16H18O9 | 353.09 | Neochlorogenic acid |
| ChenAn | 5902000.00 | 1254000.00 | 6.14 | [M-H]- | C16H18O9 | 353.09 | 4-O-Caffeoyl quinic acid |
| ChenAn | 5902000.00 | 1254000.00 | 6.14 | [M-H]- | C16H18O9 | 353.09 | Cryptochlorogenic acid |
| ChenAn | 5527000.00 | 994800.00 | 5.65 | [M-H]- | C16H18O9 | 353.09 | Neochlorogenic acid |
| ChenAn | 5527000.00 | 994800.00 | 5.65 | [M-H]- | C16H18O9 | 353.09 | 4-O-Caffeoyl quinic acid |
| ChenAn | 5527000.00 | 994800.00 | 5.65 | [M-H]- | C16H18O9 | 353.09 | Cryptochlorogenic acid |
| ChenAn | 5423000.00 | 1407000.00 | 1.29 | [M-H]- | C6H8O7 | 191.02 | CITRATE |
| ChenAn | 5423000.00 | 1407000.00 | 1.29 | [M-H]- | C6H8O7 | 191.02 | Citric acid |
| ChenAn | 5320000.00 | 1383000.00 | 1.29 | [M-H]- | HOC(COOH)(CH2COOH)2 | 191.02 | CITRATE |
| ChenAn | 5320000.00 | 1383000.00 | 1.29 | [M-H]- | C6H8O7 | 191.02 | Citric acid |
| ChenAn | 4854000.00 | 1431000.00 | 7.30 | [M-H]- | C25H24O12 | 515.12 | 1,4-Dicaffeoylquinic Acid (Cynarin) |
| ChenAn | 4854000.00 | 1431000.00 | 7.30 | [M-H]- | C25H24O12 | 515.12 | 1,5-DCQA 1,5-Dicaffeoylquinic acid |
| ChenAn | 4854000.00 | 1431000.00 | 7.30 | [M-H]- | C25H24O12 | 515.12 | 3,4-DCQA Isochlorogenic acid B |
| ChenAn | 4854000.00 | 1431000.00 | 7.30 | [M-H]- | C25H24O12 | 515.12 | 3,5-Dicaffeoyl quinic acid |
| ChenAn | 4854000.00 | 1431000.00 | 7.30 | [M-H]- | C25H24O12 | 515.12 | 3,5-DCQA Isochlorogenic acid A |
| ChenAn | 4854000.00 | 1431000.00 | 7.30 | [M-H]- | C25H24O12 | 515.12 | 4,5-DCQA Isochlorogenic acid C |
| ChenAn | 4854000.00 | 1431000.00 | 7.30 | [M-H]- | C25H24O12 | 515.12 | Isochlorogenic acid A |
| ChenAn | 4854000.00 | 1431000.00 | 7.30 | [M-H]- | C25H24O12 | 515.12 | Isochlorogenic acid A |
| ChenAn | 4854000.00 | 1431000.00 | 7.30 | [M-H]- | C25H24O12 | 515.12 | Isochlorogenic acid B |
| ChenAn | 4854000.00 | 1431000.00 | 7.30 | [M-H]- | C25H24O12 | 515.12 | Isochlorogenic acid B |
| ChenAn | 4854000.00 | 1431000.00 | 7.30 | [M-H]- | C25H24O12 | 515.12 | Isochlorogenic acid C |
| ChenAn | 4462000.00 | 707300.00 | 5.36 | [M-H]- | C9H10O5 | 197.05 | Danshensu |
| ChenAn | 3747000.00 | 930900.00 | 7.73 | [M-H]- | C26H22O10 | 493.11 | Salvianolic acid A |
| ChenAn | 3694000.00 | 1028000.00 | 1.09 | [M-H]- | C7H12O6 | 191.06 | QUINATE |
| ChenAn | 3694000.00 | 1028000.00 | 1.09 | [M-H]- | C7H12O6 | 191.06 | Quinic acid |
| ChenAn | 3593000.00 | 1005000.00 | 1.09 | [M-H]- | C7H12O6 | 191.06 | Quinic acid |
| ChenAn | 2629000.00 | 198400.00 | 3.74 | [M-H]- | C7H6O5 | 169.01 | Gallic acid |
| ChenAn | 2598000.00 | 689400.00 | 6.54 | [M-H]- | C25H24O12 | 515.12 | 1,4-Dicaffeoylquinic Acid (Cynarin) |
| ChenAn | 2598000.00 | 689400.00 | 6.54 | [M-H]- | C25H24O12 | 515.12 | 1,5-DCQA 1,5-Dicaffeoylquinic acid |
| ChenAn | 2598000.00 | 689400.00 | 6.54 | [M-H]- | C25H24O12 | 515.12 | 3,4-DCQA Isochlorogenic acid B |
| ChenAn | 2598000.00 | 689400.00 | 6.54 | [M-H]- | C25H24O12 | 515.12 | 3,5-Dicaffeoyl quinic acid |
| ChenAn | 2598000.00 | 689400.00 | 6.54 | [M-H]- | C25H24O12 | 515.12 | 3,5-DCQA Isochlorogenic acid A |
| ChenAn | 2598000.00 | 689400.00 | 6.54 | [M-H]- | C25H24O12 | 515.12 | 4,5-DCQA Isochlorogenic acid C |
| ChenAn | 2598000.00 | 689400.00 | 6.54 | [M-H]- | C25H24O12 | 515.12 | Isochlorogenic acid A |
| ChenAn | 2598000.00 | 689400.00 | 6.54 | [M-H]- | C25H24O12 | 515.12 | Isochlorogenic acid A |
| ChenAn | 2598000.00 | 689400.00 | 6.54 | [M-H]- | C25H24O12 | 515.12 | Isochlorogenic acid B |
| ChenAn | 2598000.00 | 689400.00 | 6.54 | [M-H]- | C25H24O12 | 515.12 | Isochlorogenic acid B |
| ChenAn | 2598000.00 | 689400.00 | 6.54 | [M-H]- | C25H24O12 | 515.12 | Isochlorogenic acid C |
| ChenAn | 2574000.00 | 193800.00 | 3.74 | [M-H]- | C7H6O5 | 169.01 | Gallic acid |
| ChenAn | 2249000.00 | 573300.00 | 1.17 | [M-H]- | C12H22O11 | 341.11 | Alpha-Lactose |
| ChenAn | 2249000.00 | 573300.00 | 1.17 | [M-H]- | C12H22O11 | 341.11 | Cellobiose |
| ChenAn | 2249000.00 | 573300.00 | 1.17 | [M-H]- | C12H22O11 | 341.11 | Isomaltose |
| ChenAn | 2249000.00 | 573300.00 | 1.17 | [M-H]- | C12H22O11 | 341.11 | LACTOSE |
| ChenAn | 2249000.00 | 573300.00 | 1.17 | [M-H]- | C12H22O11 | 341.11 | Lactulose |
| ChenAn | 2249000.00 | 573300.00 | 1.17 | [M-H]- | C12H22O11 | 341.11 | Melibiose |
| ChenAn | 2249000.00 | 573300.00 | 1.17 | [M-H]- | C12H22O11 | 341.11 | Sucrose |
| ChenAn | 2249000.00 | 573300.00 | 1.17 | [M-H]- | C12H22O11 | 341.11 | TREHALOSE |
| ChenAn | 2249000.00 | 573300.00 | 1.17 | [M-H]- | C12H22O11 | 341.11 | Turanose |
| ChenAn | 1710000.00 | 512600.00 | 8.43 | [M-H]- | C24H30O11.HCOOH | 539.18 | Harpagosid +HCOOH |
| ChenAn | 1485000.00 | 472500.00 | 16.15 | [M-H]- | C16H32O2 | 255.23 | PALMITATE |
| ChenAn | 1433000.00 | 436900.00 | 6.51 | [M-H]- | C9H8O4 | 179.04 | CAFFEATE |
| ChenAn | 1433000.00 | 436900.00 | 6.51 | [M-H]- | C9H8O4 | 179.04 | Caffeic acid |
| ChenAn | 1402000.00 | 426800.00 | 6.51 | [M-H]- | C9H8O4 | 179.04 | Caffeic acid |
| ChenAn | 1377000.00 | 442900.00 | 7.80 | [M-H]- | C9H16O4 | 187.10 | Azelaic acid |
| ChenAn | 1377000.00 | 442900.00 | 7.80 | [M-H]- | C9H16O4 | 187.10 | AZELATE |
| ChenAn | 1301000.00 | 414200.00 | 1.24 | [M-H]- | C4H6O5 | 133.01 | L-Malic acid |
| ChenAn | 1301000.00 | 414200.00 | 1.24 | [M-H]- | C4H6O5 | 133.01 | MALATE |
| ChenAn | 1301000.00 | 414200.00 | 1.24 | [M-H]- | C4H6O5 | 133.01 | Malic acid |
| ChenAn | 1287000.00 | 249400.00 | 5.29 | [M-H]- | C27H32O16 | 611.16 | Hydroxysafflor yellow A |
| ChenAn | 1286000.00 | 409900.00 | 1.24 | [M-H]- | C4H6O5 | 133.01 | L-Malic acid |
| ChenAn | 1233000.00 | 129100.00 | 2.33 | [M-H]- | C5H7NO3 | 128.04 | OXOPROLINE |
| ChenAn | 1233000.00 | 129100.00 | 2.33 | [M-H]- | C5H7NO3 | 128.04 | PYROGLUTAMATE |
| ChenAn | 1233000.00 | 129100.00 | 2.33 | [M-H]- | C5H7NO3 | 128.04 | Pyroglutamic acid |
| ChenAn | 1233000.00 | 129100.00 | 2.33 | [M-H]- | C5H7NO3 | 128.04 | Pyrrolidonecarboxylic acid |
| ChenAn | 1131000.00 | 73160.00 | 1.72 | [M-H]- | C5H8O5 | 147.03 | CITRAMALATE |
| ChenAn | 1129000.00 | 283100.00 | 17.31 | [M-H]- | C18H36O2 | 283.26 | STEARATE |
| ChenAn | 1129000.00 | 283100.00 | 17.31 | [M-H]- | C18H36O2 | 283.26 | Stearic acid |
| ChenAn | 1102000.00 | 258600.00 | 6.09 | [M-H]- | C7H12O5 | 175.06 | 2-Isopropylmalic acid |
| ChenAn | 1102000.00 | 258600.00 | 6.09 | [M-H]- | C7H12O5 | 175.06 | 2-Isopropylmalic acid |
| ChenAn | 1073000.00 | 269800.00 | 17.31 | [M-H]- | CH3(CH2)14COOC2H5 | 283.26 | Ethyl hexadecanoate1 |
| ChenAn | 1073000.00 | 252800.00 | 6.09 | [M-H]- | C7H12O5 | 175.06 | 2-Isopropylmalic acid |
| ChenAn | 1069000.00 | 224700.00 | 6.87 | [M-H]- | C7H6O4 | 153.02 | 2,3-DIHYDROXYBENZOATE |
| ChenAn | 1069000.00 | 224700.00 | 6.87 | [M-H]- | C7H6O4 | 153.02 | 2,4-Dihydroxybenzoic Acid |
| ChenAn | 1069000.00 | 224700.00 | 6.87 | [M-H]- | C7H6O4 | 153.02 | 2,6-Dihydroxybenzoic acid |
| ChenAn | 1069000.00 | 224700.00 | 6.87 | [M-H]- | C7H6O4 | 153.02 | 3,4-DIHYDROXYBENZOATE |
| ChenAn | 967000.00 | 287200.00 | 6.97 | [M-H]- | C27H30O16 | 609.15 | Rutin |
| ChenAn | 934200.00 | 228800.00 | 6.46 | [M-H]- | C8H8O4 | 167.04 | 3,4-Dihydroxybenzeneacetic acid |
| ChenAn | 934200.00 | 228800.00 | 6.46 | [M-H]- | C8H8O4 | 167.04 | 3,4-DIHYDROXYPHENYLACETATE |
| ChenAn | 934200.00 | 228800.00 | 6.46 | [M-H]- | C8H8O4 | 167.04 | HOMOGENTISATE |
| ChenAn | 911200.00 | 210300.00 | 7.15 | [M-H]- | C21H20O12 | 463.09 | Isoquercitrin |
| ChenAn | 911200.00 | 210300.00 | 7.15 | [M-H]- | C21H20O12 | 463.09 | Hyperin |
| ChenAn | 910700.00 | 223700.00 | 6.46 | [M-H]- | C8H8O4 | 167.04 | Vanillic acid |
| ChenAn | 845000.00 | 171500.00 | 5.11 | [M-H]- | C16H22O11 | 389.11 | 10-deacetylasperulosidic acid |
| ChenAn | 845000.00 | 171500.00 | 5.11 | [M-H]- | C16H22O11 | 389.11 | Monotropein |
| ChenAn | 839900.00 | 187300.00 | 6.78 | [M-H]- | C23H28O11 | 479.16 | Albiflorin |
| ChenAn | 839900.00 | 187300.00 | 6.78 | [M-H]- | C23H28O11 | 479.16 | Paeoniflorin |
| ChenAn | 827900.00 | 161300.00 | 0.96 | [M-H]- | C5H10O6 | 165.04 | D-Xylonic Acid Lithium Salt |
| ChenAn | 815400.00 | 252800.00 | 7.15 | [M-H]- | C9H8O3 | 163.04 | 4-COUMARATE |
| ChenAn | 797400.00 | 247300.00 | 7.15 | [M-H]- | C9H8O3 | 163.04 | p-Coumaric acid |
| ChenAn | 719700.00 | 204300.00 | 10.76 | [M-H]- | C43H70O15.HCOOH | 871.47 | Astragaloside Ⅱ +HCOOH |
| ChenAn | 714200.00 | 47400.00 | 1.73 | [M-H]- | C4H6O4 | 117.02 | METHYLMALONATE |
| ChenAn | 714200.00 | 47400.00 | 1.73 | [M-H]- | C4H6O4 | 117.02 | Methylmalonic acid |
| ChenAn | 714200.00 | 47400.00 | 1.73 | [M-H]- | C4H6O4 | 117.02 | SUCCINATE |
| ChenAn | 714200.00 | 47400.00 | 1.73 | [M-H]- | C4H6O4 | 117.02 | Succinic acid |
| ChenAn | 706500.00 | 47020.00 | 1.73 | [M-H]- | C4H6O4 | 117.02 | D-Erythronolactone |
| ChenAn | 706500.00 | 47020.00 | 1.73 | [M-H]- | C4H6O4 | 117.02 | Amber Acid |
| ChenAn | 706500.00 | 47020.00 | 1.73 | [M-H]- | C4H6O4 | 117.02 | Succinic acid |
| ChenAn | 700700.00 | 200000.00 | 6.12 | [M-H]- | (HO)2C6H3CHO | 137.02 | Protocatechuic Aldehyde |
| ChenAn | 695100.00 | 220100.00 | 9.96 | [M-H]- | C16H12O4 | 267.07 | Formononetin |
| ChenAn | 687300.00 | 195800.00 | 6.12 | [M-H]- | C7H6O3 | 137.02 | Protocatechuic aldehyde |
| ChenAn | 674500.00 | 182500.00 | 5.56 | [M-H]- | C7H6O4 | 153.02 | 2,3-DIHYDROXYBENZOATE |
| ChenAn | 674500.00 | 182500.00 | 5.56 | [M-H]- | C7H6O4 | 153.02 | 2,5-DIHYDROXYBENZOATE |
| ChenAn | 674500.00 | 182500.00 | 5.56 | [M-H]- | C7H6O4 | 153.02 | 2-Pyrocatechuic acid |
| ChenAn | 674500.00 | 182500.00 | 5.56 | [M-H]- | C7H6O4 | 153.02 | 3,4-DIHYDROXYBENZOATE |
| ChenAn | 674500.00 | 182500.00 | 5.56 | [M-H]- | C7H6O4 | 153.02 | Gentisic acid |
| ChenAn | 674500.00 | 182500.00 | 5.56 | [M-H]- | C7H6O4 | 153.02 | Protocatechuic acid |
| ChenAn | 669600.00 | 90540.00 | 11.56 | [M-H]- | C30H48O5 | 487.34 | Asiatic acid |
| ChenAn | 659700.00 | 178800.00 | 5.56 | [M-H]- | C7H6O4 | 153.02 | Protocatechuic acid |
| ChenAn | 641600.00 | 181400.00 | 11.46 | [M-H]- | C45H72O16.HCOOH | 913.48 | Astragaloside I +HCOOH |
| ChenAn | 641600.00 | 181400.00 | 11.46 | [M-H]- | C45H72O16.HCOOH | 913.48 | Astragaloside I +HCOOH |
| ChenAn | 635800.00 | 188000.00 | 8.67 | [M-H]- | C16H12O5 | 283.06 | Macrosporin |
| ChenAn | 635800.00 | 188000.00 | 8.67 | [M-H]- | C16H12O5 | 283.06 | Calycosin |
| ChenAn | 635800.00 | 188000.00 | 8.67 | [M-H]- | C16H12O5 | 283.06 | Genkwanin |
| ChenAn | 635800.00 | 188000.00 | 8.67 | [M-H]- | C16H12O5 | 283.06 | Acacetin |
| ChenAn | 635800.00 | 188000.00 | 8.67 | [M-H]- | C16H12O5 | 283.06 | Biochanin A |
| ChenAn | 634200.00 | 183000.00 | 9.67 | [M-H]- | C41H68O14.HCOOH | 829.46 | Astragaloside Ⅳ +HCOOH |
| ChenAn | 628900.00 | 29210.00 | 1.48 | [M-H]- | C10H12N5O7P | 344.04 | CYCLIC GMP |
| ChenAn | 610600.00 | 44430.00 | 2.63 | [M-H]- | C4H6O4 | 117.02 | METHYLMALONATE |
| ChenAn | 610600.00 | 44430.00 | 2.63 | [M-H]- | C4H6O4 | 117.02 | Methylmalonic acid |
| ChenAn | 610600.00 | 44430.00 | 2.63 | [M-H]- | C4H6O4 | 117.02 | SUCCINATE |
| ChenAn | 610600.00 | 44430.00 | 2.63 | [M-H]- | C4H6O4 | 117.02 | Succinic acid |
| ChenAn | 607400.00 | 151900.00 | 5.60 | [M-H]- | C17H24O11.HCOOH | 449.13 | Gardenoside +HCOOH |
| ChenAn | 604500.00 | 78910.00 | 1.39 | [M-H]- | C7H11NO5 | 188.06 | N-ACETYLGLUTAMATE |
| ChenAn | 604500.00 | 78910.00 | 1.39 | [M-H]- | C7H11NO5 | 188.06 | N-Acetylglutamic acid |
| ChenAn | 603100.00 | 44070.00 | 2.64 | [M-H]- | C4H6O4 | 117.02 | D-Erythronolactone |
| ChenAn | 603100.00 | 44070.00 | 2.64 | [M-H]- | C4H6O4 | 117.02 | Amber Acid |
| ChenAn | 603100.00 | 44070.00 | 2.64 | [M-H]- | C4H6O4 | 117.02 | Succinic acid |
| ChenAn | 600600.00 | 102500.00 | 1.24 | [M-H]- | C24H42O21 | 665.22 | STACHYOSE |
| ChenAn | 550700.00 | 174800.00 | 7.25 | [M-H]- | C29H36O15 | 623.20 | IsoActeoside |
| ChenAn | 550700.00 | 174800.00 | 7.25 | [M-H]- | C29H36O15 | 623.20 | IsoActeoside |
| ChenAn | 550700.00 | 174800.00 | 7.25 | [M-H]- | C29H36O15 | 623.20 | Acteoside; Verbascoside; Kusaginin |
| ChenAn | 550700.00 | 174800.00 | 7.25 | [M-H]- | C29H36O15 | 623.20 | Acteoside; Verbascoside; Kusaginin |
| ChenAn | 550700.00 | 174800.00 | 7.25 | [M-H]- | C29H36O15 | 623.20 | Verbascoside |
| ChenAn | 550700.00 | 174800.00 | 7.25 | [M-H]- | C29H36O15 | 623.20 | Verbascoside |
| ChenAn | 550700.00 | 174800.00 | 7.25 | [M-H]- | C29H36O15 | 623.20 | Forsythoside A |
| ChenAn | 550700.00 | 174800.00 | 7.25 | [M-H]- | C29H36O15 | 623.20 | Forsythoside A |
| ChenAn | 528400.00 | 160300.00 | 7.06 | [M-H]- | C22H22O10.HCOOH | 491.12 | Trifolirhizin +HCOOH |
| ChenAn | 528400.00 | 160300.00 | 7.06 | [M-H]- | C22H22O10.HCOOH | 491.12 | Calycosin-7-o-glucoside +HCOOH |
| ChenAn | 512300.00 | 44000.00 | 2.80 | [M-H]- | C5H8O5 | 147.03 | CITRAMALATE |
| ChenAn | 508000.00 | 114900.00 | 7.69 | [M-H]- | C23H28O11 | 479.16 | Albiflorin |
| ChenAn | 508000.00 | 114900.00 | 7.69 | [M-H]- | C23H28O11 | 479.16 | Paeoniflorin |
| ChenAn | 492000.00 | 147000.00 | 8.13 | [M-H]- | C7H6O3 | 137.02 | 3-Hydroxybenzoic acid |
| ChenAn | 492000.00 | 147000.00 | 8.13 | [M-H]- | C7H6O3 | 137.02 | 4-HYDROXYBENZOATE |
| ChenAn | 492000.00 | 147000.00 | 8.13 | [M-H]- | C7H6O3 | 137.02 | 4-Hydroxybenzoic acid |
| ChenAn | 492000.00 | 147000.00 | 8.13 | [M-H]- | C7H6O3 | 137.02 | SALICYLATE |
| ChenAn | 492000.00 | 147000.00 | 8.13 | [M-H]- | C7H6O3 | 137.02 | Salicylic acid |
| ChenAn | 483200.00 | 145400.00 | 8.13 | [M-H]- | C7H6O3 | 137.02 | Salicyclic Acid |
| ChenAn | 483200.00 | 145400.00 | 8.13 | [M-H]- | C7H6O3 | 137.02 | 4-Hydroxybenzoic acid |
| ChenAn | 483200.00 | 145400.00 | 8.13 | [M-H]- | C7H6O3 | 137.02 | Salicylic acid |
| ChenAn | 479000.00 | 95080.00 | 6.38 | [M-H]- | C8H6O4 | 165.02 | Phthalic acid |
| ChenAn | 479000.00 | 95080.00 | 6.38 | [M-H]- | C6H4(CO2H)2 | 165.02 | Terephthalic Acid |
| ChenAn | 475600.00 | 82090.00 | 6.13 | [M-H]- | C7H12O6 | 191.06 | QUINATE |
| ChenAn | 475600.00 | 82090.00 | 6.13 | [M-H]- | C7H12O6 | 191.06 | Quinic acid |
| ChenAn | 470200.00 | 92710.00 | 6.38 | [M-H]- | C6H4(CO2H)2 | 165.02 | Phthalic acid |
| ChenAn | 469500.00 | 143700.00 | 9.48 | [M-H]- | C12H20O4 | 227.13 | Traumatic acid |
| ChenAn | 436000.00 | 116100.00 | 1.31 | [M-H]- | C5H7NO3 | 128.04 | OXOPROLINE |
| ChenAn | 436000.00 | 116100.00 | 1.31 | [M-H]- | C5H7NO3 | 128.04 | PYROGLUTAMATE |
| ChenAn | 436000.00 | 116100.00 | 1.31 | [M-H]- | C5H7NO3 | 128.04 | Pyroglutamic acid |
| ChenAn | 436000.00 | 116100.00 | 1.31 | [M-H]- | C5H7NO3 | 128.04 | Pyrrolidonecarboxylic acid |
| ChenAn | 431000.00 | 130300.00 | 7.39 | [M-H]- | C10H10O4 | 193.05 | Isoferulic acid |
| ChenAn | 431000.00 | 130300.00 | 7.39 | [M-H]- | C10H10O4 | 193.05 | Ferulic Acid |
| ChenAn | 430200.00 | 133700.00 | 7.39 | [M-H]- | C10H10O4 | 193.05 | FERULATE |
| ChenAn | 430200.00 | 133700.00 | 7.39 | [M-H]- | C10H10O4 | 193.05 | Isoferulic acid |
| ChenAn | 430200.00 | 133700.00 | 7.39 | [M-H]- | C10H10O4 | 193.05 | trans-Ferulic acid |
| ChenAn | 418800.00 | 68520.00 | 5.36 | [M-H]- | C9H8O4 | 179.04 | CAFFEATE |
| ChenAn | 418800.00 | 68520.00 | 5.36 | [M-H]- | C9H8O4 | 179.04 | Caffeic acid |
| ChenAn | 406300.00 | 66530.00 | 5.36 | [M-H]- | C9H8O4 | 179.04 | Caffeic acid |
| ChenAn | 392300.00 | 120300.00 | 7.26 | [M-H]- | C27H30O15 | 593.15 | Aempferol-3-O-rutinoside |
| ChenAn | 380500.00 | 116900.00 | 14.90 | [M-H]- | C18H30O2 | 277.22 | Alpha-Linolenic acid |
| ChenAn | 378600.00 | 116800.00 | 15.56 | [M-H]- | C18H32O2 | 279.23 | Linoleic acid |
| ChenAn | 374400.00 | 101000.00 | 1.04 | [M-H]- | C18H32O16 | 503.16 | Maltotriose |
| ChenAn | 374400.00 | 101000.00 | 1.04 | [M-H]- | C18H32O16 | 503.16 | RAFFINOSE |
| ChenAn | 363600.00 | 95280.00 | 1.19 | [M-H]- | C5H10O5 | 149.05 | D-Xylose |
| ChenAn | 363600.00 | 95280.00 | 1.19 | [M-H]- | C5H10O5 | 149.05 | D-Xylulose |
| ChenAn | 359200.00 | 111100.00 | 15.56 | [M-H]- | C18H32O2 | 279.23 | Linoleic acid |
| ChenAn | 357400.00 | 108300.00 | 10.45 | [M-H]- | C13H24O4 | 243.16 | 1,11-Undecanedicarboxylic acid |
| ChenAn | 355900.00 | 108000.00 | 7.17 | [M-H]- | CH3OC6H4CHO | 135.05 | 4-Methoxybenzaldehyde |
| ChenAn | 349800.00 | 34020.00 | 2.73 | [M-H]- | C7H11NO5 | 188.06 | N-ACETYLGLUTAMATE |
| ChenAn | 349800.00 | 34020.00 | 2.73 | [M-H]- | C7H11NO5 | 188.06 | N-Acetylglutamic acid |
| ChenAn | 347500.00 | 73220.00 | 6.13 | [M-H]- | C7H12O6 | 191.06 | Quinic acid |
| ChenAn | 342300.00 | 92620.00 | 1.19 | [M-H]- | C5H10O5 | 149.05 | L(+)-Arabinose |
| ChenAn | 332600.00 | 24400.00 | 1.48 | [M-H]- | HO2CCH2C(CO2H)CHCO2H | 173.01 | cis-Aconitic acid |
| ChenAn | 332600.00 | 24400.00 | 1.48 | [M-H]- | HO2CCH2C(CO2H)CHCO2H | 173.01 | cis-Aconitic acid |
| ChenAn | 329600.00 | 38210.00 | 4.94 | [M-H]- | C6H8O7 | 191.02 | CITRATE |
| ChenAn | 329600.00 | 38210.00 | 4.94 | [M-H]- | C6H8O7 | 191.02 | Citric acid |
| ChenAn | 321400.00 | 88880.00 | 5.71 | [M-H]- | C11H12N2O2 | 203.08 | L-Tryptophan |
| ChenAn | 320700.00 | 67620.00 | 7.18 | [M-H]- | C14H6O8 | 301.00 | Ellagic Acid |
| ChenAn | 319100.00 | 73710.00 | 7.18 | [M-H]- | C14H6O8 | 301.00 | Ellagic acid |
| ChenAn | 317300.00 | 86680.00 | 5.71 | [M-H]- | C11H12N2O2 | 203.08 | L-Tryptophan |
| ChenAn | 308900.00 | 35730.00 | 4.94 | [M-H]- | HOC(COOH)(CH2COOH)2 | 191.02 | CITRATE |
| ChenAn | 308900.00 | 35730.00 | 4.94 | [M-H]- | C6H8O7 | 191.02 | Citric acid |
| ChenAn | 298300.00 | 21990.00 | 3.48 | [M-H]- | C10H13N5O5 | 282.08 | 2-Hydroxyadenosine |
| ChenAn | 298300.00 | 21990.00 | 3.48 | [M-H]- | C10H13N5O5 | 282.08 | Guanosine |
| ChenAn | 281500.00 | 78640.00 | 9.21 | [M-H]- | C17H14O7 | 329.07 | Aurantio-Obtusin |
| ChenAn | 278900.00 | 82370.00 | 8.05 | [M-H]- | C22H22O9.HCOOH | 475.13 | Ononin +HCOOH |
| ChenAn | 276500.00 | 21540.00 | 3.48 | [M-H]- | C10H13N5O5 | 282.08 | Guanosine |
| ChenAn | 274500.00 | 59630.00 | 7.10 | [M-H]- | C26H22O10 | 493.11 | Salvianolic acid A |
| ChenAn | 264700.00 | 60010.00 | 5.81 | [M-H]- | C9H10O4 | 181.05 | HYDROXYPHENYLLACTATE |
| ChenAn | 264700.00 | 60010.00 | 5.81 | [M-H]- | C9H10O4 | 181.05 | Hydroxyphenyllactic acid |
| ChenAn | 255600.00 | 62420.00 | 7.32 | [M-H]- | C28H32O16 | 623.16 | Isorhamnetin-3-O-neohespeidoside |
| ChenAn | 255600.00 | 62420.00 | 7.32 | [M-H]- | C28H32O16 | 623.16 | Narcissoside |
| ChenAn | 252700.00 | 98440.00 | 0.90 | [M-H]- | C6H14N4O2 | 173.10 | ARGININE |
| ChenAn | 252700.00 | 98440.00 | 0.90 | [M-H]- | C6H14N4O2 | 173.10 | D-Arginine |
| ChenAn | 252700.00 | 98440.00 | 0.90 | [M-H]- | C6H14N4O2 | 173.10 | L-Arginine |
| ChenAn | 251700.00 | 66400.00 | 12.31 | [M-H]- | C30H48O5 | 487.34 | Asiatic acid |
| ChenAn | 247400.00 | 96400.00 | 0.90 | [M-H]- | C6H14N4O2 | 173.10 | L(+)-Arginine |
| ChenAn | 233900.00 | 56250.00 | 10.78 | [M-H]- | C16H12O5 | 283.06 | Macrosporin |
| ChenAn | 233900.00 | 56250.00 | 10.78 | [M-H]- | C16H12O5 | 283.06 | Genkwanin |
| ChenAn | 233900.00 | 56250.00 | 10.78 | [M-H]- | C16H12O5 | 283.06 | Acacetin |
| ChenAn | 233900.00 | 56250.00 | 10.78 | [M-H]- | C16H12O5 | 283.06 | Glycetein |
| ChenAn | 232000.00 | 58860.00 | 1.28 | [M-H]- | C5H4O3 | 111.01 | 2-Furoic acid |
| ChenAn | 231000.00 | 47800.00 | 1.35 | [M-H]- | C9H12N2O6 | 243.06 | URIDINE |
| ChenAn | 220600.00 | 58660.00 | 4.90 | [M-H]- | C10H12N5O7P | 344.04 | CYCLIC GMP |
| ChenAn | 220400.00 | 45410.00 | 1.35 | [M-H]- | C9H12N2O6 | 243.06 | Uridine |
| ChenAn | 220400.00 | 45410.00 | 1.35 | [M-H]- | C9H12N2O6 | 243.06 | Uridine |
| ChenAn | 220200.00 | 12700.00 | 2.47 | [M-H]- | C6H10O5 | 161.05 | 3-HYDROXYMETHYLGLUTARATE |
| ChenAn | 219500.00 | 19620.00 | 2.12 | [M-H]- | C5H4O3 | 111.01 | 2-Furoic acid |
| ChenAn | 218500.00 | 19390.00 | 2.12 | [M-H]- | C5H4O3 | 111.01 | 2–Furanoic Acid |
| ChenAn | 218300.00 | 58210.00 | 1.28 | [M-H]- | C5H4O3 | 111.01 | 2–Furanoic Acid |
| ChenAn | 218200.00 | 29810.00 | 9.90 | [M-H]- | C30H48O6 | 503.34 | Madecassic acid |
| ChenAn | 212200.00 | 47500.00 | 5.18 | [M-H]- | C9H11NO2 | 164.07 | L-Phenylalanine |
| ChenAn | 212200.00 | 47500.00 | 5.18 | [M-H]- | C9H11NO2 | 164.07 | PHENYLALANINE |
| ChenAn | 204000.00 | 69720.00 | 5.00 | [M-H]- | C10H13N5O5 | 282.08 | Guanosine |
| ChenAn | 204000.00 | 69720.00 | 5.00 | [M-H]- | C10H13N5O5 | 282.08 | Guanosine |
| ChenAn | 194300.00 | 46130.00 | 5.18 | [M-H]- | C9H11NO2 | 164.07 | Phenprobamate |
| ChenAn | 194300.00 | 46130.00 | 5.18 | [M-H]- | C9H11NO2 | 164.07 | Phenylalanine |
| ChenAn | 194100.00 | 49340.00 | 5.09 | [M-H]- | C27H42O20.HCOOH | 731.23 | Rehmannioside D +HCOOH |
| ChenAn | 185800.00 | 17700.00 | 3.10 | [M-H]- | C9H11NO3 | 180.07 | TYROSINE |
| ChenAn | 182900.00 | 63970.00 | 5.00 | [M-H]- | C10H13N5O5 | 282.08 | 2-Hydroxyadenosine |
| ChenAn | 182900.00 | 63970.00 | 5.00 | [M-H]- | C10H13N5O5 | 282.08 | Guanosine |
| ChenAn | 181900.00 | 45560.00 | 10.58 | [M-H]- | C30H48O6 | 503.34 | Madecassic acid |
| ChenAn | 180000.00 | 53240.00 | 7.30 | [M-H]- | C13H14N2O3 | 245.09 | N-Acetyl-L-tryptophan |
| ChenAn | 175600.00 | 34800.00 | 15.47 | [M-H]- | C30H48O3 | 455.35 | Ursolic Acid |
| ChenAn | 175600.00 | 34800.00 | 15.47 | [M-H]- | C30H48O3 | 455.35 | Betulinic acid |
| ChenAn | 175600.00 | 34800.00 | 15.47 | [M-H]- | C30H48O3 | 455.35 | Oleanolic acid |
| ChenAn | 175400.00 | 43640.00 | 7.20 | [M-H]- | C21H18O12 | 461.07 | Luteolin-7-O-β-D-glucuronide |
| ChenAn | 175400.00 | 43640.00 | 7.20 | [M-H]- | C21H18O12 | 461.07 | Scutellarin |
| ChenAn | 175300.00 | 13220.00 | 1.68 | [M-H]- | C4H4O4 | 115.00 | Fumaric acid |
| ChenAn | 175300.00 | 13220.00 | 1.68 | [M-H]- | C4H4O4 | 115.00 | MALEATE |
| ChenAn | 173200.00 | 13070.00 | 1.68 | [M-H]- | C4H4O4 | 115.00 | Fumaric acid |
| ChenAn | 173200.00 | 13070.00 | 1.68 | [M-H]- | C4H4O4 | 115.00 | Maleic acid |
| ChenAn | 171100.00 | 36290.00 | 6.24 | [M-H]- | C7H6O4 | 153.02 | 2,3-DIHYDROXYBENZOATE |
| ChenAn | 171100.00 | 36290.00 | 6.24 | [M-H]- | C7H6O4 | 153.02 | 2,5-DIHYDROXYBENZOATE |
| ChenAn | 171100.00 | 36290.00 | 6.24 | [M-H]- | C7H6O4 | 153.02 | 2-Pyrocatechuic acid |
| ChenAn | 171100.00 | 36290.00 | 6.24 | [M-H]- | C7H6O4 | 153.02 | 3,4-DIHYDROXYBENZOATE |
| ChenAn | 171100.00 | 36290.00 | 6.24 | [M-H]- | C7H6O4 | 153.02 | Gentisic acid |
| ChenAn | 171100.00 | 36290.00 | 6.24 | [M-H]- | C7H6O4 | 153.02 | Protocatechuic acid |
| ChenAn | 170600.00 | 55550.00 | 9.18 | [M-H]- | C11H20O4 | 215.13 | Undecanedioic acid |
| ChenAn | 169900.00 | 51370.00 | 8.50 | [M-H]- | C10H18O4 | 201.11 | SEBACATE |
| ChenAn | 169900.00 | 51370.00 | 8.50 | [M-H]- | C10H18O4 | 201.11 | Sebacic acid |
| ChenAn | 169800.00 | 46450.00 | 6.17 | [M-H]- | C15H14O6 | 289.07 | Epicatechin |
| ChenAn | 168800.00 | 50830.00 | 9.82 | [M-H]- | C12H22O4 | 229.14 | Dodecanedioic acid |
| ChenAn | 168800.00 | 50830.00 | 9.82 | [M-H]- | C12H22O4 | 229.14 | Dodecanedioic acid |
| ChenAn | 168800.00 | 50830.00 | 9.82 | [M-H]- | C12H22O4 | 229.14 | Dodecanedioic acid |
| ChenAn | 166100.00 | 55890.00 | 11.10 | [M-H]- | C16H12O4 | 267.07 | Formononetin |
| ChenAn | 165200.00 | 13990.00 | 2.49 | [M-H]- | C16H22O11 | 389.11 | 10-deacetylasperulosidic acid |
| ChenAn | 165200.00 | 13990.00 | 2.49 | [M-H]- | C16H22O11 | 389.11 | Monotropein |
| ChenAn | 165000.00 | 40350.00 | 5.27 | [M-H]- | C15H24O10 | 363.13 | Harpagide |
| ChenAn | 164500.00 | 35440.00 | 6.24 | [M-H]- | C7H6O4 | 153.02 | Protocatechuic acid |
| ChenAn | 163500.00 | 43090.00 | 6.33 | [M-H]- | C35H46O20 | 785.25 | Echinacoside |
| ChenAn | 162600.00 | 48840.00 | 8.43 | [M-H]- | C23H28O10 | 463.16 | Isomucronulatol-7-O-glucoside |
| ChenAn | 162400.00 | 46460.00 | 11.89 | [M-H]- | C15H10O4 | 253.05 | Chrysophanol |
| ChenAn | 162400.00 | 46460.00 | 11.89 | [M-H]- | C15H10O4 | 253.05 | Chrysophanol |
| ChenAn | 160800.00 | 48480.00 | 9.82 | [M-H]- | C12H22O4 | 229.14 | Dodecanedioic acid |
| ChenAn | 157600.00 | 38770.00 | 6.69 | [M-H]- | HOC6H2(OCH3)2CO2H | 197.05 | Syringic Acid |
| ChenAn | 153400.00 | 33890.00 | 0.95 | [M-H]- | C6H14O6 | 181.07 | GALACTITOL |
| ChenAn | 153400.00 | 33890.00 | 0.95 | [M-H]- | C6H14O6 | 181.07 | Mannitol |
| ChenAn | 153400.00 | 33890.00 | 0.95 | [M-H]- | C6H14O6 | 181.07 | Sorbitol |
| ChenAn | 150200.00 | 42760.00 | 6.17 | [M-H]- | C15H14O6 | 289.07 | Epicatechin |
| ChenAn | 150200.00 | 42760.00 | 6.17 | [M-H]- | C15H14O6 | 289.07 | Catechin |
| ChenAn | 150200.00 | 42760.00 | 6.17 | [M-H]- | C15H14O6 | 289.07 | Epicatechin |
| ChenAn | 144900.00 | 42610.00 | 8.91 | [M-H]- | C30H32O12 | 583.18 | Benzoylpaeoniflorin |
| ChenAn | 144700.00 | 33150.00 | 0.95 | [M-H]- | C6H14O6 | 181.07 | D-Sorbitol |
| ChenAn | 144700.00 | 33150.00 | 0.95 | [M-H]- | C6H14O6 | 181.07 | Mannitol |
| ChenAn | 141700.00 | 40640.00 | 16.31 | [M-H]- | C18H34O2 | 281.25 | Elaidic acid |
| ChenAn | 141700.00 | 40640.00 | 16.31 | [M-H]- | C18H34O2 | 281.25 | Elaidic acid |
| ChenAn | 141700.00 | 40640.00 | 16.31 | [M-H]- | C18H34O2 | 281.25 | OLEATE |
| ChenAn | 141700.00 | 40640.00 | 16.31 | [M-H]- | C18H34O2 | 281.25 | Oleic acid |
| ChenAn | 141700.00 | 40640.00 | 16.31 | [M-H]- | C18H34O2 | 281.25 | Vaccenic acid |
| ChenAn | 137600.00 | 34250.00 | 5.20 | [M-H]- | C21H20O12 | 463.09 | Hyperin |
| ChenAn | 136300.00 | 41780.00 | 8.13 | [M-H]- | C6H6O | 93.03 | PHENOL |
| ChenAn | 136300.00 | 18270.00 | 2.35 | [M-H]- | C5H4N4O3 | 167.02 | URATE |
| ChenAn | 134300.00 | 20200.00 | 13.26 | [M-H]- | C30H48O4 | 471.35 | Echinocystic acid |
| ChenAn | 134300.00 | 20200.00 | 13.26 | [M-H]- | C30H48O4 | 471.35 | Hederagenin |
| ChenAn | 134300.00 | 20200.00 | 13.26 | [M-H]- | C30H48O4 | 471.35 | Corosolic acid |
| ChenAn | 132600.00 | 38200.00 | 16.31 | [M-H]- | C18H34O2 | 281.25 | Elaidic acid |
| ChenAn | 128400.00 | 34940.00 | 6.84 | [M-H]- | C7H6O2 | 121.03 | 4-HYDROXYBENZALDEHYDE |
| ChenAn | 126600.00 | 36510.00 | 12.60 | [M-H]- | C48H76O19 | 955.49 | Ginsenoside-Ro |
| ChenAn | 125600.00 | 17680.00 | 2.82 | [M-H]- | C24H42O21 | 665.22 | STACHYOSE |
| ChenAn | 125500.00 | 14530.00 | 6.73 | [M-H]- | C26H28O14 | 563.14 | Schaftoside |
| ChenAn | 125500.00 | 14530.00 | 6.73 | [M-H]- | C26H28O14 | 563.14 | Isoschaftoside |
| ChenAn | 123800.00 | 30920.00 | 5.76 | [M-H]- | C14H20O7.HCOOH | 345.12 | Salidroside +HCOOH |
| ChenAn | 118400.00 | 31110.00 | 7.45 | [M-H]- | C16H18O9 | 353.09 | Chlorogenic acid |
| ChenAn | 118400.00 | 31110.00 | 7.45 | [M-H]- | C16H18O9 | 353.09 | Chlorogenic acid |
| ChenAn | 116100.00 | 27580.00 | 7.75 | [M-H]- | C21H18O12 | 461.07 | Luteolin-7-O-β-D-glucuronide |
| ChenAn | 116100.00 | 27580.00 | 7.75 | [M-H]- | C21H18O12 | 461.07 | Scutellarin |
| ChenAn | 114800.00 | 19300.00 | 9.19 | [M-H]- | C36H58O10.HCOOH | 695.40 | Pedunculoside +HCOOH |
| ChenAn | 113200.00 | 35260.00 | 7.09 | [M-H]- | C8H14O4 | 173.08 | SUBERATE |
| ChenAn | 113200.00 | 35260.00 | 7.09 | [M-H]- | C8H14O4 | 173.08 | Suberic acid |
| ChenAn | 112200.00 | 30410.00 | 9.66 | [M-H]- | C30H32O12 | 583.18 | Benzoylpaeoniflorin |
| ChenAn | 111800.00 | 34540.00 | 7.03 | [M-H]- | C11H13NO3 | 206.08 | N-Acetyl-L-phenylalanine |
| ChenAn | 111800.00 | 34540.00 | 7.03 | [M-H]- | C11H13NO3 | 206.08 | N-ACETYLPHENYLALANINE |
| ChenAn | 109400.00 | 18930.00 | 7.93 | [M-H]- | C9H10O5 | 197.05 | Danshensu |
| ChenAn | 108400.00 | 9339.00 | 3.48 | [M-H]- | C6H6O3 | 125.02 | Maltol |
| ChenAn | 103800.00 | 10460.00 | 4.08 | [M-H]- | C10H12N5O6P | 328.05 | CYCLIC AMP |
| ChenAn | 102700.00 | 27940.00 | 6.46 | [M-H]- | CH3C6H3(OH)2 | 123.05 | Orcinol |
| ChenAn | 102600.00 | 17110.00 | 5.11 | [M-H]- | C15H22O9.HCOOH | 391.12 | Aucubin +HCOOH |
| ChenAn | 101500.00 | 27610.00 | 7.45 | [M-H]- | C16H18O9 | 353.09 | Neochlorogenic acid |
| ChenAn | 101500.00 | 27610.00 | 7.45 | [M-H]- | C16H18O9 | 353.09 | Chlorogenic acid |
| ChenAn | 101500.00 | 27610.00 | 7.45 | [M-H]- | C16H18O9 | 353.09 | 4-O-Caffeoyl quinic acid |
| ChenAn | 101500.00 | 27610.00 | 7.45 | [M-H]- | C16H18O9 | 353.09 | Cryptochlorogenic acid |
| ChenAn | 101400.00 | 10800.00 | 2.65 | [M-H]- | C6H6O6 | 173.01 | trans-Aconitic acid |
| ChenAn | 99590.00 | 10560.00 | 2.65 | [M-H]- | HO2CCH2C(CO2H)CHCO2H | 173.01 | cis-Aconitic acid |
| ChenAn | 97340.00 | 13700.00 | 2.82 | [M-H]- | C24H42O21 | 665.22 | Fungitetraose |
| ChenAn | 96910.00 | 7558.00 | 1.49 | [M-H]- | C5H6O4 | 129.02 | 2-METHYLMALEATE |
| ChenAn | 96910.00 | 7558.00 | 1.49 | [M-H]- | C5H6O4 | 129.02 | 5-Oxo-2-tetrahydrofurancarboxylic acid |
| ChenAn | 96910.00 | 7558.00 | 1.49 | [M-H]- | C5H6O4 | 129.02 | Citraconic acid |
| ChenAn | 96910.00 | 7558.00 | 1.49 | [M-H]- | C5H6O4 | 129.02 | ITACONATE |
| ChenAn | 96910.00 | 7558.00 | 1.49 | [M-H]- | C5H6O4 | 129.02 | Itaconic acid |
| ChenAn | 96910.00 | 7558.00 | 1.49 | [M-H]- | C5H6O4 | 129.02 | Mesaconic acid |
| ChenAn | 96100.00 | 9866.00 | 4.08 | [M-H]- | C10H12N5O6P | 328.05 | Adenosine 2,3-cyclic phosphate |
| ChenAn | 96100.00 | 9866.00 | 4.08 | [M-H]- | C10H12N5O6P | 328.05 | cAMP |
| ChenAn | 95480.00 | 7254.00 | 1.49 | [M-H]- | HO2CCHCHCO2CH3 | 129.02 | Fumaric acid monomethyl ester |
| ChenAn | 95480.00 | 7254.00 | 1.49 | [M-H]- | HO2CCHCHCO2CH3 | 129.02 | Fumaric acid monomethyl ester |
| ChenAn | 94420.00 | 23960.00 | 8.65 | [M-H]- | C15H10O7 | 301.04 | Quercetin |
| ChenAn | 94420.00 | 23960.00 | 8.65 | [M-H]- | C15H10O7 | 301.04 | Quercetin |
| ChenAn | 93380.00 | 35260.00 | 0.90 | [M-H]- | C4H8N2O3 | 131.05 | ASPARAGINE |
| ChenAn | 91110.00 | 24470.00 | 1.28 | [M-H]- | C3H4O4 | 103.00 | MALONATE |
| ChenAn | 90400.00 | 17170.00 | 6.49 | [M-H]- | C18H32O16 | 503.17 | RAFFINOSE |
| ChenAn | 89690.00 | 18300.00 | 5.68 | [M-H]- | C27H22O18 | 633.07 | Corilagin |
| ChenAn | 87270.00 | 21980.00 | 8.65 | [M-H]- | C15H10O7 | 301.04 | Quercetin |
| ChenAn | 87270.00 | 21980.00 | 8.65 | [M-H]- | C15H10O7 | 301.04 | Quercetin |
| ChenAn | 87210.00 | 26270.00 | 6.47 | [M-H]- | HOC6H4CO2CH3 | 151.04 | Methylparaben |
| ChenAn | 87100.00 | 28040.00 | 1.06 | [M-H]- | C3H6O4 | 105.02 | GLYCERATE |
| ChenAn | 87100.00 | 28040.00 | 1.06 | [M-H]- | C3H6O4 | 105.02 | Glyceric acid |
| ChenAn | 85560.00 | 27200.00 | 10.14 | [M-H]- | C17H16O5 | 299.09 | 3-Hydroxy-9,10-Dimethoxypterocarpan |
| ChenAn | 85320.00 | 22140.00 | 9.46 | [M-H]- | C36H56O12 | 679.37 | Tenuifolin |
| ChenAn | 84270.00 | 4970.00 | 1.55 | [M-H]- | C3H6O3 | 89.02 | DL-Glyceraldehyde |
| ChenAn | 83330.00 | 23350.00 | 5.86 | [M-H]- | C30H26O12 | 577.13 | Procyanidin B2 |
| ChenAn | 82950.00 | 13620.00 | 6.37 | [M-H]- | C7H6O2 | 121.03 | 3-HYDROXYBENZALDEHYDE |
| ChenAn | 82950.00 | 13620.00 | 6.37 | [M-H]- | C7H6O2 | 121.03 | BENZOATE |
| ChenAn | 79310.00 | 24390.00 | 12.30 | [M-H]- | C33H58O14.HCOOH | 723.38 | Gingerglycolipid B +HCOOH |
| ChenAn | 78830.00 | 18210.00 | 13.09 | [M-H]- | C30H48O4 | 471.35 | Hederagenin |
| ChenAn | 78830.00 | 18210.00 | 13.09 | [M-H]- | C30H48O4 | 471.35 | Corosolic acid |
| ChenAn | 78660.00 | 21970.00 | 6.70 | [M-H]- | C8H15NO3 | 172.10 | N-ACETYLLEUCINE |
| ChenAn | 78250.00 | 8303.00 | 2.58 | [M-H]- | C9H13N2O9P | 323.03 | URIDINE MONOPHOSPHATE |
| ChenAn | 76720.00 | 17730.00 | 9.86 | [M-H]- | C42H66O14 | 793.44 | Chikusetsusponin IVa |
| ChenAn | 76720.00 | 17730.00 | 9.86 | [M-H]- | C42H66O14 | 793.44 | Tenacissoside H |
| ChenAn | 76440.00 | 22780.00 | 8.23 | [M-H]- | C31H40O15 | 651.23 | Epimeredinoside A |
| ChenAn | 76440.00 | 22780.00 | 8.23 | [M-H]- | C31H40O15 | 651.23 | Cistanoside D |
| ChenAn | 75720.00 | 21290.00 | 6.70 | [M-H]- | (CH3)2CHCH2CH(NHCOCH3)CO2H | 172.10 | N-Acetyl-L-leucine |
| ChenAn | 75310.00 | 14230.00 | 7.27 | [M-H]- | C9H8O4 | 179.03 | 3-(4-HYDROXYPHENYL)PYRUVATE |
| ChenAn | 74530.00 | 19370.00 | 1.17 | [M-H]- | C12H24O11 | 343.11 | Maltitol |
| ChenAn | 73390.00 | 20820.00 | 9.42 | [M-H]- | C16H14O6 | 301.07 | Hesperetin |
| ChenAn | 71850.00 | 8130.00 | 1.53 | [M-H]- | C24H42O21 | 665.22 | Fungitetraose |
| ChenAn | 71830.00 | 18970.00 | 8.62 | [M-H]- | C15H10O6 | 285.04 | Luteolin |
| ChenAn | 71830.00 | 18970.00 | 8.62 | [M-H]- | C15H10O6 | 285.04 | Luteolin |
| ChenAn | 71390.00 | 20190.00 | 8.29 | [M-H]- | C57H92O28 | 1223.57 | Platycodin D |
| ChenAn | 71340.00 | 7731.00 | 2.58 | [M-H]- | C9H13N2O9P | 323.03 | Uridine 5-monophosphate |
| ChenAn | 71160.00 | 4953.00 | 1.56 | [M-H]- | C3H6O3 | 89.02 | GLYCERALDEHYDE |
| ChenAn | 71160.00 | 4953.00 | 1.56 | [M-H]- | C3H6O3 | 89.02 | LACTATE |
| ChenAn | 69330.00 | 17960.00 | 8.94 | [M-H]- | C10H18N2O3 | 213.11 | DETHIOBIOTIN |
| ChenAn | 66130.00 | 18790.00 | 7.27 | [M-H]- | C30H26O13 | 593.15 | Tiliroside |
| ChenAn | 64220.00 | 16310.00 | 9.25 | [M-H]- | C15H10O5 | 269.05 | Apigenin |
| ChenAn | 63840.00 | 17440.00 | 9.43 | [M-H]- | C17H16O5 | 299.09 | 3-Hydroxy-9,10-Dimethoxypterocarpan |
| ChenAn | 63280.00 | 9601.00 | 9.12 | [M-H]- | C48H76O19 | 955.49 | Ginsenoside-Ro |
| ChenAn | 61930.00 | 17920.00 | 8.62 | [M-H]- | C15H10O6 | 285.04 | Luteolin |
| ChenAn | 61930.00 | 17920.00 | 8.62 | [M-H]- | C15H10O6 | 285.04 | Luteolin |
| ChenAn | 61930.00 | 17920.00 | 8.62 | [M-H]- | C15H10O6 | 285.04 | Luteolin |
| ChenAn | 61930.00 | 17920.00 | 8.62 | [M-H]- | C15H10O6 | 285.04 | Luteolin |
| ChenAn | 60900.00 | 14940.00 | 6.35 | [M-H]- | C7H12O4 | 159.07 | 3-Methyladipic acid |
| ChenAn | 60900.00 | 14940.00 | 6.35 | [M-H]- | C7H12O4 | 159.07 | 6-CARBOXYHEXANOATE |
| ChenAn | 60900.00 | 14940.00 | 6.35 | [M-H]- | C7H12O4 | 159.07 | Pimelic acid |
| ChenAn | 59380.00 | 8235.00 | 6.18 | [M-H]- | C9H8O3 | 163.04 | 4-COUMARATE |
| ChenAn | 59360.00 | 18350.00 | 12.25 | [M-H]- | C16H30O4 | 285.21 | Hexadecanedioic acid |
| ChenAn | 58650.00 | 14560.00 | 7.47 | [M-H]- | C21H20O11 | 447.09 | Luteoloside |
| ChenAn | 58650.00 | 14560.00 | 7.47 | [M-H]- | C21H20O11 | 447.09 | Luteolin-7-O-β-D-glucoside |
| ChenAn | 58650.00 | 14560.00 | 7.47 | [M-H]- | C21H20O11 | 447.09 | Cyanidin-3-O-glucoside |
| ChenAn | 58650.00 | 14560.00 | 7.47 | [M-H]- | C21H20O11 | 447.09 | Astragalin |
| ChenAn | 57470.00 | 13520.00 | 9.85 | [M-H]- | C42H62O16 | 821.40 | Glycyrrhizic acid ammonium salt |
| ChenAn | 57120.00 | 7902.00 | 6.17 | [M-H]- | C9H8O3 | 163.04 | p-Coumaric acid |
| ChenAn | 56080.00 | 11020.00 | 9.81 | [M-H]- | C20H28O4 | 331.19 | Carnosic acid |
| ChenAn | 55360.00 | 11890.00 | 9.18 | [M-H]- | C15H12O5 | 271.06 | Naringenin |
| ChenAn | 54550.00 | 5419.00 | 2.31 | [M-H]- | C6H5NO3 | 138.02 | 6-HYDROXYNICOTINATE |
| ChenAn | 54550.00 | 5419.00 | 2.31 | [M-H]- | C6H5NO3 | 138.02 | 6-Hydroxynicotinic acid |
| ChenAn | 54080.00 | 16530.00 | 0.91 | [M-H]- | C4H7NO4 | 132.03 | Aspartic acid |
| ChenAn | 53860.00 | 11880.00 | 6.74 | [M-H]- | C6H12O3 | 131.07 | 2-Ethyl-2-Hydroxybutyric acid |
| ChenAn | 53860.00 | 11880.00 | 6.74 | [M-H]- | C6H12O3 | 131.07 | 2-Hydroxycaproic acid |
| ChenAn | 53860.00 | 11880.00 | 6.74 | [M-H]- | C6H12O3 | 131.07 | Leucinic acid |
| ChenAn | 51660.00 | 7174.00 | 10.66 | [M-H]- | C26H45NO6S | 498.29 | Taurodeoxycholic acid |
| ChenAn | 51090.00 | 11470.00 | 6.74 | [M-H]- | (CH3)2CHCH2CH(OH)CO2H | 131.07 | (S)-(-)-2-Hydroxyisocaproic Acid |
| ChenAn | 50760.00 | 8217.00 | 7.33 | [M-H]- | C27H30O14 | 577.16 | Rhoifolin |
| ChenAn | 50760.00 | 5522.00 | 3.34 | [M-H]- | HO2CCH2C(CO2H)CHCO2H | 173.01 | cis-Aconitic acid |
| ChenAn | 50310.00 | 15570.00 | 7.90 | [M-H]- | C7H6O2 | 121.03 | 3-HYDROXYBENZALDEHYDE |
| ChenAn | 50310.00 | 15570.00 | 7.90 | [M-H]- | C7H6O2 | 121.03 | BENZOATE |
| ChenAn | 49600.00 | 8145.00 | 5.36 | [M-H]- | C9H17NO5 | 218.10 | PANTOTHENATE |
| ChenAn | 49600.00 | 8145.00 | 5.36 | [M-H]- | C9H17NO5 | 218.10 | Pantothenic acid |
| ChenAn | 47790.00 | 13620.00 | 6.23 | [M-H]- | C6H6O | 93.03 | PHENOL |
| ChenAn | 44740.00 | 2856.00 | 5.94 | [M-H]- | C6H8O7 | 191.02 | Citric acid |
| ChenAn | 44740.00 | 2856.00 | 5.94 | [M-H]- | C6H8O7 | 191.02 | Citric acid |
| ChenAn | 44670.00 | 4650.00 | 1.49 | [M-H]- | C6H13NO2 | 130.09 | ISOLEUCINE |
| ChenAn | 44670.00 | 4650.00 | 1.49 | [M-H]- | C6H13NO2 | 130.09 | ISOLEUCINE |
| ChenAn | 44470.00 | 11050.00 | 6.82 | [M-H]- | C7H12O4 | 159.07 | 3-Methyladipic acid |
| ChenAn | 44470.00 | 11050.00 | 6.82 | [M-H]- | C7H12O4 | 159.07 | 6-CARBOXYHEXANOATE |
| ChenAn | 44470.00 | 11050.00 | 6.82 | [M-H]- | C7H12O4 | 159.07 | Pimelic acid |
| ChenAn | 44420.00 | 10680.00 | 9.42 | [M-H]- | C36H58O10.HCOOH | 695.40 | Pedunculoside +HCOOH |
| ChenAn | 43250.00 | 5384.00 | 4.04 | [M-H]- | C10H14N5O8P | 362.05 | GUANOSINE MONOPHOSPHATE |
| ChenAn | 42930.00 | 11450.00 | 9.67 | [M-H]- | C42H72O13.HCOOH | 829.46 | Ginsenoside F2 +HCOOH |
| ChenAn | 42030.00 | 10920.00 | 9.14 | [M-H]- | C12H20O4 | 227.13 | Traumatic acid |
| ChenAn | 41910.00 | 11220.00 | 8.84 | [M-H]- | C10H12N4O5 | 267.07 | INOSINE |
| ChenAn | 41690.00 | 12690.00 | 7.43 | [M-H]- | C10H8O4 | 191.03 | Isoscopoletin |
| ChenAn | 41690.00 | 12690.00 | 7.43 | [M-H]- | C10H8O4 | 191.03 | Scopoletin |
| ChenAn | 41690.00 | 12690.00 | 7.43 | [M-H]- | C10H8O4 | 191.03 | Isoscopolamine |
| ChenAn | 41070.00 | 4846.00 | 3.43 | [M-H]- | C10H14N5O7P | 346.06 | Adenosine monophosphate |
| ChenAn | 40930.00 | 12260.00 | 7.23 | [M-H]- | C9H10O3 | 165.06 | L-3-Phenyllactic acid |
| ChenAn | 40660.00 | 10170.00 | 1.27 | [M-H]- | C3H6O3 | 89.02 | GLYCERALDEHYDE |
| ChenAn | 40660.00 | 10170.00 | 1.27 | [M-H]- | C3H6O3 | 89.02 | LACTATE |
| ChenAn | 40530.00 | 10150.00 | 1.27 | [M-H]- | C3H6O3 | 89.02 | DL-Glyceraldehyde |
| ChenAn | 39590.00 | 11370.00 | 11.42 | [M-H]- | C41H64O13 | 763.43 | Momordin Ic |
| ChenAn | 39310.00 | 12050.00 | 7.23 | [M-H]- | C6H5CH2CH(OH)CO2H | 165.06 | (R)-2-Hydroxy-3-phenylpropionic acid |
| ChenAn | 39200.00 | 11860.00 | 15.23 | [M-H]- | C30H48O3 | 455.35 | Ursolic Acid |
| ChenAn | 39200.00 | 11860.00 | 15.23 | [M-H]- | C30H48O3 | 455.35 | Betulinic acid |
| ChenAn | 39200.00 | 11860.00 | 15.23 | [M-H]- | C30H48O3 | 455.35 | Oleanolic acid |
| ChenAn | 38670.00 | 10740.00 | 9.00 | [M-H]- | C59H96O26 | 1219.58 | Anemoside B4 |
| ChenAn | 36830.00 | 7386.00 | 18.77 | [M-H]- | C20H40O2 | 311.30 | ARACHIDATE |
| ChenAn | 36830.00 | 7386.00 | 18.77 | [M-H]- | C20H40O2 | 311.30 | Arachidic acid |
| ChenAn | 36700.00 | 6890.00 | 9.35 | [M-H]- | C15H10O6 | 285.04 | Kaempferol |
| ChenAn | 36700.00 | 6890.00 | 9.35 | [M-H]- | C15H10O6 | 285.04 | Luteolin |
| ChenAn | 34940.00 | 3821.00 | 5.28 | [M-H]- | C27H30O16 | 609.15 | Rutin |
| ChenAn | 34680.00 | 9686.00 | 7.86 | [M-H]- | C9H7NO | 144.05 | 4-Hydroxyquinoline |
| ChenAn | 33920.00 | 7989.00 | 10.61 | [M-H]- | C15H10O5 | 269.05 | Emodin |
| ChenAn | 33920.00 | 7989.00 | 10.61 | [M-H]- | C15H10O5 | 269.05 | Emodin |
| ChenAn | 33920.00 | 7989.00 | 10.61 | [M-H]- | C15H10O5 | 269.05 | Aloe-Emodine |
| ChenAn | 33230.00 | 12840.00 | 0.89 | [M-H]- | C6H9N3O2 | 154.06 | HISTIDINE |
| ChenAn | 33230.00 | 12840.00 | 0.89 | [M-H]- | C6H9N3O2 | 154.06 | L-Histidine |
| ChenAn | 33070.00 | 9852.00 | 10.11 | [M-H]- | C16H30O4 | 285.21 | Hexadecanedioic acid |
| ChenAn | 32880.00 | 6491.00 | 9.35 | [M-H]- | C15H10O6 | 285.04 | 3-Hydroxymorindone |
| ChenAn | 32880.00 | 6491.00 | 9.35 | [M-H]- | C15H10O6 | 285.04 | Luteolin |
| ChenAn | 32880.00 | 6491.00 | 9.35 | [M-H]- | C15H10O6 | 285.04 | Scutellarein |
| ChenAn | 32710.00 | 3357.00 | 3.06 | [M-H]- | C5H4N4O2 | 151.03 | XANTHINE |
| ChenAn | 32690.00 | 8408.00 | 7.11 | [M-H]- | C22H18O10 | 441.08 | (-)-Catechin Gallate |
| ChenAn | 32690.00 | 8408.00 | 7.11 | [M-H]- | C22H18O10 | 441.08 | Epicatechin gallate |
| ChenAn | 32360.00 | 12600.00 | 0.89 | [M-H]- | C6H9N3O2 | 154.06 | Histidine |
| ChenAn | 31560.00 | 8974.00 | 6.27 | [M-H]- | C27H22O18 | 633.07 | Corilagin |
| ChenAn | 31360.00 | 3286.00 | 3.06 | [M-H]- | C5H4N4O2 | 151.03 | Oxypurinol |
| ChenAn | 29510.00 | 8768.00 | 9.41 | [M-H]- | C22H36O2 | 331.25 | CP 47,497 C8-homolog Negative Mode |
| ChenAn | 28150.00 | 8058.00 | 14.24 | [M-H]- | C30H48O4 | 471.35 | Hederagenin |
| ChenAn | 28150.00 | 8058.00 | 14.24 | [M-H]- | C30H48O4 | 471.35 | Corosolic acid |
| ChenAn | 28050.00 | 7675.00 | 8.51 | [M-H]- | C15H12O4 | 255.07 | Isoliquiritigenin |
| ChenAn | 28050.00 | 7675.00 | 8.51 | [M-H]- | C15H12O4 | 255.07 | Liquiritigenin |
| ChenAn | 27970.00 | 9441.00 | 7.06 | [M-H]- | C16H12O5 | 283.06 | Macrosporin |
| ChenAn | 27970.00 | 9441.00 | 7.06 | [M-H]- | C16H12O5 | 283.06 | Calycosin |
| ChenAn | 27970.00 | 9441.00 | 7.06 | [M-H]- | C16H12O5 | 283.06 | Genkwanin |
| ChenAn | 27970.00 | 9441.00 | 7.06 | [M-H]- | C16H12O5 | 283.06 | Acacetin |
| ChenAn | 27970.00 | 9441.00 | 7.06 | [M-H]- | C16H12O5 | 283.06 | Glycetein |
| ChenAn | 27120.00 | 8592.00 | 8.93 | [M-H]- | C9H8O2 | 147.05 | Cinnamic acid |
| ChenAn | 26110.00 | 6747.00 | 10.58 | [M-H]- | C36H58O9 | 633.40 | Ecliptasaponin A |
| ChenAn | 26040.00 | 4897.00 | 5.18 | [M-H]- | C3H6O3 | 89.02 | DL-Glyceraldehyde |
| ChenAn | 26010.00 | 4779.00 | 5.18 | [M-H]- | C3H6O3 | 89.02 | GLYCERALDEHYDE |
| ChenAn | 26010.00 | 4779.00 | 5.18 | [M-H]- | C3H6O3 | 89.02 | LACTATE |
| ChenAn | 25680.00 | 7101.00 | 10.41 | [M-H]- | C48H76O19 | 955.49 | Ginsenoside-Ro |
| ChenAn | 25270.00 | 4763.00 | 9.06 | [M-H]- | C41H68O14.HCOOH | 829.46 | Astragaloside Ⅳ +HCOOH |
| ChenAn | 24990.00 | 2701.00 | 15.38 | [M-H]- | C15H22O4 | 265.15 | Sambucinol |
| ChenAn | 24290.00 | 2697.00 | 6.36 | [M-H]- | C21H20O9.HCOOH | 461.11 | Daidzin +HCOOH |
| ChenAn | 24280.00 | 6593.00 | 5.00 | [M-H]- | C10H12N4O5 | 267.07 | Inosine |
| ChenAn | 24050.00 | 2401.00 | 4.32 | [M-H]- | HO2CCHCHCO2CH3 | 129.02 | Fumaric acid monomethyl ester |
| ChenAn | 23830.00 | 4363.00 | 5.27 | [M-H]- | HO2CCH2CH(CH3)CO2H | 131.03 | 2-Methylsuccinic Acid |
| ChenAn | 23800.00 | 7527.00 | 16.70 | [M-H]- | C17H34O2 | 269.25 | HEPTADECANOATE |
| ChenAn | 23800.00 | 7527.00 | 16.70 | [M-H]- | C17H34O2 | 269.25 | Heptadecanoic acid |
| ChenAn | 23780.00 | 7736.00 | 7.21 | [M-H]- | C8H16O3 | 159.10 | 8-Hydroxyoctanoic acid |
| ChenAn | 23660.00 | 7694.00 | 7.21 | [M-H]- | C8H16O3 | 159.10 | 2-Hydroxyoctanoic acid |
| ChenAn | 23660.00 | 7138.00 | 11.68 | [M-H]- | C33H58O14.HCOOH | 723.37 | Gingerglycolipid B +HCOOH |
| ChenAn | 23340.00 | 4429.00 | 5.27 | [M-H]- | C5H8O4 | 131.03 | Dimethylmalonic acid |
| ChenAn | 23340.00 | 4429.00 | 5.27 | [M-H]- | C5H8O4 | 131.03 | ETHYLMALONATE |
| ChenAn | 23340.00 | 4429.00 | 5.27 | [M-H]- | C5H8O4 | 131.03 | GLUTARATE |
| ChenAn | 23340.00 | 4429.00 | 5.27 | [M-H]- | C5H8O4 | 131.03 | Glutaric acid |
| ChenAn | 23340.00 | 4429.00 | 5.27 | [M-H]- | C5H8O4 | 131.03 | Methylsuccinic acid |
| ChenAn | 23270.00 | 2379.00 | 4.33 | [M-H]- | C5H6O4 | 129.02 | 2-METHYLMALEATE |
| ChenAn | 23270.00 | 2379.00 | 4.33 | [M-H]- | C5H6O4 | 129.02 | 5-Oxo-2-tetrahydrofurancarboxylic acid |
| ChenAn | 23270.00 | 2379.00 | 4.33 | [M-H]- | C5H6O4 | 129.02 | Citraconic acid |
| ChenAn | 23270.00 | 2379.00 | 4.33 | [M-H]- | C5H6O4 | 129.02 | ITACONATE |
| ChenAn | 23270.00 | 2379.00 | 4.33 | [M-H]- | C5H6O4 | 129.02 | Itaconic acid |
| ChenAn | 23270.00 | 2379.00 | 4.33 | [M-H]- | C5H6O4 | 129.02 | Mesaconic acid |
| ChenAn | 23200.00 | 5694.00 | 6.30 | [M-H]- | C9H10O4 | 181.05 | HOMOVANILLATE |
| ChenAn | 23200.00 | 5694.00 | 6.30 | [M-H]- | C9H10O4 | 181.05 | Homovanillic Acid |
| ChenAn | 22830.00 | 1892.00 | 2.37 | [M-H]- | C4H6O5 | 133.01 | L-Malic acid |
| ChenAn | 22830.00 | 1892.00 | 2.37 | [M-H]- | C4H6O5 | 133.01 | MALATE |
| ChenAn | 22830.00 | 1892.00 | 2.37 | [M-H]- | C4H6O5 | 133.01 | Malic acid |
| ChenAn | 22490.00 | 7135.00 | 16.70 | [M-H]- | CH3(CH2)12COOCH(CH3)2 | 269.25 | Isopropyl myristate |
| ChenAn | 22360.00 | 5428.00 | 8.82 | [M-H]- | C16H12O6 | 299.06 | Hydroxygenkwanin |
| ChenAn | 22090.00 | 1820.00 | 2.37 | [M-H]- | C4H6O5 | 133.01 | L-Malic acid |
| ChenAn | 21760.00 | 3287.00 | 10.13 | [M-H]- | C36H30O16 | 717.15 | Salvianolic acid B |
| ChenAn | 21620.00 | 7152.00 | 5.00 | [M-H]- | C10H14N5O8P | 362.05 | GUANOSINE MONOPHOSPHATE |
| ChenAn | 20600.00 | 4257.00 | 7.73 | [M-H]- | C9H6O4 | 177.02 | Daphnetin |
| ChenAn | 20600.00 | 4257.00 | 7.73 | [M-H]- | C9H6O4 | 177.02 | Esculetin |
| ChenAn | 20470.00 | 3918.00 | 7.56 | [M-H]- | C21H20O10 | 431.10 | Apigenin-7-glucoside |
| ChenAn | 20470.00 | 3918.00 | 7.56 | [M-H]- | C21H20O10 | 431.10 | Sophoricoside |
| ChenAn | 19760.00 | 5360.00 | 7.07 | [M-H]- | C15H10O6 | 285.04 | 3-Hydroxymorindone |
| ChenAn | 19550.00 | 4955.00 | 6.29 | [M-H]- | H2NC6H3(OH)CO2H | 152.04 | 4-Aminosalicylic acid |
| ChenAn | 19070.00 | 6839.00 | 10.24 | [M-H]- | C17H18O5 | 301.11 | Isomucronulatol |
| ChenAn | 19070.00 | 1955.00 | 8.55 | [M-H]- | C21H22O11 | 449.11 | Astilbin |
| ChenAn | 19050.00 | 2688.00 | 6.56 | [M-H]- | C30H16O8 | 503.08 | Hypericin |
| ChenAn | 15670.00 | 4524.00 | 10.79 | [M-H]- | C15H12O4 | 255.07 | Pinocembrin |
| ChenAn | 14650.00 | 3882.00 | 10.31 | [M-H]- | HOC6H4CO2(CH2)3CH3 | 193.09 | Butylparaben |
| ChenAn | 14530.00 | 1448.00 | 4.53 | [M-H]- | C10H15N2O8P | 321.05 | 5-Thymidylic acid |
| ChenAn | 14530.00 | 1448.00 | 4.53 | [M-H]- | C10H15N2O8P | 321.05 | THYMIDINE-MONOPHOSPHATE |
| ChenAn | 12770.00 | 2217.00 | 10.11 | [M-H]- | C42H68O13.HCOOH | 825.47 | Saikosaponin A +HCOOH |
| ChenAn | 12770.00 | 2217.00 | 10.11 | [M-H]- | C42H68O13.HCOOH | 825.47 | Saikosaponin D +HCOOH |
| ChenAn | 12600.00 | 2664.00 | 6.39 | [M-H]- | C21H26O10 | 437.17 | Hamaudol Glycoside |
| ChenAn | 12600.00 | 2664.00 | 6.39 | [M-H]- | C21H26O10 | 437.17 | Hamaudol Glycoside |
| ChenAn | 12550.00 | 2816.00 | 8.82 | [M-H]- | C26H40O8.HCOOH | 525.27 | Neoandrographolide +HCOOH |
| ChenAn | 12500.00 | 1402.00 | 17.45 | [M-H]- | [(CH3)3C]2C6H2(CH3)OH | 219.18 | 2,6-Di-tert-butyl-4-methylphenol |
| ChenAn | 11810.00 | 3065.00 | 10.36 | [M-H]- | C26H40O8 | 479.26 | Neoandrographolide |
| ChenAn | 11500.00 | 965.50 | 4.19 | [M-H]- | C11H13N3O | 202.11 | L-TRYPTOPHANAMIDE |
| ChenAn | 11400.00 | 692.40 | 3.22 | [M-H]- | C6H11NO3 | 144.07 | 4-Acetamidobutyric Acid |
| ChenAn | 11300.00 | 3540.00 | 15.62 | [M-H]- | C15H30O2 | 241.22 | Pentadecanoic acid |
| ChenAn | 10820.00 | 2648.00 | 1.30 | [M-H]- | C6H11NO2 | 128.07 | PIPECOLATE |
| ChenAn | 10820.00 | 2648.00 | 1.30 | [M-H]- | C6H11NO2 | 128.07 | Pipecolic acid |
| ChenAn | 10670.00 | 1062.00 | 8.86 | [M-H]- | C27H30O15 | 593.15 | Aempferol-3-O-rutinoside |
| ChenAn | 10180.00 | 940.90 | 1.52 | [M-H]- | C5H9NO3 | 130.05 | N-ACETYLALANINE |
| ChenAn | 10180.00 | 940.90 | 1.52 | [M-H]- | C5H9NO3 | 130.05 | N-Acetyl-L-alanine |
| ChenAn | 10160.00 | 2795.00 | 9.30 | [M-H]- | C48H82O18.HCOOH | 991.52 | Gypenoside XVII +HCOOH |
| ChenAn | 10160.00 | 2795.00 | 9.30 | [M-H]- | C48H82O18.HCOOH | 991.52 | Gypenoside XVII +HCOOH |
| ChenAn | 10160.00 | 2795.00 | 9.30 | [M-H]- | C48H82O18.HCOOH | 991.52 | Ginsenoside Rd +HCOOH |
| ChenAn | 10160.00 | 2795.00 | 9.30 | [M-H]- | C48H82O18.HCOOH | 991.52 | Ginsenoside Rd +HCOOH |
| ChenAn | 10160.00 | 2795.00 | 9.30 | [M-H]- | C48H82O18.HCOOH | 991.52 | Ginsenoside Re +HCOOH |
| ChenAn | 10160.00 | 2795.00 | 9.30 | [M-H]- | C48H82O18.HCOOH | 991.52 | Ginsenoside Re +HCOOH |
| ChenAn | 10130.00 | 1739.00 | 15.20 | [M-H]- | C18H30O2 | 277.22 | Alpha-Linolenic acid |
| ChenAn | 9969.00 | 2654.00 | 10.95 | [M-H]- | C42H68O13.HCOOH | 825.47 | Saikosaponin A +HCOOH |
| ChenAn | 9969.00 | 2654.00 | 10.95 | [M-H]- | C42H68O13.HCOOH | 825.47 | Saikosaponin A +HCOOH |
| ChenAn | 9969.00 | 2654.00 | 10.95 | [M-H]- | C42H68O13.HCOOH | 825.47 | Saikosaponin D +HCOOH |
| ChenAn | 9969.00 | 2654.00 | 10.95 | [M-H]- | C42H68O13.HCOOH | 825.47 | Saikosaponin D +HCOOH |
| ChenAn | 9595.00 | 2719.00 | 10.58 | [M-H]- | C44H70O17 | 869.46 | Liriope muscari baily saponins C |
| ChenAn | 9299.00 | 1785.00 | 13.13 | [M-H]- | C14H22N2O | 233.16 | Lidocaine |
| ChenAn | 9043.00 | 1220.00 | 5.21 | [M-H]- | C8H14O4 | 173.08 | SUBERATE |
| ChenAn | 9043.00 | 1220.00 | 5.21 | [M-H]- | C8H14O4 | 173.08 | Suberic acid |
| ChenAn | 8897.00 | 1099.00 | 16.26 | [M-H]- | C2HF3O2 | 112.99 | PFEA (perfluoro-n-ethanoic acid) (neg) |
| ChenAn | 8537.00 | 1353.00 | 7.78 | [M-H]- | C23H28O10 | 463.16 | Isomucronulatol-7-O-glucoside |
| ChenAn | 8511.00 | 672.90 | 3.06 | [M-H]- | C8H8O4 | 167.03 | Vanillic acid |
| ChenAn | 8397.00 | 2667.00 | 13.44 | [M-H]- | C18H34O4 | 313.24 | Octadecanedioic acid |
| ChenAn | 8235.00 | 685.10 | 2.99 | [M-H]- | C5H9NO3 | 130.05 | N-ACETYLALANINE |
| ChenAn | 8235.00 | 685.10 | 2.99 | [M-H]- | C5H9NO3 | 130.05 | N-Acetyl-L-alanine |
| ChenAn | 8196.00 | 834.50 | 4.04 | [M-H]- | C10H13N4O9P | 363.05 | XANTHOSINE-MONOPHOSPHATE |
| ChenAn | 7960.00 | 679.70 | 3.06 | [M-H]- | C8H8O4 | 167.04 | 3,4-Dihydroxybenzeneacetic acid |
| ChenAn | 7960.00 | 679.70 | 3.06 | [M-H]- | C8H8O4 | 167.04 | 3,4-DIHYDROXYPHENYLACETATE |
| ChenAn | 7960.00 | 679.70 | 3.06 | [M-H]- | C8H8O4 | 167.04 | HOMOGENTISATE |
| ChenAn | 7960.00 | 679.70 | 3.06 | [M-H]- | C8H8O4 | 167.04 | Homogentisic acid |
| ChenAn | 7960.00 | 679.70 | 3.06 | [M-H]- | C8H8O4 | 167.04 | Vanillic acid |
| ChenAn | 7840.00 | 955.30 | 3.44 | [M-H]- | C9H10O3 | 165.06 | 3-(3-Hydroxyphenyl)Propionate Acid |
| ChenAn | 7840.00 | 955.30 | 3.44 | [M-H]- | C9H10O3 | 165.06 | m-EthoxybenzoIC ACID1 |
| ChenAn | 7840.00 | 955.30 | 3.44 | [M-H]- | C6H5CH2CH(OH)COOH | 165.06 | Phenyllactate (Pla) |
| ChenAn | 7840.00 | 955.30 | 3.44 | [M-H]- | C9H10O3 | 165.06 | p-Methoxyphenylacetic acid |
| ChenAn | 7840.00 | 955.30 | 3.44 | [M-H]- | C9H10O3 | 165.06 | Tropic acid |
| ChenAn | 7790.00 | 2210.00 | 13.79 | [M-H]- | [(CH3)3C]2C6H3OH | 205.16 | 2,4-Di-tert-butylphenol |
| ChenAn | 7230.00 | 1258.00 | 6.19 | [M-H]- | C33H40N2O9 | 607.27 | Reserpine |
| ChenAn | 7111.00 | 1294.00 | 8.69 | [M-H]- | C20H24O4 | 327.16 | Crocetin |
| ChenAn | 6477.00 | 2369.00 | 12.99 | [M-H]- | C18H30O2 | 277.22 | Alpha-Linolenic acid |
| ChenAn | 6449.00 | 1729.00 | 10.69 | [M-H]- | C45H72O16.HCOOH | 913.48 | Astragaloside I +HCOOH |
| ChenAn | 6106.00 | 1336.00 | 16.40 | [M-H]- | [(CH3)3C]2C6H2(CH3)OH | 219.18 | 2,6-Di-tert-butyl-4-methylphenol |
| ChenAn | 6016.00 | 1163.00 | 11.38 | [M-H]- | C36H58O9 | 633.40 | Ecliptasaponin A |
| ChenAn | 5644.00 | 1693.00 | 14.94 | [M-H]- | C30H46O3 | 453.34 | Betulonicacid |
| ChenAn | 5442.00 | 1265.00 | 16.02 | [M-H]- | C30H46O3 | 453.34 | Betulonicacid |
| ChenAn | 5149.00 | 690.90 | 1.41 | [M-H]- | C8H14O4 | 173.08 | SUBERATE |
| ChenAn | 4772.00 | 526.70 | 1.73 | [M-H]- | C4H9NO3 | 118.05 | ALLOTHREONINE |
| ChenAn | 4772.00 | 526.70 | 1.73 | [M-H]- | C4H9NO3 | 118.05 | L-Threonine |
| ChenAn | 4772.00 | 526.70 | 1.73 | [M-H]- | C4H9NO3 | 118.05 | THREONINE |
| ChenAn | 4687.00 | 374.20 | 2.46 | [M-H]- | CH3CH2COCOCH3 | 99.04 | 2,3-Pentanedione |
| ChenAn | 4665.00 | 944.40 | 8.74 | [M-H]- | C48H82O18.HCOOH | 991.52 | Gypenoside XVII +HCOOH |
| ChenAn | 4665.00 | 944.40 | 8.74 | [M-H]- | C48H82O18.HCOOH | 991.52 | Ginsenoside Rd +HCOOH |
| ChenAn | 4665.00 | 944.40 | 8.74 | [M-H]- | C48H82O18.HCOOH | 991.52 | Ginsenoside Re +HCOOH |
| ChenAn | 4232.00 | 480.00 | 10.64 | [M-H]- | C5HF11 | 268.99 | PFHxA in-source fragment (perfluoro-n-hexanoic acid) (neg) |
| ChenAn | 4074.00 | 1202.00 | 14.26 | [M-H]- | C20H32O3 | 319.23 | 12(S)HETE |
| ChenAn | 4074.00 | 1202.00 | 14.26 | [M-H]- | C20H32O3 | 319.23 | 15(S)HETE |
| ChenAn | 4074.00 | 1202.00 | 14.26 | [M-H]- | C20H32O3 | 319.23 | 5(S)HETE |
| ChenAn | 3622.00 | 677.70 | 10.04 | [M-H]- | C15H10O6 | 285.04 | Luteolin |
| ChenAn | 3622.00 | 677.70 | 10.04 | [M-H]- | C15H10O6 | 285.04 | Scutellarein |
| ChenAn | 3594.00 | 495.40 | 1.91 | [M-H]- | C5H12N2O2 | 131.09 | D-ORNITHINE |
| ChenAn | 3594.00 | 495.40 | 1.91 | [M-H]- | C5H12N2O2 | 131.09 | L-ORNITHINE |
| ChenAn | 3594.00 | 495.40 | 1.91 | [M-H]- | C5H12N2O2 | 131.09 | Ornithine |
| ChenAn | 3559.00 | 557.70 | 7.13 | [M-H]- | C6H13O9P | 259.03 | MANNOSE 6-PHOSPHATE |
| ChenAn | 3382.00 | 494.80 | 4.14 | [M-H]- | C11H12N2O3 | 219.08 | 5-Hydroxy-L-tryptophan |
| ChenAn | 3070.00 | 332.60 | 16.24 | [M-H]- | C4H6O6 | 149.01 | TARTRATE |
| ChenAn | 2831.00 | 520.90 | 9.07 | [M-H]- | C42H72O13.HCOOH | 829.47 | 20(R)-Ginsenoside Rg3 +HCOOH |
| ChenAn | 2831.00 | 520.90 | 9.07 | [M-H]- | C42H72O13.HCOOH | 829.47 | 20(S)Ginsenoside Rg3 +HCOOH |
| ChenAn | 2831.00 | 520.90 | 9.07 | [M-H]- | C42H72O13.HCOOH | 829.47 | Ginsenoside F2 +HCOOH |
| ChenAn | 2831.00 | 520.90 | 9.07 | [M-H]- | C42H72O13.HCOOH | 829.47 | Ginsenoside Rg2 +HCOOH |
| ChenAn | 2563.00 | 363.70 | 10.67 | [M-H]- | C40H58N8O8 | 777.41 | Heterophyllin B |
| ChenAn | 2541.00 | 572.80 | 10.49 | [M-H]- | C47H80O17 | 915.50 | Notoginsenoside Fe |
| ChenAn | 2541.00 | 572.80 | 10.49 | [M-H]- | C47H80O17 | 915.50 | Notoginsenoside Ft1 |
| ChenAn | 2075.00 | 318.30 | 7.85 | [M-H]- | C8H10O | 121.07 | 1-PHENYLETHANOL |
| ChenAn | 2075.00 | 318.30 | 7.85 | [M-H]- | C8H10O | 121.07 | 1-PHENYLETHANOL |
| ChenAn | 1946.00 | 496.00 | 17.73 | [M-H]- | C20H40O2 | 311.30 | ARACHIDATE |
| ChenAn | 1946.00 | 496.00 | 17.73 | [M-H]- | C20H40O2 | 311.30 | Arachidic acid |
| ChenAn | 1920.00 | 373.00 | 1.09 | [M-H]- | C5H6O2 | 97.03 | FURFURYL ALCOHOL |
| ChenAn | 1795.00 | 403.30 | 4.01 | [M-H]- | C5H9NO2 | 114.06 | L-Proline |
| ChenAn | 1795.00 | 403.30 | 4.01 | [M-H]- | C5H9NO2 | 114.06 | L-Proline |
| ChenAn | 1431.00 | 513.10 | 1.31 | [M-H]- | C6H11NO2 | 128.07 | 1-Aminocyclopentanecarboxylic acid |
| ChenAn | 1431.00 | 513.10 | 1.31 | [M-H]- | C6H11NO2 | 128.07 | Pipecolinic acid |
| ChenAn | 1415.00 | 369.80 | 9.77 | [M-H]- | C42H72O13 | 783.46 | 20(R)-Ginsenoside Rg3 |
| ChenAn | 1415.00 | 369.80 | 9.77 | [M-H]- | C42H72O13 | 783.46 | Ginsenoside Rg2 |
| ChenAn | 1338.00 | 208.60 | 12.92 | [M-H]- | CH3(CH2)12COOCH(CH3)2 | 269.25 | Isopropyl myristate |
| ChenAn | 1169.00 | 164.50 | 1.63 | [M-H]- | C4H4O6 | 147.00 | DIHYDROXYFUMARATE |
| ChenAn | 1088.00 | 484.50 | 8.01 | [M-H]- | C42H68O13.HCOOH | 825.47 | Saikosaponin A +HCOOH |
| ChenAn | 998.40 | 158.60 | 1.34 | [M-H]- | CH3CHCHCHCHCOOH | 111.05 | Sorbic acid |
| ChenAn | 887.10 | 210.80 | 7.85 | [M-H]- | C6H5CH(OH)CH3 | 121.07 | 1-PHENYLETHANOL |
| ChenAn | 887.10 | 210.80 | 7.85 | [M-H]- | C6H5CH(OH)CH3 | 121.07 | 1-PHENYLETHANOL |
| ChenAn | 887.10 | 210.80 | 7.85 | [M-H]- | (CH3)2C6H3OH | 121.07 | 2,6-Xylenol |
| ChenAn | 887.10 | 210.80 | 7.85 | [M-H]- | (CH3)2C6H3OH | 121.07 | 2,6-Xylenol |
| ChenAn | 887.10 | 210.80 | 7.85 | [M-H]- | C2H5C6H4OH | 121.07 | 4-Ethylphenol |
| ChenAn | 887.10 | 210.80 | 7.85 | [M-H]- | C2H5C6H4OH | 121.07 | 4-Ethylphenol |
| ChenAn | 455.50 | 122.70 | 11.72 | [M-H]- | C36H62O8.HCOOH | 667.44 | 20(R)-Ginsenoside Rh2 +HCOOH |
| ChenAn | 455.50 | 122.70 | 11.72 | [M-H]- | C36H62O8.HCOOH | 667.44 | Ginsenoside CK +HCOOH |
| ChenAn | 395.50 | 158.90 | 6.36 | [M-H]- | C6H5CH(OH)CH3 | 121.06 | 1-PHENYLETHANOL |
